# Supplementary material
Source: publisher figshare collection journal article supplement (https://gsajournals.figshare.com/articles/dataset/_/7066604)
Supplement: Supplementary file 1 [file 1]

## Supplementary materials

### **Two novel candidate genes for insulin secretion identified by comparative genomics of multiple backcross mouse populations**

Tanja Schallschmidt<sup>1,2\*</sup>, Sandra Lebek<sup>1,2\*</sup>, Delsi Altenhofen<sup>1,2</sup>, Mareike Damen<sup>1,2</sup>, Yvonne Schulte<sup>1,2</sup>, Birgit Knebel<sup>1,2</sup>, Ralf Herwig<sup>4</sup>, Axel Rasche<sup>4</sup>, Torben Stermann<sup>1,2</sup>, Anne Kamitz<sup>2,3</sup>, Nicole Hallahan<sup>2,3</sup>, Markus Jähnert<sup>2,3</sup>, Heike Vogel<sup>2,3</sup>, Annette Schürmann<sup>2,3</sup>, Alexandra Chadt<sup>1,2†</sup> and Hadi Al-Hasani<sup>1,2§</sup>

<sup>1</sup>Institute for Clinical Biochemistry and Pathobiochemistry, German Diabetes Center (DDZ), Heinrich Heine University, Medical Faculty, Duesseldorf, D-40225, Germany

<sup>2</sup>German Center for Diabetes Research (DZD), München-Neuherberg, D-85764, Germany

<sup>3</sup>Department of Experimental Diabetology, German Institute of Human Nutrition Potsdam-Rehbruecke, Nuthetal, D-14558, Germany

<sup>4</sup>Department of Computational Molecular Biology, Max Planck Institute for Molecular Genetics, Berlin, D-14195, Germany

\*Equal contribution

§Corresponding author

†Co-corresponding author

**A**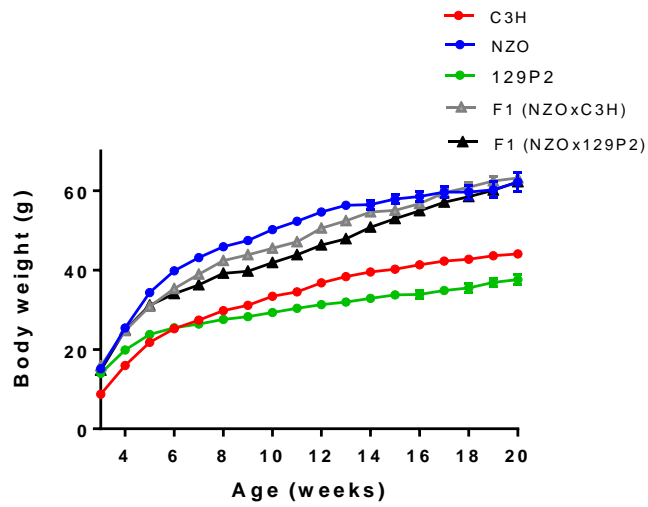**B**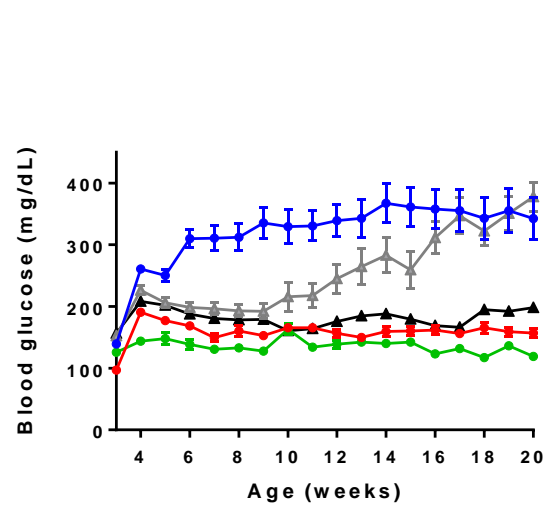

**Figure S1: Metabolic characterization of parental mouse strains 129P2, C3H and NZO and both F<sub>1</sub> (NZOxC3H and NZOx129P2) generations.** Body weight- (A) and blood glucose- (B) were measured weekly. Data represent mean values  $\pm$  SEM of male mice (129P2: n=17; C3H: n=18; NZO: n=24-35; F<sub>1</sub>(NZOxC3H): n=18; F<sub>1</sub>(NZOx129P2): n=17).

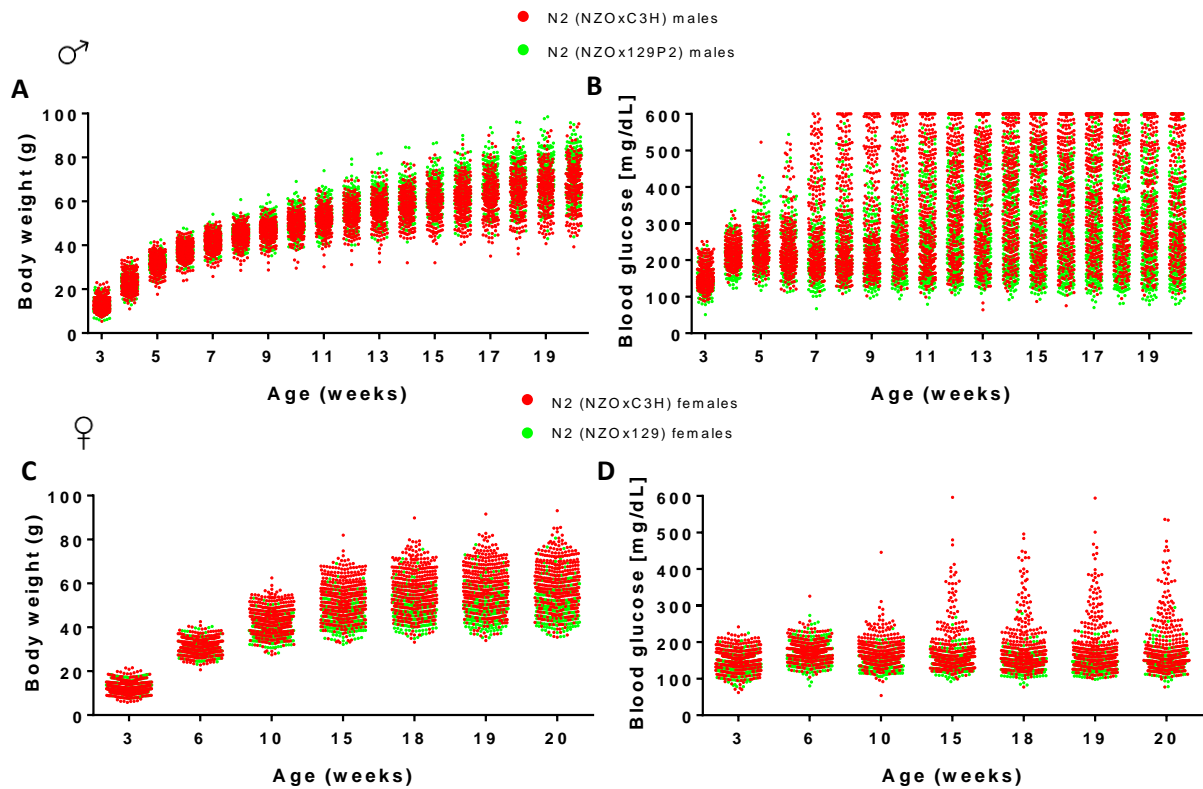

**Figure S2: Metabolic characterization of males and females of both backcross populations,  $N_2(NZOx F_1(NZOxC3H))$  and  $N_2(NZOx F_1(NZOx129P2))$ .** Body weight- (A: males, C: females) and blood glucose- (B: males, D: females) was measured weekly for the males and at weeks 3, 6, 10, 15, and 18-20 for the females. Dots represent single animals.  $N_2(NZOx F_1(NZOxC3H))$ : n=269-329 males and 300-310 females,  $N_2(NZOx F_1(NZOx129P2))$ : n=285-291 males and 300-307 females.

**Table S1: Summary of QTL (LOD >4) from males and females of both backcross populations, N<sub>2</sub>(NZOx F<sub>1</sub>(NZOxC3H)) and N<sub>2</sub>(NZOx F<sub>1</sub>(NZOx129P2)).** The significance threshold was determined using a permutation test; the 95%-confidence interval was calculated by Bayesian method using R/qtl software. **N<sub>2</sub>(NZOx F<sub>1</sub>(NZOxC3H)), Nx<sub>C</sub>:** n=269-329 males and 300-310 females, **N<sub>2</sub>(NZOx F<sub>1</sub>(NZOx129P2)), Nx<sub>129</sub>:** n=285-291 males and 300-307 females. BG, blood glucose; BW, body weight; C, C3H; Chr, chromosome; CI, confidence interval; f, female; FM, fat mass; FBG, fasting blood glucose; ins, insulin; LM, lean mass; LOD, logarithm of the odds; N, NZO; m, male; Pancr, Pancreas; Pos, Position.

| Name             | Sex | Chr | Trait        | Peak Pos. (cM) | 95% CI (cM) | Closest SNP-marker (Mbp) | Max. LOD | Week (max. effect) | Mean NZO/NZO | Mean C3H/NZO or NZO/129 | cross |
|------------------|-----|-----|--------------|----------------|-------------|--------------------------|----------|--------------------|--------------|-------------------------|-------|
| <i>Nbg7p</i>     | m   | 7   | BG           | 12             | 7-27        | 37.3                     | 13.3     | 10                 | 369 mg/dL    | 247 mg/dL               | NxC   |
|                  |     |     | BW           | 17             | 7-22        | 37.3                     | 7.4      | 17                 | 59.8 g       | 65.4 g                  | NxC   |
|                  |     |     | LM           | 11             | 4-21        | 37.3                     | 8.6      | 15                 | 31.5 g       | 33.2 g                  | NxC   |
|                  |     |     | Plasma ins   | 17             | 13-25       | 37.3                     | 4.8      | 21                 | 6.5 µg/L     | 11.3 µg/L               | NxC   |
| <i>Nbg7d</i>     | m   | 7   | BG           | 26             | 23-29       | 76.7                     | 12.5     | 10                 | 374 mg/dL    | 252 mg/dL               | NxC   |
| <i>Nbg4d</i>     | m   | 4   | BG           | 44             | 38-47       | 97.3                     | 7.4      | 17                 | 230 mg/dL    | 306 mg/dL               | Nx129 |
|                  |     |     | Liver weight | 46             | 40-63       | 108.8                    | 5.5      | 21                 | 567 mg       | 592 mg                  | Nx129 |
| <i>Nbg15p</i>    | m   | 15  | BG           | 23             | 18-30       | 63.3                     | 6.7      | 15                 | 410 mg/dL    | 310 mg/dL               | NxC   |
| <i>Nbg15d</i>    | m   | 15  | BG           | 41             | 34-47       | 98                       | 6.5      | 10                 | 349 mg/dL    | 272 mg/dL               | NxC   |
| <i>Nbg7fem</i>   | f   | 7   | BG           | 1              | 0-7         | 16.6                     | 6.8      | 20                 | 214 mg/dL    | 169 mg/dL               | NxC   |
| <i>Nbg4d</i>     | m   | 4   | BG           | 42             | 38-52       | 119                      | 6.6      | 20                 | 291 mg/dL    | 389 mg/dL               | NxC   |
|                  |     |     | Pancr ins    | 45             | 44-51       | 119                      | 4.2      | 21                 | 12.9 µg/mg   | 6.2 µg/mg               | NxC   |
|                  |     |     | Plasma ins   | 40             | 44-62       | 119                      | 4.3      | 21                 | 10.8 µg/L    | 7.2 µg/L                | NxC   |
| <i>Nbg5</i>      | m   | 5   | BG           | 34             | 14-43       | 63.4                     | 6.5      | 7                  | 293 mg/dL    | 225 mg/dL               | NxC   |
| <i>Nbg4p</i>     | m   | 4   | BG           | 28             | 23-31       | 58.1                     | 5.8      | 17                 | 234 mg/dL    | 307 mg/dL               | Nx129 |
| <i>Nbg6</i>      | m   | 6   | BG           | 51.7           | 33-52       | 139                      | 4.6      | 12                 | 394 mg/dL    | 312 mg/dL               | NxC   |
| <i>Nbg18</i>     | m   | 18  | BG           | 12.2           | 6-18        | 43.9                     | 4.3      | 3                  | 164 mg/dL    | 148 mg/dL               | NxC   |
| <i>Nbg8</i>      | m   | 8   | BG           | 11             | 2-18        | 41.1                     | 4.3      | 10                 | 346 mg/dL    | 279 mg/dL               | NxC   |
| <i>Nbg7_2</i>    | m   | 7   | BG           | 26.7           | 5-35        | 56.7                     | 4.2      | 18                 | 299 mg/dL    | 235 mg/dL               | Nx129 |
| <i>Nbg14</i>     | m   | 14  | FBG          | 0              | 0-7         | 11.0                     | 4.1      | 21                 | 215 mg/dL    | 164 mg/dL               | Nx129 |
| <i>Nbw4</i>      | m   | 4   | BW           | 32             | 16-41       | 91.0                     | 8.2      | 19                 | 69.1 g       | 62.7 g                  | NxC   |
| <i>Nbw10fem</i>  | f   | 10  | BW           | 7.2            | 5-11        | 89.1                     | 9.3      | 6                  | 32.1 g       | 29.5 g                  | NxC   |
| <i>Nbw4fem</i>   | f   | 4   | BW           | 15             | 8-27        | 53                       | 7.5      | 19                 | 62.1 g       | 56 g                    | NxC   |
| <i>Nbw14fem</i>  | f   | 14  | BW           | 23             | 17-30       | 63.6                     | 5.2      | 6                  | 31.8 g       | 29.8 g                  | NxC   |
| <i>Nbw13fem</i>  | f   | 13  | BW           | 29.0           | 0-29        | 74.4                     | 4.2      | 6                  | 31.8 g       | 30 g                    | NxC   |
| <i>Nbw16male</i> | m   | 16  | BW           | 1              | 0-25        | 11.5                     | 4.1      | 6                  | 38.1 g       | 36.3 g                  | NxC   |
| <i>Nlm10fem</i>  | f   | 10  | LM           | 6              | 3-11        | 89.1                     | 8.3      | 6                  | 20.3 g       | 19.2 g                  | NxC   |
| <i>Nlm3</i>      | m   | 3   | LM           | 51.7           | 32-52       | 86.2                     | 7.4      | 6                  | 27 g         | 25.6 g                  | NxC   |

| Name            | Sex | Chr | Trait | Peak Pos. (cM) | 95% CI (cM) | Closest SNP-marker (Mbp) | Max. LOD | Week (max. effect) | Mean NZO/NZO | Mean C3H/NZO or NZO/129 | cross |
|-----------------|-----|-----|-------|----------------|-------------|--------------------------|----------|--------------------|--------------|-------------------------|-------|
| <i>Nlm2</i>     | m   | 2   | LM    | 54             | 36-61       | 113.7                    | 5.9      | 15                 | 34.7 g       | 33.2 g                  | Nx129 |
| <i>Nlm10</i>    | m   | 10  | LM    | 8              | 0-14        | 89.1                     | 5.6      | 6                  | 26.9 g       | 25.6 g                  | NxC   |
| <i>Nlm2_2</i>   | m   | 2   | LM    | 29             | 22-44       | 84                       | 4.2      | 6                  | 26.7 g       | 25.6 g                  | NxC   |
| <i>Nfm4fem</i>  | f   | 4   | FM    | 15             | 8-25        | 53                       | 7.5      | 15                 | 28.7 g       | 24.7 g                  | NxC   |
| <i>Nfm14fem</i> | f   | 14  | FM    | 23             | 17-32       | 63.5                     | 6.3      | 6                  | 10.6 g       | 9.2 g                   | NxC   |
| <i>Nfm10fem</i> | f   | 10  | FM    | 7.2            | 3-10        | 89.1                     | 6.3      | 10                 | 20.6 g       | 17.8 g                  | NxC   |
| <i>Nfm14</i>    | m   | 14  | FM    | 26             | 6-32        | 77.5                     | 4.9      | 6                  | 10.1 g       | 8.9 g                   | NxC   |
| <i>Nfm6fem</i>  | f   | 6   | FM    | 20             | 5-50        | 64.2                     | 4.4      | 6                  | 10.5 g       | 9.3 g                   | NxC   |

**Table S2:** Coding non-synonymous single nucleotide polymorphisms (Cn-SNPs) in the critical QTL region of *Nbg7p*. The Sanger database (REL-1505 - GRCm38; <https://www.sanger.ac.uk>) was queried for SNPs where C3H/HeJ differed from both NZO/HILtJ and 129P2/OlaHsd. SNPs were analyzed for their potential impact on protein function using the 'Sorting Tolerant From Intolerant' (SIFT) algorithm<sup>1)</sup>. Reference allele in bold face. As SIFT score below 0.05 predicts a deleterious impact of the substitution.

| Position<br>Chr. 7 | Symbol         | dbSNP                    | 129P2/<br>OlaHsd | C3H/<br>HeJ | NZO/<br>HILtJ | Protein<br>position | Amino acid<br>exchange          | SIFT (score)     |
|--------------------|----------------|--------------------------|------------------|-------------|---------------|---------------------|---------------------------------|------------------|
| 30,056,835         | <i>Zfp82</i>   | rs51511420               | G                | <b>A</b>    | G             | 304                 | V [Val] ⇒ A [Ala]               | tolerated (0.16) |
| 30,751,848         | <i>Sbsn</i>    | rs52020542               | A                | <b>G</b>    | A             | 96                  | S [Ser] ⇒ N [Asn]               | tolerated (1)    |
| 30,867,466         | <i>Cd22</i>    | rs48887107               | C                | <b>T</b>    | C             | 796                 | T [Thr] ⇒ A [Ala]               | tolerated (0.35) |
| 31,359,121         | <i>Scgb2b3</i> | rs32370064               | G                | <b>A</b>    | G             | 86                  | F [Phe] ⇒ L [Leu]               | tolerated (0.84) |
| 31,360,167         | <i>Scgb2b3</i> | rs46476185               | C                | <b>T</b>    | C             | 61                  | K [Lys] ⇒ E [Glu]               | tolerated (1)    |
| 35,627,419         | <i>Ankrd27</i> | rs13471230               | C                | <b>T</b>    | C             | 730                 | S [Ser] ⇒ P [Pro]               | tolerated (1)    |
| 43,567,335         | <i>Zfp658</i>  | rs47840949               | C                | <b>T</b>    | C             | 43                  | V [Val] ⇒ A [Ala]               | tolerated (1)    |
| 43,572,611         | <i>Zfp658</i>  | rs51924694               | T                | <b>G</b>    | T             | 103                 | R [Arg] ⇒ S [Ser]               | tolerated (0.35) |
| 43,572,940         | <i>Zfp658</i>  | rs48214912               | A                | <b>G</b>    | A             | 213                 | S [Ser] ⇒ N [Asn]               | tolerated (1)    |
| 43,572,961         | <i>Zfp658</i>  | rs107750661              | A                | <b>G</b>    | A             | 220                 | G [Gly] ⇒ D [Asp]               | tolerated (0.53) |
| 43,572,987         | <i>Zfp658</i>  | rs46297319               | A                | <b>C</b>    | A             | 229                 | P [Pro] ⇒ T [Thr]               | tolerated (1)    |
| 43,573,008         | <i>Zfp658</i>  | rs47601314               | G                | <b>A</b>    | G             | 236                 | N [Asn] ⇒ D [Asp]               | tolerated (0.45) |
| 43,573,021         | <i>Zfp658</i>  | rs49887463               | G                | <b>T</b>    | G             | 240                 | L [Leu] ⇒ R [Arg]               | tolerated (0.51) |
| 43,573,029         | <i>Zfp658</i>  | rs46416895               | G                | <b>A</b>    | G             | 243                 | T [Thr] ⇒ A [Ala]               | tolerated (0.74) |
| 43,573,030         | <i>Zfp658</i>  | rs51202651               | G                | <b>C</b>    | G             | 243                 | T [Thr] ⇒ R [Arg]               | tolerated (0.64) |
| 43,573,708         | <i>Zfp658</i>  | rs49446471               | C                | <b>A</b>    | C             | 469                 | E [Glu] ⇒ A [Ala]               | tolerated (0.37) |
| 43,573,968         | <i>Zfp658</i>  | rs49517688               | G                | <b>A</b>    | G             | 556                 | I [Ile] ⇒ V [Val]               | tolerated (0.26) |
| 43,590,358         | <i>Zfp719</i>  | rs46898788               | G                | <b>C</b>    | G             | 457                 | H [His] ⇒ D [Asp]               | tolerated (0.49) |
| 43,659,249         | <i>Siglece</i> | rs47694652               | C                | <b>T</b>    | C             | 227                 | N [Asn] ⇒ D [Asp]               | tolerated (0.1)  |
| 43,660,062         | <i>Siglece</i> | rs46346803               | C                | <b>A</b>    | C             | 24                  | V [Val] ⇒ G [Gly]               | tolerated (0.77) |
| 44,016,001         | <i>Klk1b26</i> | rs39690593               | T                | <b>C</b>    | T             | 111                 | T [Thr] ⇒ I [Ile]               | tolerated (0.22) |
| 44,016,121         | <i>Klk1b26</i> | rs46793621               | A                | <b>C</b>    | A             | 151                 | T [Thr] ⇒ K [Lys]               | tolerated (0.31) |
| 44,016,267         | <i>Klk1b26</i> | rs46049640               | C                | <b>T</b>    | C             | 168                 | S [Ser] ⇒ P [Pro]               | tolerated (1)    |
| 44,016,819         | <i>Klk1b26</i> | rs37656890 <sup>2)</sup> | T                | <b>A</b>    | T             | 229                 | N [Asn] ⇒ Y [Tyr] <sup>3)</sup> | deleterious (0)  |
| 44,054,487         | <i>Klk1b27</i> | rs48236844               | T                | <b>C</b>    | T             | 18                  | A [Ala] ⇒ V [Val]               | tolerated (0.63) |
| 44,739,565         | <i>Zfp473</i>  | rs240887143              | A                | <b>C</b>    | A             | 44                  | W [Trp] ⇒ L [Leu]               | tolerated (1)    |

<sup>1)</sup> Kumar, P., S. Henikoff and P. C. Ng, 2009 Predicting the effects of coding non-synonymous variants on protein function using the SIFT algorithm. Nat Protoc 4: 1073-1081. <sup>2)</sup> Sanger panel strains with T allele (N ⇒ Y) for rs37656890: 129P2/OlaHsd, A/J, BALB/cJ, CAST/EiJ, DBA/1J, DBA/2J, I/LnJ, LEWES/EiJ, LP/J, MOLF/EiJ, NZB/B1NJ, NZO/HILtJ, NZW/LacJ, Sea/GnJ, St/bJ, WSB/EiJ; <sup>3)</sup> Residue not conserved among related kallikreins (e.g. W [Trp] in *Klk1b22*, *Klk1*, *Klk1b9*; I [Ile] in *Klk1b11*, *Klk1b21*, *Klk1b16*), not conserved across species (rat, human).

**Table S3:** Indel polymorphisms in the critical QTL region of *Nbg7p*. The Sanger database (REL-1505 - GRCm38; <https://www.sanger.ac.uk>) was queried for Indel polymorphisms where C3H/HeJ differed from both NZO/HILtJ and 129P2/OlaHsd. All indels fulfilling the criteria mapped in intronic or intergenic regions.

| Position<br>Chr. 7 | Symbol         | dbSNP                       | 129P2/OlaHsd               | C3H/HeJ               | NZO/HILtJ                     | Variant type             |
|--------------------|----------------|-----------------------------|----------------------------|-----------------------|-------------------------------|--------------------------|
| 30,872,402         | <i>Cd22</i>    | rs229282204;<br>rs214494659 | GATTCATTCATTC<br>ATTCATTC  | GATTCATTCATTC<br>ATTC | GATTCATTCATTC<br>ATTCATTCATTC | Intronic variant         |
| 44,818,214         | <i>Atf5</i>    | rs212982150;<br>rs258293738 | CTT                        | C                     | CTTTTTTTT                     | upstream gene<br>variant |
| 44,943,226         | <i>Tsk5</i>    | rs213087291;<br>rs243384591 | C                          | CG                    | CGGGG                         | 5'UTR variant            |
| 45,644,050         | <i>Mamstr</i>  | rs265585922                 | ACATACATACATA<br>CATACATAC | ACATACATAC            | AATACATACATAC                 | Intronic variant         |
| 45,696,569         | <i>Car11</i>   | rs229863154                 | GTTTGTTTGGT                | GT                    | GTTTGTTTGGT                   | upstream gene<br>variant |
| 45,906,491         | <i>Tmem143</i> | rs259428117                 | CTTT                       | CTT                   | CT                            | Intronic variant         |

**Table S4:** Previously published QTL for diabetes-related traits identified in crossbreedings with the NZO strain. Data were obtained from the online databases [www.diabetesitygenes.org](http://www.diabetesitygenes.org)<sup>1)</sup> and [www.obesitygenes.org](http://www.obesitygenes.org)<sup>2)</sup>. Chr, chromosome; bw, body weight; fat%, relative fat content; CI, confidence interval; BC, backcross, IC, intercross. Bold, overlap to present study.

| QTL name               | Chr.     | CI (Mbp)       | Trait          | Max. LOD    | Cross                      | Cross type | Reference                               |
|------------------------|----------|----------------|----------------|-------------|----------------------------|------------|-----------------------------------------|
| <i>Nob3</i>            | 1        | 104-195        | bw             | 16.1        | NZO/HIBomDife x C57BL/6JRI | IC         | Vogel <i>et al.</i> 2009                |
| <i>Nzoq1</i>           | 1        | 10-76          | bw             | 9.4         | NZO/HILt x NON/Lt          | BC         | Reifsynder <i>et al.</i> 2000           |
| <i>Obq7</i>            | 1        | 42-71          | fat%           | 6.9         | SM/J x NZO/HILt            | IC         | Taylor <i>et al.</i> 2001               |
| <i>Obq8</i>            | 1        | 122-162        | fat%           | 6.4         | SM/J x NZO/HILt            | IC         | Taylor <i>et al.</i> 2001               |
| <i>Obq9</i>            | 1        | 157-172        | fat%           | 6.7         | SM/J x NZO/HILt            | IC         | Taylor <i>et al.</i> 2001               |
| <i>D1Mit411</i>        | 1        | 26-76          | insulin        | 4.6         | NON/Lt x NZO/H1Lt          | BC         | Reifsynder <i>et al.</i> 2000           |
| <i>D1Mit411</i>        | 1        | 26-76          | glucose        | 4.9         | NON/Lt x NZO/H1Lt          | BC         | Reifsynder <i>et al.</i> 2000           |
| <i>Nob5</i>            | 1        | 133-168        | bw             | 3.6         | NZO/HIBomDife x C57BL/6JRI | BC         | Vogel <i>et al.</i> 2018                |
| <i>Obq10</i>           | 2        | 94-121         | fat%           | 7.9         | SM/J x NZO/HILt            | IC         | Taylor <i>et al.</i> 2001               |
| <i>Nidd1/36</i>        | 4        | 79-109         | glucose        | 6.5         | NZO/Hi x NON               | IC         | Leiter <i>et al.</i> 1998               |
| <b><i>Nidd/SJL</i></b> | <b>4</b> | <b>100-147</b> | <b>glucose</b> | <b>3.6</b>  | <b>NZO/HIBomDife x SJL</b> | <b>BC</b>  | <b>Plum <i>et al.</i> 2000</b>          |
| <i>D5Mit81</i>         | 5        | 50-109         | fat%           | 3.9         | NON/Lt x NZO/H1Lt          | BC         | Reifsynder <i>et al.</i> 2000           |
| <i>Nob1</i>            | 5        | 29-89          | bw             | 4.4         | NZO/HIBomDife x SJL        | BC         | Kluge <i>et al.</i> 2000                |
| <i>Nob1</i>            | 5        | 29-89          | fat weight     | 3.0         | NZO/HIBomDife x SJL        | BC         | Kluge <i>et al.</i> 2000                |
| <i>Obq11</i>           | 5        | 4-28           | fat%           | 4.4         | SM/J x NZO/HILt            | IC         | Taylor <i>et al.</i> 2001               |
| <i>Obq12</i>           | 5        | 38-56          | fat%           | 5.3         | SM/J x NZO/HILt            | IC         | Taylor <i>et al.</i> 2001               |
| <i>D6Mit275</i>        | 6        | 35-67          | bw             | 2.5         | NZO/HILt x NON/Lt          | BC         | Reifsynder <i>et al.</i> 2000           |
| <i>Obq13</i>           | 6        | 49-57          | fat%           | 9.3         | SM/J x NZO/HILt            | IC         | Taylor <i>et al.</i> 2001               |
| <i>Obq14</i>           | 6        | 94-107         | fat%           | 9.2         | SM/J x NZO/HILt            | IC         | Taylor <i>et al.</i> 2001               |
| <i>D6Mit275</i>        | 6        | 32-72          | insulin        | 1.9         | NZO/HILt x NON/Lt          | BC         | Reifsynder <i>et al.</i> 2000           |
| <i>Obq15</i>           | 7        | 75-99          | fat%           | 8.1         | SM/J x NZO/HILt            | IC         | Taylor <i>et al.</i> 2001               |
| <b><i>Dis1</i></b>     | <b>7</b> | <b>35-101</b>  | <b>insulin</b> | <b>13.1</b> | <b>NZO/Wehi x C57BL/6J</b> | <b>BC</b>  | <b>Andrikopoulos <i>et al.</i> 2016</b> |
| <i>D9Mit128</i>        | 9        | 32-61          | insulin        | 3.2         | NZO/Hi x NON               | IC         | Leiter <i>et al.</i> 1998               |
| <i>Nidd3/16</i>        | 11       | 20-105         | glucose        | 11.9        | NZO/Hi x NON               | IC         | Leiter <i>et al.</i> 1998               |
| <i>Nidd3/24.2</i>      | 11       | 20-105         | insulin        | 8.9         | NZO/Hi x NON               | IC         | Leiter <i>et al.</i> 1998               |
| <i>Nzoq2</i>           | 12       | 87-102         | bw             | 3.1         | NZO/HILt x NON/Lt          | BC         | Reifsynder <i>et al.</i> 2000           |
| <i>Nzoq2</i>           | 12       | 87-112         | fat%           | 4.9         | NZO/HILt x NON/Lt          | BC         | Reifsynder <i>et al.</i> 2000           |
| <i>D12Mit204</i>       | 12       | 79-89          | insulin        | 3.0         | NZO/Hi x NON               | IC         | Leiter <i>et al.</i> 1998               |
| <i>D15Mit26</i>        | 15       | 33-73          | bw             | 2.7         | NZO/HILt x NON/Lt          | BC         | Reifsynder <i>et al.</i> 2000           |
| <i>D15Mit159</i>       | 15       | 70-104         | insulin        | 3.6         | NZO/HILt x NON/Lt          | BC         | Reifsynder <i>et al.</i> 2000           |
| <i>Obq4b</i>           | 17       | 10-26          | fat%           | 8.8         | SM/J x NZO/HILt            | IC         | Taylor <i>et al.</i> 2001               |
| <i>D18Mit60</i>        | 18       | 17-49          | fat%           | 2.5         | NZO/HILt x NON/Lt          | BC         | Reifsynder <i>et al.</i> 2000           |
| <i>Nidd2</i>           | 18       | 12-45          | glucose        | 5.0         | NZO/Hi x NON               | IC         | Leiter <i>et al.</i> 1998               |



- <sup>1)</sup>Schmidt, C., N.P. Gonzaludo, S. Strunk, S. Dahm, J. Schuchhardt, F. Kleinjung, S. Wuschke, H.G. Joost, and H. Al-Hasani. 2008. A meta-analysis of QTL for diabetes-related traits in rodents. *Physiological genomics*. 34:42-53;
- <sup>2)</sup>Wuschke, S., S. Dahm, C. Schmidt, H. G. Joost and H. Al-Hasani, 2007 A meta-analysis of quantitative trait loci associated with body weight and adiposity in mice. *Int J Obes (Lond)* 31: 829-841.

## References:

- Andrikopoulos, S., B. C. Fam, A. Holdsworth, S. Visinoni, Z. Ruan *et al.*, 2016 Identification of ABCC8 as a contributory gene to impaired early-phase insulin secretion in NZO mice. *J Endocrinol* 228: 61-73.
- Kluge, R., K. Giesen, G. Bahrenberg, L. Plum, J. R. Ortlepp *et al.*, 2000 Quantitative trait loci for obesity and insulin resistance (Nob1, Nob2) and their interaction with the leptin receptor allele (LeprA720T/T1044I) in New Zealand obese mice. *Diabetologia* 43: 1565-1572.
- Leiter, E. H., P. C. Reifsnyder, K. Flurkey, H. J. Partke, E. Junger *et al.*, 1998 NIDDM genes in mice: deleterious synergism by both parental genomes contributes to diabetogenic thresholds. *Diabetes* 47: 1287-1295.
- Plum, L., R. Kluge, K. Giesen, J. Altmüller, J. R. Ortlepp *et al.*, 2000 Type 2 diabetes-like hyperglycemia in a backcross model of NZO and SJL mice: characterization of a susceptibility locus on chromosome 4 and its relation with obesity. *Diabetes* 49: 1590-1596.
- Reifsnyder, P. C., G. Churchill and E. H. Leiter, 2000 Maternal environment and genotype interact to establish diabetes in mice. *Genome Res* 10: 1568-1578.
- Taylor, B. A., C. Wnek, D. Schroeder and S. J. Phillips, 2001 Multiple obesity QTLs identified in an intercross between the NZO (New Zealand obese) and the SM (small) mouse strains. *Mamm Genome* 12: 95-103.
- Vogel, H., A. Kamitz, N. Hallahan, S. Lebek, T. Schallschmidt *et al.*, 2018 A collective diabetes cross in combination with a computational framework to dissect the genetics of human obesity and type 2 diabetes. *Hum Mol Genet.*
- Vogel, H., M. Nestler, F. Ruschendorf, M. D. Block, S. Tischer *et al.*, 2009 Characterization of Nob3, a major quantitative trait locus for obesity and hyperglycemia on mouse chromosome 1. *Physiol Genomics* 38: 226-232.

**Table S5:** Previously published QTL for diabetes-related traits identified in crossbreedings with 129 strains. Data were obtained from the online databases [www.diabetesgenes.org](http://www.diabetesgenes.org)<sup>1)</sup> and [www.obesitygenes.org](http://www.obesitygenes.org)<sup>2)</sup>. Chr, chromosome; bw, body weight; fat%, relative fat content; CI, confidence interval; BC, backcross, IC, intercross.

| QTL name         | Chr. | CI (Mbp) | Trait      | Max. LOD | Cross                        | Cross type | Reference                     |
|------------------|------|----------|------------|----------|------------------------------|------------|-------------------------------|
| <i>Obq2</i>      | 1    | 10-42    | fat%       | 6.0      | 129/SvEms-p+ x EL/Suz        | IC         | Taylor and Phillips 1996      |
| <i>Obq17</i>     | 1    | 112-143  | fat%       | 2.3      | C57BL/6J x 129S1/SvImJ       | IC         | Ishimori <i>et al.</i> 2004   |
| <i>D1Mit19</i>   | 1    | 39-107   | insulin    | 3.6      | C57BL/6J x 129/Sv            | IC         | Kido <i>et al.</i> 2000       |
| <i>D1Mit270</i>  | 1    | 153-193  | insulin    | 2.9      | PERA/Ei x C57BL/6.129S7-Ldlr | BC         | Seidelmann <i>et al.</i> 2005 |
| <i>Bwq5</i>      | 2    | 129-160  | bw         | 4.4      | 129P3/J x C57BL/6ByJ         | IC         | Reed <i>et al.</i> 2003       |
| <i>Adip2.2</i>   | 2    | 146-177  | fat weight | 3.1      | 129P3/J x C57BL/6ByJ         | IC         | Reed <i>et al.</i> 2003       |
| <i>D2Mit151</i>  | 2    | 13-145   | insulin    | 5.6      | C57BL/6J x 129/Sv            | IC         | Kido <i>et al.</i> 2000       |
| <i>D3Mit278</i>  | 3    | 52-92    | insulin    | 3.2      | C57BL/6J x 129S6/SvEvTac     | IC         | Almind and Kahn 2004          |
| <i>Mob2a</i>     | 6    | 0-31     | fat%       | 2.6      | C57BL/6J x 129S1/SvImJ       | IC         | Ishimori <i>et al.</i> 2004   |
| <i>D6Mit201</i>  | 6    | 127-150  | insulin    | 2.8      | C57BL/6J x 129/Sv            | IC         | Kido <i>et al.</i> 2000       |
| <i>Obq1</i>      | 7    | 54-86    | fat%       | 8.4      | 129/SvEms-p+ x EL/Suz        | IC         | Taylor and Phillips 1996      |
| <i>Obq16</i>     | 8    | 86-108   | fat%       | 10.0     | C57BL/6J x 129S1/SvImJ       | IC         | Ishimori <i>et al.</i> 2004   |
| <i>Bwq6</i>      | 9    | 95-124   | bw         | 4.0      | 129P3/J x C57BL/6ByJ         | IC         | Reed <i>et al.</i> 2003       |
| <i>Adip5a</i>    | 9    | 29-60    | fat weight | 4.0      | 129P3/J x C57BL/6ByJ         | IC         | Reed <i>et al.</i> 2003       |
| <i>D10Mit42</i>  | 10   | 48-102   | insulin    | 5.6      | C57BL/6J x 129/Sv            | IC         | Kido <i>et al.</i> 2000       |
| <i>D11Mit199</i> | 11   | 82-122   | insulin    | 3.0      | C57BL/6J x 129S6/SvEvTac     | IC         | Almind and Kahn 2004          |
| <i>D12Mit182</i> | 12   | 0-31     | fat%       | 2.9      | C57BL/6J x 129S1/SvImJ       | IC         | Ishimori <i>et al.</i> 2004   |
| <i>D12Mit231</i> | 12   | 55-95    | insulin    | 3.1      | C57BL/6J x 129/Sv            | IC         | Kido <i>et al.</i> 2000       |
| <i>D12Mit231</i> | 12   | 78-115   | glucose    | 2.7      | C57BL/6J x 129S6             | IC         | Almind <i>et al.</i> 2003     |
| <i>D13Mit144</i> | 13   | 77-117   | insulin    | 4.3      | PERA/Ei x C57BL/6.129S7-Ldlr | BC         | Seidelmann <i>et al.</i> 2005 |
| <i>D14Mit55</i>  | 14   | 9-49     | glucose    | 2.2      | C57BL/6J x 129S6             | IC         | Almind <i>et al.</i> 2003     |
| <i>D14Mit75</i>  | 14   | 92-117   | glucose    | 2.3      | C57BL/6J x 129S6             | IC         | Almind <i>et al.</i> 2003     |
| <i>D14Mit55</i>  | 14   | 9-49     | insulin    | 5.6      | C57BL/6J x 129S6             | IC         | Almind <i>et al.</i> 2003     |
| <i>D14Mit192</i> | 14   | 51-90    | glucose    | 3.3      | PERA/Ei x C57BL/6.129S7-Ldlr | BC         | Seidelmann <i>et al.</i> 2005 |
| <i>D14Mit52</i>  | 14   | 11-51    | insulin    | 3.0      | C57BL/6J x 129S6/SvEvTac     | IC         | Almind and Kahn 2004          |
| <i>D15Mit13</i>  | 15   | 0-23     | glucose    | 3.3      | C57BL/6J x 129S6/SvEvTac     | IC         | Almind and Kahn 2004          |
| <i>Adip9</i>     | 16   | 71-99    | fat weight | 3.3      | 129P3/J x C57BL/6ByJ         | IC         | Reed <i>et al.</i> 2003       |

<sup>1)</sup> Schmidt, C., N.P. Gonzaludo, S. Strunk, S. Dahm, J. Schuchhardt, F. Kleinjung, S. Wuschke, H.G. Joost and H. Al-Hasani. 2008. A meta-analysis of QTL for diabetes-related traits in rodents. *Physiological genomics*. 34:42-53;

<sup>2)</sup> Wuschke, S., S. Dahm, C. Schmidt, H. G. Joost and H. Al-Hasani, 2007 A meta-analysis of quantitative trait loci associated with body weight and adiposity in mice. *Int J Obes (Lond)* 31: 829-841.

## References

- Almind, K., and C. R. Kahn, 2004 Genetic determinants of energy expenditure and insulin resistance in diet-induced obesity in mice. *Diabetes* 53: 3274-3285.
- Almind, K., R. N. Kulkarni, S. M. Lannon and C. R. Kahn, 2003 Identification of interactive loci linked to insulin and leptin in mice with genetic insulin resistance. *Diabetes* 52: 1535-1543.
- Ishimori, N., R. Li, P. M. Kelmenson, R. Korstanje, K. A. Walsh *et al.*, 2004 Quantitative trait loci that determine plasma lipids and obesity in C57BL/6J and 129S1/SvImJ inbred mice. *J Lipid Res* 45: 1624-1632.
- Kido, Y., N. Philippe, A. A. Schaffer and D. Accili, 2000 Genetic modifiers of the insulin resistance phenotype in mice. *Diabetes* 49: 589-596.
- Reed, D. R., X. Li, A. H. McDaniel, K. Lu, S. Li *et al.*, 2003 Loci on chromosomes 2, 4, 9, and 16 for body weight, body length, and adiposity identified in a genome scan of an F2 intercross between the 129P3/J and C57BL/6ByJ mouse strains. *Mamm Genome* 14: 302-313.
- Seidemann, S. B., C. De Luca, R. L. Leibel, J. L. Breslow, A. R. Tall *et al.*, 2005 Quantitative trait locus mapping of genetic modifiers of metabolic syndrome and atherosclerosis in low-density lipoprotein receptor-deficient mice: identification of a locus for metabolic syndrome and increased atherosclerosis on chromosome 4. *Arterioscler Thromb Vasc Biol* 25: 204-210.
- Taylor, B. A., and S. J. Phillips, 1996 Detection of obesity QTLs on mouse chromosomes 1 and 7 by selective DNA pooling. *Genomics* 34: 389-398.

**Table S6:** Previously published QTL for diabetes-related traits identified in crossbreedings with the C3H/He strain. Data were obtained from the online databases [www.diabetesgenes.org](http://www.diabetesgenes.org)<sup>1)</sup>. Chr, chromosome; bw, body weight; CI, confidence interval; IC, intercross. IPGTT, interperitoneal glucose tolerance test; Bold, overlap to present study.

| QTL name              | Chr.     | CI (Mbp)      | Trait        | Max. LOD   | Cross                    | Cross type | Reference                      |
|-----------------------|----------|---------------|--------------|------------|--------------------------|------------|--------------------------------|
| <i>D2Mit48</i>        | 2        | 136-176       | IPGTT        | 8.3        | C57BL/6J x C3H/He        | IC         | Kayo <i>et al.</i> 2000        |
| <b><i>D4Mit15</i></b> | <b>4</b> | <b>46-129</b> | <b>IPGTT</b> | <b>5.4</b> | <b>C57BL/6J x C3H/He</b> | <b>IC</b>  | <b>Kayo <i>et al.</i> 2000</b> |
| <i>Nidd3nsyins</i>    | 6        | 108-148       | insulin      | 4.7        | NSY x C3H/He             | IC         | Ueda <i>et al.</i> 1999        |
| <i>Nidd3nsy36</i>     | 6        | 108-148       | IPGTT        | 2.7        | NSY x C3H/He             | IC         | Ueda <i>et al.</i> 1999        |
| <i>Gluhos3</i>        | 9        | 20-59         | IPGTT        | 6.7        | C57BL/6J x C3H/He        | IC         | Toye <i>et al.</i> 2005        |
| <i>Nidd1nsy24</i>     | 11       | 45-85         | IPGTT        | 9.5        | NSY x C3H/He             | IC         | Ueda <i>et al.</i> 1999        |
| <i>Nidd4nsy</i>       | 11       | 0-36          | IPGTT        | 5.8        | NSY x C3H/He             | IC         | Ueda <i>et al.</i> 1999        |
| <i>Gluhos2</i>        | 11       | 0-68          | IPGTT        | 5.2        | C57BL/6J x C3H/He        | IC         | Toye <i>et al.</i> 2005        |
| <i>D13Mit148</i>      | 13       | 90-121        | IPGTT        | 4.2        | C57BL/6J x C3H/He        | IC         | Kayo <i>et al.</i> 2000        |
| <i>Gluhos1</i>        | 13       | 92-120        | IPGTT        | 5.0        | C57BL/6J x C3H/He        | IC         | Toye <i>et al.</i> 2005        |
| <i>D13Mit262</i>      | 13       | 94-121        | IPGTT        | 4.8        | C57BL/6J x C3H/He        | IC         | Toye <i>et al.</i> 2005        |
| <i>Nidd2nsyins</i>    | 14       | 35-74         | insulin      | 4.5        | NSY x C3H/He             | IC         | Ueda <i>et al.</i> 1999        |
| <i>Nidd2nsy24</i>     | 14       | 35-74         | IPGTT        | 3.6        | NSY x C3H/He             | IC         | Ueda <i>et al.</i> 1999        |

<sup>1)</sup> Schmidt, C., N.P. Gonzaludo, S. Strunk, S. Dahm, J. Schuchhardt, F. Kleinjung, S. Wuschke, H.G. Joost, and H. Al-Hasani. 2008. A meta-analysis of QTL for diabetes-related traits in rodents. *Physiological genomics*. 34:42-53.

## References

- Kayo, T., H. Fujita, J. Nozaki, X. E and A. Koizumi, 2000 Identification of two chromosomal loci determining glucose intolerance in a C57BL/6 mouse strain. *Comp Med* 50: 296-302.
- Toye, A. A., J. D. Lippiat, P. Proks, K. Shimomura, L. Bentley et al., 2005 A genetic and physiological study of impaired glucose homeostasis control in C57BL/6J mice. *Diabetologia* 48: 675-686.
- Ueda, H., H. Ikegami, Y. Kawaguchi, T. Fujisawa, E. Yamato et al., 1999 Genetic analysis of late-onset type 2 diabetes in a mouse model of human complex trait. *Diabetes* 48: 1168-1174.
