# Supplementary material
Source: publisher figshare collection journal article supplement (https://gsajournals.figshare.com/articles/dataset/_/7066604)
Supplement: Supplementary file 1 [file 1]

## Sheet: N2(NZOxC3H) males
Maus ID	Body weight wk3	Body weight wk4	Body weight wk5	Body weight wk6	Body weight wk7	Body weight wk8	Body weight wk9	Body weight wk10	Body weight wk11	Body weight wk12	Body weight wk13	Body weight wk14	Body weight wk15	Body weight wk16	Body weight wk17	Body weight wk18	Body weight wk19	Body weight wk20	Blood glucose wk3	Blood glucose wk4	Blood glucose wk5	Blood glucose wk6	Blood glucose wk7	Blood glucose wk8	Blood glucose wk9	Blood glucose wk10	Blood glucose wk11	Blood glucose wk12	Blood glucose wk13	Blood glucose wk14	Blood glucose wk15	Blood glucose wk16	Blood glucose wk17	Blood glucose wk18	Blood glucose wk19	Blood glucose wk20	log2 Blood glucose wk3	log2 Blood glucose wk4	log2 Blood glucose wk5	log2 Blood glucose wk6	log2 Blood glucose wk7	log2 Blood glucose wk8	log2 Blood glucose wk9	log2 Blood glucose wk10	log2 Blood glucose wk11	log2 Blood glucose wk12	log2 Blood glucose wk13	log2 Blood glucose wk14	log2 Blood glucose wk15
85_m1	10.7	20.1	30.5	38.7	43.6	47.1	49	51.2	53.6	57.7	61.7	63.9	67.8	66.7	67.9	67.8	71.5	75	147	220	172	178	228	159	315	180	251	279	318	289	382	222	219	339	255	225	7.19967	7.78136	7.42626	7.47573	7.83289	7.31288	8.29921	7.49185	7.97154	8.12412	8.31288	8.17493	8.57743
86_m2	10.7	19.9	29.8	36.7	40.2	43.8	45.3	48.8	49.7	54.1	57.1	59	57.5	57.1	59.8	62.5	65	65.9	144	259	240	140	209	230	215	348	248	236	406	250	279	237	156	266	366	250	7.16993	8.01681	7.90689	7.12928	7.70736	7.84549	7.74819	8.44294	7.9542	7.88264	8.66534	7.96578	8.12412
87_m3	11.5	21.2	31.5	38.8	43.4	46.4	49	32.3	55	58.5	61.5	63	65.5	66.3	67.4	69.3	71.3	72.4	138	217	234	242	190	227	201	235	205	206	238	233	224	191	126	196	193	240	7.10852	7.76155	7.87036	7.91886	7.56986	7.82655	7.65105	7.87652	7.67948	7.6865	7.89482	7.86419	7.80735
88_m4	10.7	20.7	20.7	38.2	43.2	46.4	49.4	52	53.5	57.3	59.7	59.8	60.3	59.6	61.8	60.7	60.5	61.9	121	195	203	176	356	249	239	250	374	355	423	452	395	500	343	311	427	405	6.91886	7.60733	7.66534	7.45943	8.47573	7.96	7.90087	7.96578	8.54689	8.47168	8.72451	8.82018	8.62571
89_m5	12.3	22.8	33	38.3	41.3	43.5	44.4	48.5	49.2	50.8	53.6	53.9	54.1	54.3	53.9	53.1	52.7	53.8	132	212	318	224	223	231	350	514	466	518	556	599	574	513	557	563	589	516	7.04439	7.72792	8.31288	7.80735	7.8009	7.85175	8.45121	9.00562	8.86419	9.01681	9.11894	9.22641	9.16491
90_m6	8.9	17.3	25.3	32.8	36.1	38.7	40.4	44	45.6	48.6	51.3	52.8	54.8	56.1	58.5	59.1	59.5	60.6	115	223	230	196	165	283	234	276	248	318	364	405	497	418	449	499	418	414	6.84549	7.8009	7.84549	7.61471	7.36632	8.14466	7.87036	8.10852	7.9542	8.31288	8.50779	8.66178	8.9571
95_m1	11.9	23.3	35.6	41.7	45.8	48.5	50.5	53.8	58	64.3	67.7	69.9	71.9	73.5	75.3	77	77.9	79.9	134	210	191	287	400	449	296	226	276	469	444	318	214	320	207	276	182	219	7.06609	7.71425	7.57743	8.16491	8.64386	8.81057	8.20945	7.82018	8.10852	8.87344	8.79442	8.31288	7.74147
96_m2	10.9	21.4	34.1	41.7	47.4	49.9	49.6	53.3	54.7	58	58.8	61.2	62.5	62.8	63.4	63.4	63.6	62.9	118	212	208	254	484	539	571	600	600	600	600	600	600	600	600	600	600	566	6.88264	7.72792	7.70044	7.98868	8.91886	9.07414	9.15735	9.22882	9.22882	9.22882	9.22882	9.22882	9.22882
97_m3	10.1	19.2	30.8	39.9	44.5	48.3	50.8	53.2	52.2	52.6	49.9	50.7	50.4	52.5	51	50.2			115	234	199	350	519	553	600	598	549	600	600	600	600	600	591	600			6.84549	7.87036	7.63662	8.45121	9.01959	9.11114	9.22882	9.224	9.10066	9.22882	9.22882	9.22882	9.22882
98_m4	12	21.1	31.5	39.7	44.6	48.1	51	55.1	58.9	62.6	58.4	51.7							125	198	192	219	244	336	263	365	414	600	522	498							6.96578	7.62936	7.58496	7.77479	7.93074	8.39232	8.03892	8.51175	8.69349	9.22882	9.02791	8.96
99_m5	11.5	21	31.1	36.2	39	40.6	43	47	48.9	52.1	54.6	56.8	57.9	59.5	60.5	62.4	63.6	64.6	133	226	171	214	142	176	221	201	182	215	320	267	237	333	218	332	298	274	7.05528	7.82018	7.41785	7.74147	7.14975	7.45943	7.7879	7.65105	7.50779	7.74819	8.32193	8.0607	7.88874
105_m1	13.7	25.3	36.1	43.3	47.3	50.1	52.8	55.8	56	58	53.6								126	195	201	183	339	404	442	517	556	600	471								6.97728	7.60733	7.65105	7.5157	8.40514	8.65821	8.7879	9.01402	9.11894	9.22882	8.87958
106_m2	9.3	18.8	28.7	35.6	39.7	42.6	46.2	48.3	50.4	54.1	56	58.3	59.2	59.5	61.5	63.1	64.3	65.7	123	236	243	220	171	192	184	196	184	182	169	173	175	185	254	176	176	167	6.94251	7.88264	7.92481	7.78136	7.41785	7.58496	7.52356	7.61471	7.52356	7.50779	7.40088	7.43463	7.45121
107_m3	14.4	26.7	38.3	44.1	49.3	52.3	55.9	60.4	62	65.2									120	209	207	205	397	419	363	477	497	588									6.90689	7.70736	7.69349	7.67948	8.633	8.71081	8.50383	8.89785	8.9571	9.19967
108_m4	14.1	24.9	35.4	41.1	45.9	49.5	52.1	56.8	60.6	65.2	69.2	71.5	73.6	77.4	81.3	84.5	87.3	89.8	117	254	216	156	215	236	294	305	463	364	384	423	407	404	430	515	478	416	6.87036	7.98868	7.75489	7.2854	7.74819	7.88264	8.19967	8.25267	8.85487	8.50779	8.58496	8.72451	8.66888
109_m5	9.7	19.5	31.7	39.1	42.8	46.4	49.2	51.7	53.1	56.4	58.9	59.3	60.2	61.5	62.8	64.5	66.2	68.4	110	189	187	185	224	189	142	156	169	145	148	157	124	235	164	144	179	188	6.78136	7.56224	7.54689	7.53138	7.80735	7.56224	7.14975	7.2854	7.40088	7.17991	7.20945	7.29462	6.9542
110_m1	15.4	26.9	37.9	45.6	50.5	54.7	55.8	61.5	64.8	69.2	72.9	76.5	78.8	82.4	85	88.2	89.6	93.8	136	249	186	224	289	337	257	350	349	371	410	330	373	358	393	477	231	420	7.08746	7.96	7.53916	7.80735	8.17493	8.3966	8.00562	8.45121	8.44708	8.53528	8.67948	8.36632	8.54303
111_m2	10.8	19.7	29.4	36.8	43.6	47.7	48.4	50	50.4	50.2	50.9	51.4	51.9	52.5	52.6	52	51.9	50.4	140	249	229	278	559	568	600	600	600	600	600	600	600	600	600	600	506	470	7.12928	7.96	7.8392	8.11894	9.1267	9.14975	9.22882	9.22882	9.22882	9.22882	9.22882	9.22882	9.22882
112_m3	13.7	25.4	36	42.6	46.7	49.8	51.5	54.9	56.9	60	61.6	64.5	51.8	69.7	70.7	72.1	74.3	77.7	131	282	252	216	196	211	252	258	296	217	221	356	589	352	299	272	246	303	7.03342	8.13955	7.97728	7.75489	7.61471	7.7211	7.97728	8.01123	8.20945	7.76155	7.7879	8.47573	9.20212
113_m4	10	19.6	30.8	40.5	45.7	50.6	52.6	57.6	58.6	63.9	64.6	67.9	72.2	70.2	68.3	72.3	74.9	77.6	140	208	220	209	307	337	257	396	293	418	254	328	393	407	160	276	181	183	7.12928	7.70044	7.78136	7.70736	8.26209	8.3966	8.00562	8.62936	8.19476	8.70736	7.98868	8.35755	8.61839
114_m5	11.4	21.3	30.3	37.5	41.5	45.3	46.6	49.9	51.1	53.9	56.7	59.2	62.6	65	67.3	67.8	70.5	72.5	109	267	205	197	182	227	201	176	195	277	243	251	428	349	382	324	215	259	6.76818	8.0607	7.67948	7.62205	7.50779	7.82655	7.65105	7.45943	7.60733	8.11374	7.92481	7.97154	8.74147
126_m1	7.7	17	27.1	34.4	38	41.3	44	46.2	48.2	52.5	54.9	56.3	56.3	56.2	58.4	59.9	60.2	60.7	94	193	220	243	287	197	269	173	207	157	150	139	172	149	170	143	152	150	6.55459	7.59246	7.78136	7.92481	8.16491	7.62205	8.07146	7.43463	7.69349	7.29462	7.22882	7.11894	7.42626
127_m2	10.9	20.4	28.9	34	36.1	39.9	41.4	43.3	45.4	48.6	48.9	50.1	50.5	52.1	52.6	53	53.9	54.2	139	294	226	259	186	169	166	175	249	178	164	149	146	162	152	143	146	150	7.11894	8.19967	7.82018	8.01681	7.53916	7.40088	7.37504	7.45121	7.96	7.47573	7.35755	7.21917	7.18982
128_m3	8.6	17.7	26.4	33	35.8	38.7	39.4	42.6	44.7	48.8	50.8	53.1	54.6	57.5	58.9	60.9	63.3	65.1	121	228	200	290	250	218	199	175	214	202	167	159	202	190	219	188	272	281	6.91886	7.83289	7.64386	8.17991	7.96578	7.76818	7.63662	7.45121	7.74147	7.65821	7.3837	7.31288	7.65821
129_m4	7.6	16.6	25.6	34	38.9	43.2	44.3	45.1	45.6	48.8	50.8	53.5	53.7	54.8	56.8	57.4	58.8	61.2	124	220	222	246	176	239	209	201	261	171	153	209	208	169	248	168	175	239	6.9542	7.78136	7.79442	7.94251	7.45943	7.90087	7.70736	7.65105	8.02791	7.41785	7.25739	7.70736	7.70044
130_m5	10.4	19.3	28.2	33.9	36.7	40.1	42.4	45.6	47.5	52	54	56.8	57.3	58.7	61.1	62.5	64.2	66.5	112	232	249	296	213	294	178	167	236	171	198	201	186	173	160	162	173	175	6.80735	7.85798	7.96	8.20945	7.73471	8.19967	7.47573	7.3837	7.88264	7.41785	7.62936	7.65105	7.53916
131_m6	8.6	17.2	25.7	33	36.9	39.9	41.2	43.3	45.8	49.5	51.3	54.4	55.8	57.8	60.1	61.8	63.8	65.3	90	159	226	172	155	203	182	159	301	329	351	496	443	407	503	432	417	486	6.49185	7.31288	7.82018	7.42626	7.27612	7.66534	7.50779	7.31288	8.23362	8.36194	8.45533	8.9542	8.79116
132_m1	10.6	21.9	31.9	39.1	43	47.3	48.6	52.3	54.6	58.8	61.4	61.8	62.9	62.5	62.1	62.8	63.1	61.6	110	183	201	189	155	229	225	230	295	359	524	536	600	600	559	569	593	550	6.78136	7.5157	7.65105	7.56224	7.27612	7.8392	7.81378	7.84549	8.20457	8.48784	9.03342	9.06609	9.22882
133_m2	10.5	19.5	29.5	35.1	38.3	41.9	43.2	46.9	49.4	52.9	56	57.6	59.6	62.2	63.9	65.4	67.2	69	111	193	179	294	184	174	187	206	199	158	202	195	248	275	242	298	289	320	6.79442	7.59246	7.48382	8.19967	7.52356	7.44294	7.54689	7.6865	7.63662	7.30378	7.65821	7.60733	7.9542
134_m3	7.7	16.3	25.6	33.2	35.8	39.8	41.6	44.9	46.4	49.4	52	53.7	54.9	56.6	57.7	59.3	60.9	63.3	92	186	237	194	146	289	164	192	200	181	170	180	219	303	234	342	286	270	6.52356	7.53916	7.88874	7.59991	7.18982	8.17493	7.35755	7.58496	7.64386	7.49985	7.40939	7.49185	7.77479
135_m4	9.5	19.5	29.4	35	38.5	41.5	43.8	47.6	48.5	52.3	55.5	56.6	58.8	61	63	64.3	66.1	67.3	94	233	241	249	169	280	218	177	180	180	215	231	178	258	183	224	235	172	6.55459	7.86419	7.91289	7.96	7.40088	8.12928	7.76818	7.46761	7.49185	7.49185	7.74819	7.85175	7.47573
136_m5	9.6	19.7	31	38.3	42.7	47.4	48.1	51.6	52.7	55.7	59	62.1	63.1	65.8	67.4	69.4	70.5	73	110	210	261	245	203	218	239	172	176	135	254	334	158	217	163	255	236	272	6.78136	7.71425	8.02791	7.93664	7.66534	7.76818	7.90087	7.42626	7.45943	7.07682	7.98868	8.3837	7.30378
137_m6	8	16.9	25.7	32.3	35.5	38.3	40.9	45.4	45.7	49.2	53.9	55.6	57	59.6	61	62.4	63.6	64.8	102	224	204	211	137	188	250	206	190	176	167	165	152	176	150	222	125	152	6.67243	7.80735	7.67243	7.7211	7.09803	7.55459	7.96578	7.6865	7.56986	7.45943	7.3837	7.36632	7.24793
141_m1	13.6	22	33.3	42.1	46.3	51.8	52.3	56.6	59.2	63.1	67	68.9	72.3	73.7	76.5	78.1	80.2	83.4	167	215	292	184	175	172	150	196	217	231	285	421	307	281	396	325	238	245	7.3837	7.74819	8.18982	7.52356	7.45121	7.42626	7.22882	7.61471	7.76155	7.85175	8.15482	8.71768	8.26209
142_m2	11.2	18.7	28.9	38.4	42	46.6	47.6	51.7	52.7	58.1	61.6	64.7	67.5	68	70.9	70.9	73.3	75.5	150	214	224	215	211	279	223	258	260	325	428	424	379	442	358	329	346	285	7.22882	7.74147	7.80735	7.74819	7.7211	8.12412	7.8009	8.01123	8.02237	8.3443	8.74147	8.72792	8.56605
143_m3	12.3	21.8	32.1	38.5	41.2	46.1	46.8	51.7	52.7	56.5	58.2	59.3	60	61.5	61.3	61.5	61.6	61.1	153	169	200	140	225	430	148	424	302	585	529	539	600	600	598	549	600	547	7.25739	7.40088	7.64386	7.12928	7.81378	8.74819	7.20945	8.72792	8.2384	9.19229	9.04712	9.07414	9.22882
144_m4	12.4	20.2	29.5	37.1	42.3	46.6	48.1	51.8	53.7	58.1	61.7	63.8	65.2	67.4	69.9	72.6	73.9	76.7	199	189	279	233	207	205	210	175	233	337	328	351	353	400	446	356	323	279	7.63662	7.56224	8.12412	7.86419	7.69349	7.67948	7.71425	7.45121	7.86419	8.3966	8.35755	8.45533	8.46352
145_m5	10.9	18.5	25.6	34.5	39.6	45.6	47	51.7	54.1	58.3	60.4	61.4	61.4	62.9	63.5	62.9	62.9	63.2	166	212	250	208	165	396	249	405	536	600	600	600	600	600	600	600	600	600	7.37504	7.72792	7.96578	7.70044	7.36632	8.62936	7.96	8.66178	9.06609	9.22882	9.22882	9.22882	9.22882
149_m5	8.9			32.8				41.2	41		46.2		52.1	52.9	55.8	58	59.2	62.2	124			285				161	227		201		161	151	204	226	231	172	6.9542			8.15482				7.33092	7.82655		7.65105		7.33092
151_m1	7.3	13.8	24	30.7	33.9	37.7	38.3	40.4	41.8	43.5	44.6	45.5	46.4	46.4	46.6	47.1	48.5	49.7	120	175	198	217	168	144	190	148	180	161	145	201	140	127	162	150	132	137	6.90689	7.45121	7.62936	7.76155	7.39232	7.16993	7.56986	7.20945	7.49185	7.33092	7.17991	7.65105	7.12928
152_m2	9.8	17.4	26.9	34	38.1	43.1	43.4	46.8	49.1	51.1	53.1	55.2	57.1	58.6	60.2	62.6	63.7	66	141	229	273	244	181	230	186	132	218	188	264	284	233	386	248	271	308	374	7.13955	7.8392	8.09276	7.93074	7.49985	7.84549	7.53916	7.04439	7.76818	7.55459	8.04439	8.14975	7.86419
153_m3	8.9	15	24.7	29.5	32.1	38.2	38.6	43.8	45.8	49.2	52.9	54.5	57	59.8	61.7	64	66.1	67.2	126	178	225	197	142	125	218	151	196	195	326	243	206	350	206	272	212	184	6.97728	7.47573	7.81378	7.62205	7.14975	6.96578	7.76818	7.2384	7.61471	7.60733	8.34873	7.92481	7.6865
154_m4	7.5	15	24.8	32.2	34.8	39.2	39.2	43	46.4	48.2	50.6	51.8	54.4	55.2	56.1	56.9	57	58.4	141	198	261	207	178	143	239	149	248	188	442	494	511	516	477	517	517	584	7.13955	7.62936	8.02791	7.69349	7.47573	7.15987	7.90087	7.21917	7.9542	7.55459	8.7879	8.94837	8.99718
155_m1	8.9	15.9	24.6	31	33.9	38.5	38.8	42.1	45.2	48.9	52	54.1	56.2	58.8	60.9	61.8	64.7	66.5	123	265	207	192	188	197	213	176	175	184	194	203	159	293	217	194	257	230	6.94251	8.04985	7.69349	7.58496	7.55459	7.62205	7.73471	7.45943	7.45121	7.52356	7.59991	7.66534	7.31288
156_m2	7.5	13.6	21.3	27.4	29.9	31.3	32	33.3	35.6	37.6	40.1	43.1	46.4	47.5	50.1	51.1	53.1	54.9	119	185	245	182	202	236	196	123	179	165	160	147	159	104	115	127	188	158	6.89482	7.53138	7.93664	7.50779	7.65821	7.88264	7.61471	6.94251	7.48382	7.36632	7.32193	7.19967	7.31288
157_m3	8.4	15.3	25.3	34.4	38.3	42.3	42.6	45.6	47.4	50.5	54.2	56.2	58.3	60	61.9	64.1	66.4	68.2	137	186	223	176	176	411	245	165	277	427	496	470	364	299	375	319	389	396	7.09803	7.53916	7.8009	7.45943	7.45943	8.68299	7.93664	7.36632	8.11374	8.73809	8.9542	8.87652	8.50779
163_m1	16.5	26.6	38.4	42.1	46.6	47.6	49.3	53.2	55.2	59.2	61.3	63.6	66.1	66.9	68.8	69.9	71.6	72.6	173	278	209	209	202	169	192	193	416	506	489	547	553	435	528	463	490	272	7.43463	8.11894	7.70736	7.70736	7.65821	7.40088	7.58496	7.59246	8.70044	8.98299	8.93369	9.0954	9.11114
164_m2	15.6	25.3	34.4	37.9	43.5	45.7	47.6	49	51.7	56.1	58.8	61.3	62.6	63.7	66.6	67.9	68.1	70.6	173	246	238	214	187	229	249	177	256	375	288	424	187	301	231	270	213	254	7.43463	7.94251	7.89482	7.74147	7.54689	7.8392	7.96	7.46761	8	8.55075	8.16993	8.72792	7.54689
165_m3	11.8	19	30.4	36.1	42.3	43.4	45.2	49.7	53.5	57.1	59.2	60.8	62.2	62.5	64.7	64.9	66.3	67.8	140	251	205	218	164	158	170	201	146	269	236	203	244	201	266	236	265	263	7.12928	7.97154	7.67948	7.76818	7.35755	7.30378	7.40939	7.65105	7.18982	8.07146	7.88264	7.66534	7.93074
166_m4	12	18.9	32.8	39	48.3	52.7	55.5	60.2	63.6	69.3	71.9	77	79.7	82	86.4	88.5	92.2	95.3	139	257	194	173	355	291	234	322	453	439	412	435	306	288	332	376	361	236	7.11894	8.00562	7.59991	7.43463	8.47168	8.18488	7.87036	8.33092	8.82337	8.77808	8.6865	8.76487	8.25739
172_m1	12.3	19.5	28.6	30.7	36.7	35.2	36.4	40.3	42.4	46.3	49.3	52.5	54	56	57.5	59.5	61.3	64.1	128	199	169	280	176	175	200	153	192	186	160	214	201	198	245	266	222	290	7	7.63662	7.40088	8.12928	7.45943	7.45121	7.64386	7.25739	7.58496	7.53916	7.32193	7.74147	7.65105
173_m2	11	19.3	31.3	34.8	40.2	42.8	43.9	46.2	48.9	52.4	54.7	57.2	59.6	62.9	65.5	67.6	68.9	71.5	141	218	243	214	193	165	219	175	183	139	184	190	160	172	220	263	197	231	7.13955	7.76818	7.92481	7.74147	7.59246	7.36632	7.77479	7.45121	7.5157	7.11894	7.52356	7.56986	7.32193
174_m3	11.7	22.1	37.5	42.3	49.1	50	51.2	54.8	58.8	63.5	66.2	69.2	72.7	75.1	76.3	77.1	79.1	80.6	114	188	218	207	517	274	252	282	333	395	394	465	426	454	329	343	336	197	6.83289	7.55459	7.76818	7.69349	9.01402	8.09803	7.97728	8.13955	8.37938	8.62571	8.62205	8.86109	8.73471
175_m4	11.8	20	31.4	34.3	39.5	39.6	40.6	45.3	48.5	52.4	55.6	58.9	61.7	64.8	66.9	68.4	69.7	74.9	134	180	202	275	143	126	237	232	158	215	270	235	354	324	283	262	226	240	7.06609	7.49185	7.65821	8.10329	7.15987	6.97728	7.88874	7.85798	7.30378	7.74819	8.07682	7.87652	8.46761
181_m1	9.5	17.5	32.2	37.5	45.6	48.5	51.2	55.5	59.4	65.7	71.1	73.7	78.1	81.1	80.1	78.8	81.2	82.3	111	217	230	232	200	220	231	250	273	499	552	406	510	371	475	538	600	600	6.79442	7.76155	7.84549	7.85798	7.64386	7.78136	7.85175	7.96578	8.09276	8.9629	9.10852	8.66534	8.99435
182_m2	12	20.4	34.1	37.2	42.5	43.5	45.3	48.9	52.2	56	57.8	60.3	62.8	63.8	66.9	69.2	72.5	73	113	269	232	232	176	158	237	214	205	315	299	333	307	189	290	231	332	187	6.82018	8.07146	7.85798	7.85798	7.45943	7.30378	7.88874	7.74147	7.67948	8.29921	8.224	8.37938	8.26209
183_m3	12.6	22.3	37.3	39.9	39.7	40.4	40.6	44.8	48.8	50.3	51.6	54	56.8	59.2	62.9	64.9	65.8	67.2	113	194	202	219	153	156	151	209	166	190	165	143	142	139	207	159	242	183	6.82018	7.59991	7.65821	7.77479	7.25739	7.2854	7.2384	7.70736	7.37504	7.56986	7.36632	7.15987	7.14975
184_m4	11	19.1	31.1	32.8	36.3	38.5	38.6	43	48	50.4	54.9	58.7	60.9	64.6	65.6	65.3	67.3	71.3	106	217	221	121	177	162	163	189	164	173	186	165	218	180	170	166	179	190	6.72792	7.76155	7.7879	6.91886	7.46761	7.33985	7.34873	7.56224	7.35755	7.43463	7.53916	7.36632	7.76818
189_m1	9	17.3	27.9	35.6	41.7	49	50.3	55.4	59.2	63.6	66	64.6	56.3	53.7	44.7				126	185	268	323	284	363	307	466	523	517	546	534	461	554	600				6.97728	7.53138	8.06609	8.33539	8.14975	8.50383	8.26209	8.86419	9.03067	9.01402	9.09276	9.0607	8.84862
190_m2	8.2	16.7	26.5	31.1	35.4	40.4	42.1	47.3	50.8	53.3	54.8	54.9	54.5	53.4	51.6	51.4	50.1	49.7	116	212	223	257	203	187	177	240	386	501	600	597	600	600	600	600	600	600	6.85798	7.72792	7.8009	8.00562	7.66534	7.54689	7.46761	7.90689	8.59246	8.96867	9.22882	9.22159	9.22882
191_m3	9.2	17.7	28.4	34.1	37.8	44.7	47.3	51.8	55.9	60	62.6	65.4	69	68.9	71.8	74	77.1	80.9	129	167	209	253	224	201	146	267	237	425	489	471	457	289	378	265	254	232	7.01123	7.3837	7.70736	7.98299	7.80735	7.65105	7.18982	8.0607	7.88874	8.73132	8.93369	8.87958	8.83605
192_m4	8	16.2	26.4	32.6	35.4	40.2	43.7	47.3	50.3	52	52.7	53.1	52.9	53.3	53.4	53.8	53	53.5	101	215	222	199	194	196	323	412	548	560	600	600	595	581	600	600	600	600	6.65821	7.74819	7.79442	7.63662	7.59991	7.61471	8.33539	8.6865	9.09803	9.12928	9.22882	9.22882	9.21675
198_m1	10.5	19	31.3	37.3	43.2	46.2	49.3	52.9	56.8	57.4	58.7	61	62.5	64.3	66.1	68.2	69.3	72.2	125	232	220	227	190	184	221	186	216	220	187	285	198	234	253	284	240	216	6.96578	7.85798	7.78136	7.82655	7.56986	7.52356	7.7879	7.53916	7.75489	7.78136	7.54689	8.15482	7.62936
199_m2	10.4	17.7	27.7	30.1	32.5	32.9	35.7	38.6	41.5	45.3	47.5	49.4	52.3	53.8	55.5	57.5	60.1	62.5	115	207	233	190	151	128	171	167	160	152	228	196	310	312	338	363	402	383	6.84549	7.69349	7.86419	7.56986	7.2384	7	7.41785	7.3837	7.32193	7.24793	7.83289	7.61471	8.27612
200_m3	9.4	16.9	27.8	34.8	42.1	45.8	48.3	52.2	56.5	58.5	59.8	62.8	65.4	66.2	69.1	70.5	72.5	74.7	104	168	186	328	195	228	170	210	209	150	218	284	197	206	357	217	305	250	6.70044	7.39232	7.53916	8.35755	7.60733	7.83289	7.40939	7.71425	7.70736	7.22882	7.76818	8.14975	7.62205
201_m4	11	18.3	29.2	31.6	36	39.1	40.2	43.7	46.9	51.4	52.7	55.4	56.2	57.1	58.6	58.6	59.9	60.1	112	196	244	176	146	212	183	225	179	224	262	347	446	525	465	571	517	583	6.80735	7.61471	7.93074	7.45943	7.18982	7.72792	7.5157	7.81378	7.48382	7.80735	8.03342	8.43879	8.8009
207_m1	13.7	24.8	35	42.5	48	51.3	53.8	56.7	60.2	61.9	63.6	65.2	67.6	68.4	69.8	69.8	69.6	72.5	142	261	206	363	275	330	404	444	479	489	600	461	600	458	543	600	498	438	7.14975	8.02791	7.6865	8.50383	8.10329	8.36632	8.65821	8.79442	8.90388	8.93369	9.22882	8.84862	9.22882
208_m2	13.2	25.2	33.5	39.2	45.6	49.4	52.4	55.3	59.5	62.6	63.9	67	67.1	69.7	74.3	76.8	81.3	84	158	270	259	206	259	179	191	232	326	301	223	398	191	216	344	287	323	261	7.30378	8.07682	8.01681	7.6865	8.01681	7.48382	7.57743	7.85798	8.34873	8.23362	7.8009	8.63662	7.57743
209_m3	9.4	19	26.3	31.2	36.7	39.3	41.3	44	47.8	49.4	51	52.6	54.8	57	57.7	57.4	57.7	59.5	117	205	264	151	178	178	265	294	381	397	460	533	540	546	589	600	600	600	6.87036	7.67948	8.04439	7.2384	7.47573	7.47573	8.04985	8.19967	8.57365	8.633	8.84549	9.05799	9.07682
210_m4	14.7	27.7	35.5	39.3	43.8	46.9	48.2	51	53.9	56	57.8	60.5	62.7	65.2	68	69.6	71.1	73.6	204	221	215	202	242	203	221	235	488	386	405	581	505	449	532	490	502	563	7.67243	7.7879	7.74819	7.65821	7.91886	7.66534	7.7879	7.87652	8.93074	8.59246	8.66178	9.18239	8.98014
211_m5	14.7	27.5	37	41.5	46.6	50	52.5	54.6	57	59	59.4	55.8	54.1	55.4	51.8	48.6	49.8	53.4	193	264	274	235	519	530	600	586	600	600	600	600	584	600	478	600	600	598	7.59246	8.04439	8.09803	7.87652	9.01959	9.04985	9.22882	9.19476	9.22882	9.22882	9.22882	9.22882	9.18982
217_m1	11.4	23	31.5	36.8	43.1	45.7	48.9	52.3	57.2	60.5	62.2	62.1	60.8	61.7	57.7	51.7			116	188	235	178	357	189	231	305	461	554	600	579	600	600	545	539			6.85798	7.55459	7.87652	7.47573	8.47978	7.56224	7.85175	8.25267	8.84862	9.11374	9.22882	9.17742	9.22882
218_m2	15.7	26.3	34.6	41	47.6	51.2	55.9	59.9	64.5	69.5	73.3	77.7	81.1	85.9	90.1	91.3	91.2	93.9	171	237	279	182	185	256	336	324	414	483	461	356	378	526	268	316	348	286	7.41785	7.88874	8.12412	7.50779	7.53138	8	8.39232	8.33985	8.69349	8.91588	8.84862	8.47573	8.56224
219_m3	12.7	25.2	35.3	42.4	48.5	53.1	55.6	60.1	65.8	69.8	73.3	74.8	67.5	60.5	56				136	195	284	196	177	284	185	232	440	415	407	434	494	600	600				7.08746	7.60733	8.14975	7.61471	7.46761	8.14975	7.53138	7.85798	8.78136	8.69697	8.66888	8.76155	8.94837
220_m4	12.4	24.1	31.6	36.7	42.5	45.5	48.2	51.2	54.3	57.2	59.8	61.7	63.7	65.7	68.6	69.1	70	72.3	130	244	208	191	215	213	234	213	257	219	290	244	226	229	296	251	292	340	7.02237	7.93074	7.70044	7.57743	7.74819	7.73471	7.87036	7.73471	8.00562	7.77479	8.17991	7.93074	7.82018
221_m5	11.8	22.5	30.2	36.2	41.7	45.3	48.7	51.8	55.1	57.2	59.3	61.3	63.3	64.7	67.4	69.1	70.8	73.8	121	216	226	152	178	189	205	220	223	170	225	256	179	227	260	238	230	250	6.91886	7.75489	7.82018	7.24793	7.47573	7.56224	7.67948	7.78136	7.8009	7.40939	7.81378	8	7.48382
232_m1	14.6	23.7	36.1	39.3	45	47.8	49.7	54.7	59.7	62	65.7	69.3	73.3	75.3	79.7	80.1	83.7	87.7	157	215	197	233	197	216	205	230	218	271	384	276	256	265	357	239	374	254	7.29462	7.74819	7.62205	7.86419	7.62205	7.75489	7.67948	7.84549	7.76818	8.08215	8.58496	8.10852	8
233_m2	14.3	22.4	33	34.9	42.4	46.1	48.3	52.3	57.4	61.5	64.8	66.8	70.3	69.9	72.7	75.2	79.9	78.5	167	165	240	206	255	256	229	222	315	255	473	507	380	225	457	456	334	459	7.3837	7.36632	7.90689	7.6865	7.99435	8	7.8392	7.79442	8.29921	7.99435	8.8857	8.98584	8.56986
234_m3	15	24.2	34	37	42	47.1	47.8	51.1	54.7	56.8	60.2	62.6	64.4	66.2	69.4	68.9	71.6	73	169	213	193	214	217	198	195	210	275	284	250	254	210	354	383	254	257	192	7.40088	7.73471	7.59246	7.74147	7.76155	7.62936	7.60733	7.71425	8.10329	8.14975	7.96578	7.98868	7.71425
235_m4	12.5	20.7	32.3	34.9	41.2	44.9	46.7	51.1	54.6	58.1	60.6	63	65.3	67.3	70.9	72.5	74.1	76.1	129	177	194	191	168	186	201	178	198	187	280	379	268	277	278	253	371	263	7.01123	7.46761	7.59991	7.57743	7.39232	7.53916	7.65105	7.47573	7.62936	7.54689	8.12928	8.56605	8.06609
236_m5	14.5	23.9	35.1	38.2	45	48.5	49.8	54.1	59.4	61.7	64.6	67.1	70	72.1	75.5	76.9	79.2	81.8	200	202	259	235	238	236	176	200	360	296	411	324	322	257	304	244	281	220	7.64386	7.65821	8.01681	7.87652	7.89482	7.88264	7.45943	7.64386	8.49185	8.20945	8.68299	8.33985	8.33092
237_m6	13.8	22.9	33.2	36.1	40.2	42.9	44.4	48.7	51.9	54.3	56.1	59.3	62	62.9	65.5	67.6	69.6	71.8	171	211	160	254	176	226	163	305	407	508	593	569	586	521	559	600	444	459	7.41785	7.7211	7.32193	7.98868	7.45943	7.82018	7.34873	8.25267	8.66888	8.98868	9.21189	9.15228	9.19476
244_m1	14.5	24.6	38.5	41.6	48.5	52.1	54.6	58.9	62.5	64.4	65.8	66.3	65.6	64	65.2	64.1	62.7	63.1	155	233	244	192	335	318	350	393	419	561	553	600	490	600	541	555	562	600	7.27612	7.86419	7.93074	7.58496	8.38802	8.31288	8.45121	8.61839	8.71081	9.13186	9.11114	9.22882	8.93664
245_m2	13	21.6	31.1	33.4	40	43.2	45	49.1	51.6	54.6	56.7	58.3	60.4	61.3	63.3	64.8	67.2	68.8	173	239	226	244	169	225	179	237	240	375	474	297	267	276	223	265	329	354	7.43463	7.90087	7.82018	7.93074	7.40088	7.81378	7.48382	7.88874	7.90689	8.55075	8.88874	8.21432	8.0607
246_m3	15.2	25.5	36.3	39	44	47.1	49.3	52.8	56.9	59.6	59.8	61.1	63.2	63.3	64.7	63.5	64.1	64	168	228	257	281	216	323	277	368	586	467	544	590	593	600	557	600	541	593	7.39232	7.83289	8.00562	8.13443	7.75489	8.33539	8.11374	8.52356	9.19476	8.86728	9.08746	9.20457	9.21189
247_m4	11.8	19.6	29.8	33.3	39.6	43.4	46	49.8	53	55.8	57.6	59.4	60	60.2	61.4	61.3	61.9	63.3	138	271	225	141	178	196	174	315	388	491	556	600	600	600	600	562	600	600	7.10852	8.08215	7.81378	7.13955	7.47573	7.61471	7.44294	8.29921	8.59991	8.93958	9.11894	9.22882	9.22882
248_m5	12.5	21.3	32.5	36.1	41.9	46.1	48.9	53.2	56.8	59.8	62.7	64.7	67.1	68.8	70.6	71.2	73.5	75.5	144	216	202	304	172	191	221	309	313	282	296	261	247	280	258	208	247	370	7.16993	7.75489	7.65821	8.24793	7.42626	7.57743	7.7879	8.27146	8.29002	8.13955	8.20945	8.02791	7.94837
249_m6	12.5	21.4	33	35.9	43.4	45.8	48	50.8	55.3	59	60	62.2	65.4	67.1	69.6	71.7	75	77.1	129	259	233	374	178	201	191	250	269	310	310	298	305	501	306	326	409	379	7.01123	8.01681	7.86419	8.54689	7.47573	7.65105	7.57743	7.96578	8.07146	8.27612	8.27612	8.21917	8.25267
256_m1	9.4	17	28.6	31.3	37.3	41.3	43.7	47.1	50.4	53.7	55.5	56.8	58.2	57.7	58.5	58	59	59.9	128	182	200	241	246	195	208	216	268	391	449	412	444	489	541	525	550	539	7	7.50779	7.64386	7.91289	7.94251	7.60733	7.70044	7.75489	8.06609	8.61102	8.81057	8.6865	8.79442
257_m2	10.5	18.7	30.4	33.9	40.2	44	45.7	48.8	53.1	57.5	60.2	62.9	65.7	65.8	67	61.6	58.3	53.5	145	248	268	238	238	221	179	310	189	429	483	472	565	562	600	600	600	600	7.17991	7.9542	8.06609	7.89482	7.89482	7.7879	7.48382	8.27612	7.56224	8.74483	8.91588	8.88264	9.14211
258_m3	12.3	21.5	34.4	38.6	45	49.9	50.1	53.2	57	59.6	59.1	54.4	53.9	53.5					122	221	226	158	345	519	561	600	557	566	600	598	600	600					6.93074	7.7879	7.82018	7.30378	8.43045	9.01959	9.13186	9.22882	9.12153	9.14466	9.22882	9.224	9.22882
259_m4	10.7	18.2	29.8	32.8	38.2	42.2	44.1	46.9	50.6	54	55.1	56.8	56.9	55.6	54.5	54.2	55.3	55.8	126	197	229	218	165	204	157	181	346	458	504	577	600	569	600	600	600	600	6.97728	7.62205	7.8392	7.76818	7.36632	7.67243	7.29462	7.49985	8.43463	8.8392	8.97728	9.17243	9.22882
260_m5	8.6	16.3	27.7	31.2	36.8	40.3	41.8	44.2	47.6	50.9	52.3	54.9	56.3	56.8	58.6	59.5	62.4	65	134	176	208	204	189	206	182	175	152	259	161	179	157	144	144	151	140	141	7.06609	7.45943	7.70044	7.67243	7.56224	7.6865	7.50779	7.45121	7.24793	8.01681	7.33092	7.48382	7.29462
261_m6	9.2	17	29.1	32.8	40.9	45.3	47.4	50.9	57.1	61	64.5	67.1	68.9	70.3	73.4	74.8	77.1	80.3	153	267	225	271	268	200	203	281	444	506	418	338	257	350	382	358	298	374	7.25739	8.0607	7.81378	8.08215	8.06609	7.64386	7.66534	8.13443	8.79442	8.98299	8.70736	8.40088	8.00562
267_m1	16.6	29.6	34.5	37.1	39.5	42.9	46	47.6	49.7	51.1	52.1	53	55.2	57.9	58.5	59.7	67.6	65.2	186	224	242	204	198	222	171	238	162	215	132	184	160	156	131	219	325	169	7.53916	7.80735	7.91886	7.67243	7.62936	7.79442	7.41785	7.89482	7.33985	7.74819	7.04439	7.52356	7.32193
268_m2	17.4	29.9	36	39.3	42.1	45.9	48.9	50.8	53.1	53.2	53.6	54.5	54.8	55.4	55.7	66.5	56	56.3	232	220	193	225	226	365	438	462	540	600	600	600	600	600	557	598	600	600	7.85798	7.78136	7.59246	7.81378	7.82018	8.51175	8.77479	8.85175	9.07682	9.22882	9.22882	9.22882	9.22882
269_m3	15.2	26.2	32.5	38.3	41.6	45.4	47.4	47.8	46.5	46.7	46.2	45.9	44.2	43.8	43.4	43.6	44.9	45.7	229	254	174	261	319	454	600	600	537	596	533	568	600	494	481	533	450	565	7.8392	7.98868	7.44294	8.02791	8.31741	8.82655	9.22882	9.22882	9.06878	9.21917	9.05799	9.14975	9.22882
270_m4	17.5	29.4	35.1	36.5	40.5	45	47.2	48.6	52.1	53.7	57.3	58.1	59.6	64.4	64.7	65.8	69.4	72.6	228	207	196	192	206	177	200	238	270	215	276	228	200	348	353	249	446	262	7.83289	7.69349	7.61471	7.58496	7.6865	7.46761	7.64386	7.89482	8.07682	7.74819	8.10852	7.83289	7.64386
271_m5	17.4	29.4	34.7	36.9	39.5	43.5	45.8	46.9	48.3	48.9	50.8	51.3	52.8	55.1	55.5	56.2	58.9	59	190	281	194	260	381	230	229	336	271	242	254	221	196	296	242	319	362	214	7.56986	8.13443	7.59991	8.02237	8.57365	7.84549	7.8392	8.39232	8.08215	7.91886	7.98868	7.7879	7.61471
272_m6	16.9	28.2	32.4	33.9	38.7	44	46.3	48.7	51	54.3	57	58	59.2	61.1	62.4	63.7	65.5	66.2	155	203	158	192	165	192	201	257	456	527	510	477	600	585	599	600	574	584	7.27612	7.66534	7.30378	7.58496	7.36632	7.58496	7.65105	8.00562	8.83289	9.04166	8.99435	8.89785	9.22882
277_m1	16.7	26.9	33.5	36.1	38.8	42.5	44.8	47.3	50.5	53.6	56.8	58.5	59.7	61.1	61.4	61.1	63.3	65	219	294	203	254	366	214	252	433	589	545	600	599	600	600	556	583	545	589	7.77479	8.19967	7.66534	7.98868	8.5157	7.74147	7.97728	8.75822	9.20212	9.09011	9.22882	9.22641	9.22882
278_m2	15.6	26.5	34.1	36.7	40	43.2	45.8	48	50.4	52.5	55.7	58.8	59.9	61.2	60.7	60.3	58.1	63.3	243	314	252	307	357	189	256	367	468	523	512	506	384	417	357	352	251	326	7.92481	8.29462	7.97728	8.26209	8.47978	7.56224	8	8.51964	8.87036	9.03067	9	8.98299	8.58496
279_m3	16	25.6	33.4	37.3	40.7	44.7	46.1	48.7	50.3	53.6	56.9	59.4	61.3	63.6	64.5	65.1	68.4	72.1	219	252	237	252	349	380	201	261	199	405	406	357	504	435	437	453	414	384	7.77479	7.97728	7.88874	7.97728	8.44708	8.56986	7.65105	8.02791	7.63662	8.66178	8.66534	8.47978	8.97728
280_m4	12.8	24.6	36.8	41.9	46.2	49.6	52.9	55.4	58.1	61.7	64.5	66	69.6	73	73.5	75.7	79.9	83.6	155	200	291	214	375	396	463	550	569	589	529	427	467	480	370	467	465	428	7.27612	7.64386	8.18488	7.74147	8.55075	8.62936	8.85487	9.10329	9.15228	9.20212	9.04712	8.73809	8.86728
281_m5	12.6	25.4	37.5	41.7	45.9	48.8	50.1	53	56.6	58.2	54.1	45.2							193	204	266	422	578	594	478	600	530	528	518	481							7.59246	7.67243	8.05528	8.7211	9.17493	9.21432	8.90087	9.22882	9.04985	9.04439	9.01681	8.90989
286_m1	9.8	17.4	23.5	27.4	30.1	33	56.8	39	40.7	44.3	48.4	50.6	54	57.6	58.6	59.4	61.4	61.2	185	233	252	275	318	217	176	451	236	174	160	142	175	316	233	186	261	234	7.53138	7.86419	7.97728	8.10329	8.31288	7.76155	7.45943	8.81698	7.88264	7.44294	7.32193	7.14975	7.45121
287_m2	13.6	23.7	32.8	37.6	41.2	43	45.4	47.6	50	51.3	52.8	53.1	54.7	55.3	54.8	51.3	45.2		173	247	276	222	361	317	505	589	600	600	600	600	600	600	600	600	600		7.43463	7.94837	8.10852	7.79442	8.49586	8.30834	8.98014	9.20212	9.22882	9.22882	9.22882	9.22882	9.22882
288_m3	12.1	24.6	35	38.9	43.3	46.5	48	50.6	52.8	55.7	58.2	56	53.3	46.7	43.4				175	247	220	297	446	363	370	450	510	456	427	411	536	548	565				7.45121	7.94837	7.78136	8.21432	8.8009	8.50383	8.53138	8.81378	8.99435	8.83289	8.73809	8.68299	9.06609
289_m4	11.1	20	27.8	32	36.2	41	41.4	44.1	48.7	52.8	56.3	58.5	60.4	61.9	63.8	64.9	66	64	162	252	239	223	236	194	147	259	245	363	538	539	504	524	505	568	579	600	7.33985	7.97728	7.90087	7.8009	7.88264	7.59991	7.19967	8.01681	7.93664	8.50383	9.07146	9.07414	8.97728
294_m1	20.5	33	35.7	40.3	38.2	38.7	41	55.6	46.3	49.1	53.5	54.7	57.3	56.9	61.5	67.7	70.9	73.9	182	199	193	159	150	145	204	259	168	144	181	142	159	151	234	278	258	300	7.50779	7.63662	7.59246	7.31288	7.22882	7.17991	7.67243	8.01681	7.39232	7.16993	7.49985	7.14975	7.31288
295_m2	19.4	33.6	38	42.4	46	48.7	51.3	44.6	58.8	63.4	64.5	65.2	56.3	63.5	65.1	72.4	71.7	78.6	211	168	232	148	170	185	214	238	367	348	388	352	152	120	174	183	130	173	7.7211	7.39232	7.85798	7.20945	7.40939	7.53138	7.74147	7.89482	8.51964	8.44294	8.59991	8.45943	7.24793
296_m3	18.2	32.5	37.5	41.2	44.4	45.1	46.6	50.3	52.3	56.6	58.8	60.4	63.8						229	159	272	129	150	157	254	539	162	324	481	474	382						7.8392	7.31288	8.08746	7.01123	7.22882	7.29462	7.98868	9.07414	7.33985	8.33985	8.90989	8.88874	8.57743
297_m4	17.5	32.3	37.4	42.6	45.1	45.6	49.2	53.1	53.6	54.8	54.5	54.3	53.4	51.3	49	47.8			221	194	221	263	216	280	335	424	331	464	493	441	402	359	432	520			7.7879	7.59991	7.7879	8.03892	7.75489	8.12928	8.38802	8.72792	8.37069	8.85798	8.94544	8.78463	8.65105
298_m5	16.4	30.6	36.5	42.1	43.9	44.1	42.8	43.5	43.3	44	44.2	46.1	45.4	40.5					222	169	208	452	586	560	600	600	570	600	561	506	524	378					7.79442	7.40088	7.70044	8.82018	9.19476	9.12928	9.22882	9.22882	9.15482	9.22882	9.13186	8.98299	9.03342
299_m6	14	27.2	32.6	39.4	43.4	45.9	48.1	51.2	54.4	57.1	59.1	58.7	61.6	62.3	63.2	65.4	67.1	70.6	179	198	218	220	178	232	234	235	260	364	368	401	388	229	193	403	332	287	7.48382	7.62936	7.76818	7.78136	7.47573	7.85798	7.87036	7.87652	8.02237	8.50779	8.52356	8.64746	8.59991
304_m1	14.8	28	31.6	35.9	39.9	43.5	47.2	48.7	50	51.4	53.4	54.8	56.9	57.5	59.6	61.6	64.3	63.8	251	219	264	205	202	199	259	267	222	159	220	223	223	226	236	184	260	170	7.97154	7.77479	8.04439	7.67948	7.65821	7.63662	8.01681	8.0607	7.79442	7.31288	7.78136	7.8009	7.8009
305_m2	13.3	26.3	33.6	41	42.2	51.7	55.2	57.2	56.4	43									159	177	189	268	526	514	600	600	600	600									7.31288	7.46761	7.56224	8.06609	9.03892	9.00562	9.22882	9.22882	9.22882	9.22882
306_m3	18.1	30	34.9	40	45.2	48.6	50.5	53.6	55.7	57.3	60.1	62.2	61.7	60.2	64.8	69.7	69.7	71.4	189	181	244	189	182	163	295	209	187	175	268	249	135	144	224	190	130	188	7.56224	7.49985	7.93074	7.56224	7.50779	7.34873	8.20457	7.70736	7.54689	7.45121	8.06609	7.96	7.07682
307_m4	17.9	33.1	36.4	41.5	46.4	49.9	50.7	53.3	50.6										209	187	226	262	421	504	563	600	596										7.70736	7.54689	7.82018	8.03342	8.71768	8.97728	9.13699	9.22882	9.21917
308_m5	16.8	29.7	32.9	35.4	39.5	42.6	46.8	49.6	51.5	54.2	56	57.6	57.5	58.3	58.4	60.8	62.7	64	230	235	223	195	189	165	282	318	329	306	413	442	327	220	294	308	179	161	7.84549	7.87652	7.8009	7.60733	7.56224	7.36632	8.13955	8.31288	8.36194	8.25739	8.69	8.7879	8.35315
309_m6	18	30.2	34.2	37.8	43.7	47	49.7	53.6	54.4	57.6	59.3	61.4	64.4	66.2	68.9	68.5	70.9	75.6	189	178	168	179	145	156	151	217	189	293	294	264	397	338	406	264	342	242	7.56224	7.47573	7.39232	7.48382	7.17991	7.2854	7.2384	7.76155	7.56224	8.19476	8.19967	8.04439	8.633
315_m1	15	29.5	33.9	39.9	44.9	46.4	47.3	49.5	51.5	54.8	56.6	58.4	61.3	62.7	65.3	67.1	69.1	71	155	167	233	169	259	172	174	199	222	343	372	378	435	391	450	466	361	360	7.27612	7.3837	7.86419	7.40088	8.01681	7.42626	7.44294	7.63662	7.79442	8.42206	8.53916	8.56224	8.76487
316_m2	13.3	27	33.4	40.2	45.8	48.2	49	50.7	43.9										155	182	234	429	575	565	535	600	600										7.27612	7.50779	7.87036	8.74483	9.16742	9.14211	9.0634	9.22882	9.22882
317_m3	12.3	25.5	32.5	36.3	45.9	48.7	50.4	50.6											206	171	201	218	536	553	593	589											7.6865	7.41785	7.65105	7.76818	9.06609	9.11114	9.21189	9.20212
318_m4	13.8	27	32.2	39.7	44.2	45.4	46.1	48.7	49.4	43.2									141	191	280	303	501	429	592	600	571	519									7.13955	7.57743	8.12928	8.24317	8.96867	8.74483	9.20945	9.22882	9.15735	9.01959
320_m6	13.1	26.3	30.7	36.4	41.9	44.8	46.4	49.7	52	54.1	57	57.4	60.3	61.4	64	66.4	68.4	71.2	160	171	263	224	185	285	203	200	342	297	396	387	437	397	427	457	337	278	7.32193	7.41785	8.03892	7.80735	7.53138	8.15482	7.66534	7.64386	8.41785	8.21432	8.62936	8.59619	8.77149
326_m1	17.7	28.8	35.2	41	43.7	46.5	46	49.7	53.3	56.2	55.4								221	222	178	123	215	312	143	457	489	501	369								7.7879	7.79442	7.47573	6.94251	7.74819	8.2854	7.15987	8.83605	8.93369	8.96867	8.52748
327_m2	19.3	30.3	37.1	42.9	45.4	47.4	47	47.3	47	45	38.4								162	333	327	283	447	597	600	600	600	600	550								7.33985	8.37938	8.35315	8.14466	8.80413	9.22159	9.22882	9.22882	9.22882	9.22882	9.10329
328_m3	18.9	29	34.6	41	44.7	47.7	49.5	52.4	52.6	50.8	46.9	43.2	42.5	41.4	35.1				206	273	313	202	402	439	348	434	573	600	515	600	600	600	318				7.6865	8.09276	8.29002	7.65821	8.65105	8.77808	8.44294	8.76155	9.16239	9.22882	9.00843	9.22882	9.22882
329_m4	17.4	26.7	30.6	32.9	35.2	37.2	38.4	40.2	42	42.9	44.9	47.3	48.8	50.8	55.5	57.7	60.4	62	218	206	217	201	178	180	136	164	198	134	148	160	142	233	261	236	313	413	7.76818	7.6865	7.76155	7.65105	7.47573	7.49185	7.08746	7.35755	7.62936	7.06609	7.20945	7.32193	7.14975
335_m1	19.3	30.1	36.4	40	46.5	48.5	50.8	55.9	57.9	55.4	54.4	55.6	52.5	49.5	41.1				192	244	217	146	270	404	166	480	394	470	600	589	525	501	400				7.58496	7.93074	7.76155	7.18982	8.07682	8.65821	7.37504	8.90689	8.62205	8.87652	9.22882	9.20212	9.03617
336_m2	17	27.9	33.5	38.4	41.3	43.2	43.6	47.6	51.3	54.3	57.7	61.5	60.2	58.2	55.6	55.6	49.5	44.5	160	188	227	186	155	149	177	211	224	392	510	535	555	569	308	600	600	600	7.32193	7.55459	7.82655	7.53916	7.27612	7.21917	7.46761	7.7211	7.80735	8.61471	8.99435	9.0634	9.11634
337_m3	18.3	30.1	37	42.2	45.1	46.9	47.2	47.8	45	44	42.2								174	180	293	270	408	568	589	600	600	600	596								7.44294	7.49185	8.19476	8.07682	8.67243	9.14975	9.20212	9.22882	9.22882	9.22882	9.21917
338_m4	16.3	25.5	31.5	36.4	41.6	42.7	46.2	50.8	54.1	57.8	60.1	63.9	65.1	66.6	70	74.2	77.8	77.2	201	218	296	208	221	217	150	250	155	437	576	526	445	552	530	393	363	199	7.65105	7.76818	8.20945	7.70044	7.7879	7.76155	7.22882	7.96578	7.27612	8.77149	9.16993	9.03892	8.79766
345_m1	13	23.2	32.3	37.9	41.9	44.9	43.1	46.5	51.1	54.9	53	57.5	58.9	59.4	63.8	63.2	63.9	64.4	178	243	218	184	229	457	102	311	291	363	175	311	247	247	420	263	285	371	7.47573	7.92481	7.76818	7.52356	7.8392	8.83605	6.67243	8.28077	8.18488	8.50383	7.45121	8.28077	7.94837
346_m2	13.5	23.3	32.6	40.3	46.2	49.5	47.9	50	55	57.3	59.3	53.9	45.8						140	206	309	257	429	477	130	406	492	547	600	600	432						7.12928	7.6865	8.27146	8.00562	8.74483	8.89785	7.02237	8.66534	8.94251	9.0954	9.22882	9.22882	8.75489
347_m3	13.4	21.7	29.7	36.5	40.5	43.4	45.1	48.6	52	53.6	49.9	53.5	52.1	50.8	49.2				176	206	197	260	309	490	392	593	476	427	376	489	525	535	600				7.45943	7.6865	7.62205	8.02237	8.27146	8.93664	8.61471	9.21189	8.89482	8.73809	8.55459	8.93369	9.03617
354_m1	18.7	29.7	37.9	41.4	45.3	49.2	51.1	55.2	60.5	62.1	66.5	69.6	72.9	75.4	80.2	75	72.4	68.5	176	193	200	164	275	262	288	361	546	284	263	310	360	465	326	253	323	151	7.45943	7.59246	7.64386	7.35755	8.10329	8.03342	8.16993	8.49586	9.09276	8.14975	8.03892	8.27612	8.49185
355_m2	17.9	29.2	37.7	42	47.2	51.4	52.8	56.3	60.5	62.3	65.8	67	68.8	71	67.8	70.3	70.4	69.2	179	196	227	209	265	255	356	321	395	375	374	371	345	332	353	308	516	443	7.48382	7.61471	7.82655	7.70736	8.04985	7.99435	8.47573	8.32643	8.62571	8.55075	8.54689	8.53528	8.43045
356_m3	16.2	24.7	29.9	33.7	38.8	42.4	43.9	47.2	50.5	51.6	54.6	56.4	57.5	59	61.5	63.6	65.3	67.2	152	229	230	224	313	216	188	243	405	322	430	400	332	335	281	310	388	280	7.24793	7.8392	7.84549	7.80735	8.29002	7.75489	7.55459	7.92481	8.66178	8.33092	8.74819	8.64386	8.37504
357_m4	16.3	26.9	35.2	39.7	44.2	47.9	48.9	52.2	55.2	56.6	59.3	62.1	65.4	67.6	69.9	73.1	75.5	76.4	151	222	194	206	152	173	177	192	164	158	175	234	206	265	185	205	300	285	7.2384	7.79442	7.59991	7.6865	7.24793	7.43463	7.46761	7.58496	7.35755	7.30378	7.45121	7.87036	7.6865
358_m5	15.5	25.5	34.7	39.1	44.9	47.2	49	51.8	54.5	56.4	60.6	61.5	63.6	66	68.5	69.7	71.9	74.1	171	175	294	212	310	198	256	246	340	297	332	263	253	366	352	337	411	293	7.41785	7.45121	8.19967	7.72792	8.27612	7.62936	8	7.94251	8.40939	8.21432	8.37504	8.03892	7.98299
365_m1	17.2	25.9	34	37.6	41.2	44.6	47.8	49.7	51.8	53.1	55.3	56.8	60	62.1	63.4	66.3	68.6	71.1	156	259	226	190	197	137	183	203	143	176	192	199	214	212	215	205	179	205	7.2854	8.01681	7.82018	7.56986	7.62205	7.09803	7.5157	7.66534	7.15987	7.45943	7.58496	7.63662	7.74147
366_m2	15.9	25.1	34.3	38.5	44	47.8	50.3	52.8	55	58.1	61	63.5	66.5	69.2	70.2	70.8	72.2	74.3	177	217	244	204	214	173	167	253	265	349	368	464	456	472	536	482	514	459	7.46761	7.76155	7.93074	7.67243	7.74147	7.43463	7.3837	7.98299	8.04985	8.44708	8.52356	8.85798	8.83289
367_m3	16.6	25.6	34.9	39.4	43.2	48.2	50.8	54.8	57.2	58.5	61	62.8	62.3	62.2	64.1	68.4	70.7	73.5	174	271	316	174	171	315	265	229	235	245	210	199	160	212	203	177	165	157	7.44294	8.08215	8.30378	7.44294	7.41785	8.29921	8.04985	7.8392	7.87652	7.93664	7.71425	7.63662	7.32193
368_m4	15.4	23.8	32.7	37.6	43.4	48.7	51.7	54.8	57.3	59	61.8	65	67.4	70.5	72.5	75	78.1	82.1	136	232	294	172	204	188	180	222	137	181	221	204	162	265	254	319	258	296	7.08746	7.85798	8.19967	7.42626	7.67243	7.55459	7.49185	7.79442	7.09803	7.49985	7.7879	7.67243	7.33985
369_m5	16.1	27.3	38.6	43.1	45.6	45.8	47.1	48	46.5	46.4	46.7	47.7	47.9	48.2	48.3	47.8	47.4	48.9	159	160	308	521	600	492	600	600	550	600	600	600	600	600	600	600	524	600	7.31288	7.32193	8.26679	9.02514	9.22882	8.94251	9.22882	9.22882	9.10329	9.22882	9.22882	9.22882	9.22882
375_m1	14.9	25.2	34.3	39.6	44	47.6	48.7	52	54.3	56.5	60.2	61.6	64.7	67	70	69.8	71.3	72.6	149	238	211	182	229	276	202	270	267	310	270	285	282	342	367	286	367	234	7.21917	7.89482	7.7211	7.50779	7.8392	8.10852	7.65821	8.07682	8.0607	8.27612	8.07682	8.15482	8.13955
376_m2	14.2	23.7	33.4	38.4	43.7	46.8	49.6	52.5	56	57	62.1	63.4	65	67.2	67	65.7	65.4	71	169	249	286	268	342	356	265	289	261	244	398	460	292	266	240	136	231	195	7.40088	7.96	8.15987	8.06609	8.41785	8.47573	8.04985	8.17493	8.02791	7.93074	8.63662	8.84549	8.18982
377_m3	15.3	25.7	33.8	37.6	43.3	47.3	49.6	54.1	57	57.9	62.1	63.3	66.9	68.9	70.8	71.9	75.1	76.5	175	260	247	160	198	162	184	215	148	151	161	229	174	198	238	183	216	163	7.45121	8.02237	7.94837	7.32193	7.62936	7.33985	7.52356	7.74819	7.20945	7.2384	7.33092	7.8392	7.44294
378_m4	14	23.7	32.2	36.8	41.8	43.8	43.5	44.7	45.3	45.1	45.9	45.8	46.4	46.7	46.7	46.5	45.9	45.7	187	244	203	237	506	481	505	594	600	600	563	571	570	550	549	526	417	481	7.54689	7.93074	7.66534	7.88874	8.98299	8.90989	8.98014	9.21432	9.22882	9.22882	9.13699	9.15735	9.15482
386_m1	13	21.8	29.8	32.2	36.5	38.7	39.7	40.1	39.7	41.7	44.5	45.9	46.6	47.5	48.5	48.8	48.5	47.8	134	183	175	177	156	126	128	127	111	140	122	142	124	130	106	95	104	115	7.06609	7.5157	7.45121	7.46761	7.2854	6.97728	7	6.98868	6.79442	7.12928	6.93074	7.14975	6.9542
387_m2	13	24.4	31	31.9	32.4	34.4	37	41.4	40.5	42.4	47.4	49.3	51.4	54.1	56.5	59.4	59.8	66.6	143	240	191	155	130	140	165	178	142	190	152	199	155	229	210	298	271	262	7.15987	7.90689	7.57743	7.27612	7.02237	7.12928	7.36632	7.47573	7.14975	7.56986	7.24793	7.63662	7.27612
388_m3	10.7	18.7	27	29.7	33.8	36.9	37.1	39.5	39.4	40.5	43	43.6	43.9	45.7	47	47.6	48.8	49	134	267	285	186	186	155	173	257	120	147	143	169	118	149	248	163	158	120	7.06609	8.0607	8.15482	7.53916	7.53916	7.27612	7.43463	8.00562	6.90689	7.19967	7.15987	7.40088	6.88264
389_m4	12.2	22.1	32.1	34.9	38.9	42.4	43.2	45.1	44.3	46.3	50.5	51.4	51.9	54.1	55.6	57.7	59.7	61.3	170	284	285	212	291	304	312	296	228	328	447	313	414	404	279	302	322	324	7.40939	8.14975	8.15482	7.72792	8.18488	8.24793	8.2854	8.20945	7.83289	8.35755	8.80413	8.29002	8.69349
390_m5	12.8	22.7	27.3	28.5	30.7	34.3	42.5	48.3	51.8	54.6	59	61	63.6	64.5	67.3	69.4	72	74.4	132	249	205	149	169	155	198	250	164	216	183	204	187	247	256	239	289	264	7.04439	7.96	7.67948	7.21917	7.40088	7.27612	7.62936	7.96578	7.35755	7.75489	7.5157	7.67243	7.54689
391_m6	12.6	24	33.4	36.7	42.2	45.2	47.7	51.1	54.5	55.9	59.7	60.7	63	65.3	67	70.2	72.9	75	155	222	256	151	144	194	165	201	169	179	190	190	207	179	195	313	324	212	7.27612	7.79442	8	7.2384	7.16993	7.59991	7.36632	7.65105	7.40088	7.48382	7.56986	7.56986	7.69349
392_m7	13.5	22	30.9	34.7	40.3	44.8	44.5	48.3	51	52.4	55.8	57.3	57.6	60	60.7	63	64.5	66.6	152	216	262	241	162	178	178	225	178	194	194	177	142	332	196	170	243	218	7.24793	7.75489	8.03342	7.91289	7.33985	7.47573	7.47573	7.81378	7.47573	7.59991	7.59991	7.46761	7.14975
393_m8	12.7	23.1	33.8	37.5	42	46.1	46.8	48.5	51.4	52.8	56.1	56.3	57.6	57.8	58.9	59.3	59.5	60.8	148	196	240	207	182	278	161	360	458	450	467	489	449	505	596	542	526	507	7.20945	7.61471	7.90689	7.69349	7.50779	8.11894	7.33092	8.49185	8.8392	8.81378	8.86728	8.93369	8.81057
405_m1	14.8	23.5	32.5	37	43.2	48.2	49.9	53.2	58.6	60.7	64.3	66.6	68.1	70.7	71.7	74.2	75.6	72.6	167	206	224	190	194	191	166	199	150	211	184	212	199	221	201	156	163	111	7.3837	7.6865	7.80735	7.56986	7.59991	7.57743	7.37504	7.63662	7.22882	7.7211	7.52356	7.72792	7.63662
406_m2	14.3	21.1	30.8	33.1	36.8	40.5	41.1	44.2	47.3	49.9	53.4	54.8	56.1	57.8	59.8	62.7	64.8	65.9	173	186	279	189	173	198	185	198	157	196	129	269	169	162	173	154	148	153	7.43463	7.53916	8.12412	7.56224	7.43463	7.62936	7.53138	7.62936	7.29462	7.61471	7.01123	8.07146	7.40088
407_m3	13.3	19.2	31.2	36.5	43.6	47.4	49.1	52.6	57.3	58.7	57.3	56.3	49.1	45	41.6	36.1			169	214	196	181	269	314	271	401	421	433	506	464	481	543	572	600			7.40088	7.74147	7.61471	7.49985	8.07146	8.29462	8.08215	8.64746	8.71768	8.75822	8.98299	8.85798	8.90989
408_m4	12.7	19.5	30	34.5	40	43.4	44.5	47.9	52.3	55.1	58.7	59.3	58.8	58.9	62.7	63.7	69	73.2	139	201	235	202	204	243	174	183	295	274	332	537	173	245	270	141	222	243	7.11894	7.65105	7.87652	7.65821	7.67243	7.92481	7.44294	7.5157	8.20457	8.09803	8.37504	9.06878	7.43463
409_m5	13.5	21.2	32.5	37.6	44.5	49.3	50.3	54.8	59.3	61.3	63.9	67.1	70.8	74.1	77.1	79.8	81.3	83.4	137	217	294	205	232	245	226	251	284	308	339	393	355	392	380	317	296	225	7.09803	7.76155	8.19967	7.67948	7.85798	7.93664	7.82018	7.97154	8.14975	8.26679	8.40514	8.61839	8.47168
415_m1	14.9	26.4	36	40.2	45.6	49.5	51.8	53.4	58	60.6	61.8	63.6	66.5	66.9	67	69.4	71.9	72.4	172	223	208	202	264	338	360	269	350	442	444	424	544	422	443	446	514	456	7.42626	7.8009	7.70044	7.65821	8.04439	8.40088	8.49185	8.07146	8.45121	8.7879	8.79442	8.72792	9.08746
416_m2	12.5	22.9	32.3	36.1	41.5	45.1	46.1	48.3	50.2	52.9	54.5	55.6	60.3	60.6	62.8	65	67.6	69	158	260	208	204	164	212	161	226	150	202	159	157	234	206	218	233	224	227	7.30378	8.02237	7.70044	7.67243	7.35755	7.72792	7.33092	7.82018	7.22882	7.65821	7.31288	7.29462	7.87036
417_m3	11	20.4	38.8	32.9	37.9	41.7	44.7	47.2	49	50.1	50.9	51.4	51.2	52	51.9	53.1	52.8	53.1	133	209	194	174	161	309	340	422	479	523	600	600	600	600	600	558	600	571	7.05528	7.70736	7.59991	7.44294	7.33092	8.27146	8.40939	8.7211	8.90388	9.03067	9.22882	9.22882	9.22882
418_m4	11.7	24.2	34.8	39.8	46.2	50.2	51.4	53.5	52.6	52.1	49.4	44.2							139	245	177	169	478	476	550	600	595	600	600	465							7.11894	7.93664	7.46761	7.40088	8.90087	8.89482	9.10329	9.22882	9.21675	9.22882	9.22882	8.86109
425_m1	12.1	22	31.1	32.2	35.2	38	41.8	44.1	50.5	55.2	58.2	60.6	64	66.1	68.9	70.9	73.7	76.7	138	220	253	150	161	164	171	230	245	143	196	171	170	204	209	225	199	184	7.10852	7.78136	7.98299	7.22882	7.33092	7.35755	7.41785	7.84549	7.93664	7.15987	7.61471	7.41785	7.40939
426_m2	13.9	23.2	31.4	35.1	40.6	44.2	45.9	48	52.5	55.7	57.1	58.7	61.2	61.6	63.5	64.3	64.8	64.8	137	178	252	170	171	228	250	317	375	473	540	519	548	547	528	472	571	472	7.09803	7.47573	7.97728	7.40939	7.41785	7.83289	7.96578	8.30834	8.55075	8.8857	9.07682	9.01959	9.09803
427_m3	12.4	23.5	33.5	37.4	40	44.1	45.4	47.7	53.2	55.8	56.4	57.2	59.8	62.1	65.6	66.4	68.4	70.8	138	200	293	143	170	147	201	200	211	235	249	276	263	379	297	282	289	353	7.10852	7.64386	8.19476	7.15987	7.40939	7.19967	7.65105	7.64386	7.7211	7.87652	7.96	8.10852	8.03892
428_m4	10.7	20.8	29.9	36.7	42.5	46.5	47	48.5	51.8	55.8	57.5	59.4	62.5	64.9	68.2	70.3	74.1	76.7	136	210	247	183	290	327	276	200	194	251	270	251	311	349	348	282	266	323	7.08746	7.71425	7.94837	7.5157	8.17991	8.35315	8.10852	7.64386	7.59991	7.97154	8.07682	7.97154	8.28077
434_m1	10.8	20.5	29.5	34.8	39.9	41.9	43	44.5	47	51	52.4	53	56.1	57.1	59.3	61	61.9	63.9	132	198	310	267	147	193	206	191	223	175	174	204	186	181	282	241	194	176	7.04439	7.62936	8.27612	8.0607	7.19967	7.59246	7.6865	7.57743	7.8009	7.45121	7.44294	7.67243	7.53916
435_m2	8	14.9	23.8	31	38.1	42.3	45.7	47.8	51.8	56.3	58.4	63.6	66.3	69.8	72.2	74.5	77.2	79.7	111	176	225	204	276	196	205	231	340	398	387	600	469	484	553	508	569	524	6.79442	7.45943	7.81378	7.67243	8.10852	7.61471	7.67948	7.85175	8.40939	8.63662	8.59619	9.22882	8.87344
436_m3	12.6	23.5	32.5	37.7	42.3	44.2	46.2	47.6	50.2	53.5	55.7	57.7	60.6	62.5	61.5	64.2	65.9	69.9	131	190	320	226	392	346	444	339	226	306	365	485	312	369	341	390	355	285	7.03342	7.56986	8.32193	7.82018	8.61471	8.43463	8.79442	8.40514	7.82018	8.25739	8.51175	8.92184	8.2854
446_m1	16.1	29.6	35.6	41.3	45.3	49.5	49.8	51.8	56.2	59.4	60.9	64.1	65.7	68.2	70	71.4	72	74.6	166	199	166	204	222	192	167	200	183	224	199	160	150	169	156	155	181	182	7.37504	7.63662	7.37504	7.67243	7.79442	7.58496	7.3837	7.64386	7.5157	7.80735	7.63662	7.32193	7.22882
447_m2	12	24.4	32.4	36.5	40	42.8	44.6	47.3	52.6	55.5	56.5	59.7	61.2	62.9	64.1	65.7	66.8	69.2	220	232	192	173	182	222	154	203	202	256	197	222	150	239	196	207	252	234	7.78136	7.85798	7.58496	7.43463	7.50779	7.79442	7.26679	7.66534	7.65821	8	7.62205	7.79442	7.22882
448_m3	10.8	24.5	31.8	36.2	39.6	43.9	44.8	47.2	51.2	53.7	55	57.7	59.8	61	62.9	65	66.4	67.1	161	197	181	174	187	213	172	217	179	217	184	276	209	226	225	308	239	188	7.33092	7.62205	7.49985	7.44294	7.54689	7.73471	7.42626	7.76155	7.48382	7.76155	7.52356	8.10852	7.70736
449_m4	12.4	26.5	35.1	41.1	45.7	49.8	51.8	54	58	61.9	63.4	66.6	64.1	63.4	61.5	60.8	64.3	66.9	150	194	158	196	368	461	212	352	331	454	307	206	192	125	128	228	178	210	7.22882	7.59991	7.30378	7.61471	8.52356	8.84862	7.72792	8.45943	8.37069	8.82655	8.26209	7.6865	7.58496
450_m5	14	25.5	31.2	34.8	38.8	41.9	44.2	47.1	51.5	54.9	56.2	59.2	61.8	61.9	62.6	64.4	65.8	66.9	142	224	148	160	141	163	252	259	486	445	464	392	348	356	366	358	433	375	7.14975	7.80735	7.20945	7.32193	7.13955	7.34873	7.97728	8.01681	8.92481	8.79766	8.85798	8.61471	8.44294
455_m1	9.9	20	28.3	32.7	36.1	39.9	47.3	44.4	49.6	53.1	55.1	58	59.7	62	64.2	66.4	67.9	69.5	172	240	284	240	250	214	128	269	169	283	307	452	275	321	373	314	269	336	7.42626	7.90689	8.14975	7.90689	7.96578	7.74147	7	8.07146	7.40088	8.14466	8.26209	8.82018	8.10329
456_m2	9.4	19.9	28.7	33.5	38.7	43.2	45.4	47	51.4	52.6	52.8	54.3	54.8	55.1	56	56.7	56.6	55.8	156	216	226	316	162	269	234	344	503	539	544	553	486	591	587	583	541	516	7.2854	7.75489	7.82018	8.30378	7.33985	8.07146	7.87036	8.42626	8.97441	9.07414	9.08746	9.11114	8.92481
457_m3	9	20.4	28.8	34.7	39.4	45.5	47.9	49.5	53.7	55.9	57.2	60	61.7	63.7	62.3	61.8	64.3	65.6	149	222	187	193	186	403	221	315	369	518	538	472	469	469	578	467	339	351	7.21917	7.79442	7.54689	7.59246	7.53916	8.65464	7.7879	8.29921	8.52748	9.01681	9.07146	8.88264	8.87344
458_m4	10.1	24.3	34.4	39.5	42.1	46.7	49.4	50.7	54.6	56.3	59.6	63.2	65.5	66.8	67.6	70.1	70.7	72.8	105	245	239	217	185	181	156	200	179	161	228	305	213	206	204	217	147	156	6.71425	7.93664	7.90087	7.76155	7.53138	7.49985	7.2854	7.64386	7.48382	7.33092	7.83289	8.25267	7.73471
459_m5	10.4	21.4	30.4	36.1	40.4	43.8	44.8	46.9	51.1	53.6	55.4	57.6	60.2	60.9	63.1	64.3	65.7	67.6	116	222	247	200	156	235	134	253	314	388	498	444	473	517	473	446	408	408	6.85798	7.79442	7.94837	7.64386	7.2854	7.87652	7.06609	7.98299	8.29462	8.59991	8.96	8.79442	8.8857
463_m1	14.9	23.4	30.1	36.6	40.1	45.1	42.7	49.4	50.7	54.1	55.2	56.5	58.1	59.9	60.8	63.4	65.8	67	182	245	182	214	227	256	197	321	219	277	239	270	269	331	210	155	383	373	7.50779	7.93664	7.50779	7.74147	7.82655	8	7.62205	8.32643	7.77479	8.11374	7.90087	8.07682	8.07146
464_m2	15.3	24.4	31.6	36.2	39.6	43	43.7	44.4	45.9	46.2									223	250	182	245	293	561	512	579	493	600									7.8009	7.96578	7.50779	7.93664	8.19476	9.13186	9	9.17742	8.94544	9.22882
465_m3	15.2	22.8	30.3	36.2	40.4	46.2	48.7	50.6	54.5	57.6	59	61.1	63.7	63.6	65.4	68.5	70.2	70.4	168	277	200	247	155	289	193	252	212	240	199	274	357	223	222	207	278	240	7.39232	8.11374	7.64386	7.94837	7.27612	8.17493	7.59246	7.97728	7.72792	7.90689	7.63662	8.09803	8.47978
466_m4	15.4	24.4	31.4	36.5	40.1	45	47.3	49.4	52.6	49.2									178	236	263	201	288	480	397	499	523	156									7.47573	7.88264	8.03892	7.65105	8.16993	8.90689	8.633	8.9629	9.03067	7.2854
470_m1	10.8	16.4	23.6	28.4	30.9	35.7	37.4	39.2	42.9	44.8	47.2	49.8	51	51.5	53.1	55.3	56.7	58.5	183	262	206	242	173	185	167	218	163	234	188	190	225	280	258	308	269	182	7.5157	8.03342	7.6865	7.91886	7.43463	7.53138	7.3837	7.76818	7.34873	7.87036	7.55459	7.56986	7.81378
471_m2	10.4	17.5	26.9	35.2	39.9	44.4	47.9	50.6	56.3	58.9	62	65.7	68.8	71.4	74.3	75.2	73.3	69.1	135	139	184	248	237	278	208	228	450	367	406	339	384	600	520	528	599	356	7.07682	7.11894	7.52356	7.9542	7.88874	8.11894	7.70044	7.83289	8.81378	8.51964	8.66534	8.40514	8.58496
472_m3	10.7	18.6	27	33.9	38.7	43.3	45.8	48	52.2	55.2	56.9	60.4	63.4	65	67.2	69.6	71.2	74.6	212	247	202	197	196	318	184	204	255	334	285	344	398	436	454	358	435	520	7.72792	7.94837	7.65821	7.62205	7.61471	8.31288	7.52356	7.67243	7.99435	8.3837	8.15482	8.42626	8.63662
478_m1	22.4	31	37.4	41.6	44.8	46.3	51.3	56.6	57.9	61.1	63.2	65.7	67.7	69.4	72.4	75.3	78.2	79.5	225	269	278	231	172	239	170	293	215	214	233	296	221	152	170	190	245	198	7.81378	8.07146	8.11894	7.85175	7.42626	7.90087	7.40939	8.19476	7.74819	7.74147	7.86419	8.20945	7.7879
479_m2	23.2	34.4	39.9	43.6	44.8	46.3	48.7	50.7	48.3	52.5	54.6	57.3	60.1	61.2	61.6	62.4	64.7	64.9	201	236	219	189	175	153	146	193	129	133	132	212	201	196	213	230	255	137	7.65105	7.88264	7.77479	7.56224	7.45121	7.25739	7.18982	7.59246	7.01123	7.05528	7.04439	7.72792	7.65105
480_m3	20.9	30.5	36.7	40.8	42.9	45.1	48.2	51.7	52.5	56	59.2	60.6	61.8	63.4	65.5	67.3	68.6	71.7	210	212	169	222	271	234	160	263	320	308	459	486	461	454	460	282	432	439	7.71425	7.72792	7.40088	7.79442	8.08215	7.87036	7.32193	8.03892	8.32193	8.26679	8.84235	8.92481	8.84862
481_m4	19.3	29.4	34.9	39.1	40.4	43.3	48.1	51.2	51.1	56	60.4	62.6	64.4	65.6	67.4	70.3	71.8	71.7	212	287	214	134	150	182	148	265	185	342	412	410	532	474	451	423	409	490	7.72792	8.16491	7.74147	7.06609	7.22882	7.50779	7.20945	8.04985	7.53138	8.41785	8.6865	8.67948	9.05528
482_m5	18.7	30.5	38.4	43.5	46.1	46.8	46.8	46.6	45.2	40.6									206	225	354	368	475	551	510	600	537	600									7.6865	7.81378	8.46761	8.52356	8.89178	9.10591	8.99435	9.22882	9.06878	9.22882
483_m6	22	33.2	38.5	41.8	45.6	46.7	50.1	52.8	53.4	58.2	59.8	61.2	62.2	62.2	65.7	68.8	71.6	74.8	251	200	363	116	284	173	128	305	193	331	254	265	309	293	280	258	245	383	7.97154	7.64386	8.50383	6.85798	8.14975	7.43463	7	8.25267	7.59246	8.37069	7.98868	8.04985	8.27146
484_m7	18.4	31.3	40.8	45.2	48.8	48.8	41.6	38.9											202	249	357	309	550	600	532	502											7.65821	7.96	8.47978	8.27146	9.10329	9.22882	9.05528	8.97154
489_m1	19.7	30	37.4	41	44.2	46.1	48.9	53.7	56.6	60.8	63.9	64.6	55.2	50.5	48.4	43	40.7	80.6	180	323	252	191	189	180	151	265	364	488	484	430	182	517	504	469	500	339	7.49185	8.33539	7.97728	7.57743	7.56224	7.49185	7.2384	8.04985	8.50779	8.93074	8.91886	8.74819	7.50779
490_m2	20.6	30.5	38	42.5	44.8	47.1	50.2	54	56.1	60.7	63.2	66.1	67.5	71.8	74.2	77.3	79.5		168	230	194	245	161	188	308	192	288	441	393	412	332	360	368	321	410		7.39232	7.84549	7.59991	7.93664	7.33092	7.55459	8.26679	7.58496	8.16993	8.78463	8.61839	8.6865	8.37504
491_m3	17.3	27.8	35.7	41.3	45.7	48.3	50.7	55.7	57.1	61.9	64.5	68.1	68.9	73.9	77.4	80.7	78.7		177	296	202	457	425	460	511	600	502	534	600	600	551	461	585	552	600		7.46761	8.20945	7.65821	8.83605	8.73132	8.84549	8.99718	9.22882	8.97154	9.0607	9.22882	9.22882	9.10591
492_m4	23	34.4	41.6	44.4	45.2	44.7	43.9	46.1											194	273	523	489	561	475	600	600											7.59991	8.09276	9.03067	8.93369	9.13186	8.89178	9.22882	9.22882
493_m5	18.1	28.5	36.4	41.6	44.5	47.1	49.3	52.8	55.6	59.7	63.2	64.8	68.8	71.7	74.9	77.2	79.3	81.5	193	270	202	232	186	190	149	262	212	320	207	209	321	245	241	207	226	255	7.59246	8.07682	7.65821	7.85798	7.53916	7.56986	7.21917	8.03342	7.72792	8.32193	7.69349	7.70736	8.32643
494_m6	18.3	28	37	41.4	44.6	47.7	50.9	53.8	56.1	60.6	63.9	63.4	60.7	62.9	69.5	72.1	73.2	76.1	215	294	250	215	380	295	216	355	320	470	414	227	139	218	279	212	233	289	7.74819	8.19967	7.96578	7.74819	8.56986	8.20457	7.75489	8.47168	8.32193	8.87652	8.69349	7.82655	7.11894
495_m7	16.8	27.6	34.8	40.4	43.9	46.8	49.5	53.7	56	60.2	63.3	66.2	69.8	72.4	75.5	78.4	79.2	83.2	187	209	201	205	191	185	302	388	399	445	374	312	441	405	480	395	331	518	7.54689	7.70736	7.65105	7.67948	7.57743	7.53138	8.2384	8.59991	8.64024	8.79766	8.54689	8.2854	8.78463
500_m1	19.4	31.8	41.3	45	50.7	51.5	54.7	47											170	257	266	276	546	515	519	491											7.40939	8.00562	8.05528	8.10852	9.09276	9.00843	9.01959	8.93958
501_m2	16.2	28.8	37.3	42.1	47.1	45.8	46.3	44.4	44.9	44.9	45.5	45.2	44.2	45.6	45.4	46.2	46.6	46.7	161	223	269	299	486	425	499	537	592	600	592	600	533	600	600	600	578	258	7.33092	7.8009	8.07146	8.224	8.92481	8.73132	8.9629	9.06878	9.20945	9.22882	9.20945	9.22882	9.05799
502_m3	16.5	25.2	33.6	41.4	48.6	49.9	50.2	53.4	54.8	58	62	62.8	65.6	67	51.1	68.5	69.6	72.2	203	200	193	288	250	146	162	179	165	250	146	157	196	138	135	124	131	192	7.66534	7.64386	7.59246	8.16993	7.96578	7.18982	7.33985	7.48382	7.36632	7.96578	7.18982	7.29462	7.61471
503_m4	16.2	27.8	35	39.2	43.9	44.8	48.7	49.6	50.8	50.5	54.4	55	57.5	58.4	60.4	63.3	65.2	67.9	188	197	302	288	506	303	578	516	289	292	287	404	458	485	507	493	446	517	7.55459	7.62205	8.2384	8.16993	8.98299	8.24317	9.17493	9.01123	8.17493	8.18982	8.16491	8.65821	8.8392
504_m5	19.1	27.7	32.7	36.9	39.5	37.1	43.8	47.2	49.1	52	55.2	55.7	55.8	58.9	59	61.3	63	66.6	195	220	179	238	197	247	169	150	177	195	238	187	172	203	152	165	143	231	7.60733	7.78136	7.48382	7.89482	7.62205	7.94837	7.40088	7.22882	7.46761	7.60733	7.89482	7.54689	7.42626
505_m6	17.6	28.4	35.8	40.1	44.3	45.8	47.7	46.7	47.5	45.3	46	46.3	48.6	49.1	50.6	51.8	53.3	54.8	198	201	189	265	464	210	375	161	152	185	173	115	182	151	122	135	172	149	7.62936	7.65105	7.56224	8.04985	8.85798	7.71425	8.55075	7.33092	7.24793	7.53138	7.43463	6.84549	7.50779
506_m7	16.6	27.7	36	40.2	45.5	48.4	49.7	49.6	50.1	48.4	48.5	48.3	50.1	49	51.4	51.3	57	49.9	218	231	281	321	593	533	584	600	534	600	600	600	600	600	600	600	600	600	7.76818	7.85175	8.13443	8.32643	9.21189	9.05799	9.18982	9.22882	9.0607	9.22882	9.22882	9.22882	9.22882
510_m1	16.1	25.6	32.6	37.4	41.7	45.2	46.8	50.4	51.2	55	58.7	59.7	60	60					146	199	214	218	396	411	405	447	489	369	496	432	521	408					7.18982	7.63662	7.74147	7.76818	8.62936	8.68299	8.66178	8.80413	8.93369	8.52748	8.9542	8.75489	9.02514
511_m2	14.4	23.1	30.9	35.3	39.5	42.3	45.2	48.2	48.7	51.8	54.2	55.7	57.6	58.6	60.6	62.5	64.1	65.4	177	241	195	258	197	182	180	238	165	293	337	346	472	362	552	496	431	526	7.46761	7.91289	7.60733	8.01123	7.62205	7.50779	7.49185	7.89482	7.36632	8.19476	8.3966	8.43463	8.88264
512_m3	16.2	29.4	39.7	44	47.8	47.8	50	52.1	51.2	42.1									182	203	431	470	553	516	596	572	600	600									7.50779	7.66534	8.75154	8.87652	9.11114	9.01123	9.21917	9.15987	9.22882	9.22882
513_m4	12.9	20.2	27	33.1	39.4	43.4	46	51.2	51.5	54.8	56.6	58.2	59.9	62	63.7	65.4	67.8	70.7	183	177	263	216	195	192	202	168	174	251	240	289	357	308	311	304	305	397	7.5157	7.46761	8.03892	7.75489	7.60733	7.58496	7.65821	7.39232	7.44294	7.97154	7.90689	8.17493	8.47978
514_m5	14.1	22.9	30.3	36.5	43.8	49.5	50.5	55.1	56.9	62.1	64.2	66.5	68.8	68.8	69	72.3	74.8	79.2	202	216	233	287	210	195	187	182	253	296	337	308	391	178	323	341	344	334	7.65821	7.75489	7.86419	8.16491	7.71425	7.60733	7.54689	7.50779	7.98299	8.20945	8.3966	8.26679	8.61102
515_m6	13.7	22.4	29.7	33.9	39.6	41.3	44.7	48.9	50.6	52.8	56.2	58.4	59	59.8	60.6	60.9	59.9	59.7	173	212	291	187	193	131	206	284	355	310	320	481	485	600	600	600	492	600	7.43463	7.72792	8.18488	7.54689	7.59246	7.03342	7.6865	8.14975	8.47168	8.27612	8.32193	8.90989	8.92184
516_m7	10.9	19.9	29.6	33.6	38.5	39.2	40.3	45.1	45.7	50.9	54.8	56.3	57.9	59.5	61.1	63.7	65.3	67.3	167	181	250	185	184	128	147	261	134	221	268	240	279	216	178	226	245	327	7.3837	7.49985	7.96578	7.53138	7.52356	7	7.19967	8.02791	7.06609	7.7879	8.06609	7.90689	8.12412
521_m1	11	21.4	31.4	34.5	38.3	42	45.8	48.3	49.8	52.8	55.3	56.5	59.7						148	222	263	121	168	144	188	177	179	188	219	239	371						7.20945	7.79442	8.03892	6.91886	7.39232	7.16993	7.55459	7.46761	7.48382	7.55459	7.77479	7.90087	8.53528
522_m2	10.4	19.8	29.3	33.6	36.8	42.2	46.4	53.3	52.9	56.4	58.3	62.1	64	65.4	66.4	68.9	71.1	74	131	185	206	199	173	165	205	212	244	363	324	414	284	438	374	415	327	416	7.03342	7.53138	7.6865	7.63662	7.43463	7.36632	7.67948	7.72792	7.93074	8.50383	8.33985	8.69349	8.14975
523_m3	12.2	22.1	32.2	38.1	42.8	42.2	50.1	54.8	56.2	58	60.4	61.9	64.5	65	65.7	67.2	68.3	69.4	154	190	326	272	393	490	488	600	596	572	530	600	540	534	600	499	562	591	7.26679	7.56986	8.34873	8.08746	8.61839	8.93664	8.93074	9.22882	9.21917	9.15987	9.04985	9.22882	9.07682
524_m4	10	18.8	28.1	33.3	37.9	41	42.1	45.4	45.4	48.1	50	51.5	53	54.2	56.1	58	59.2	61	135	205	180	215	286	155	144	137	169	154	158	224	193	174	306	297	165	201	7.07682	7.67948	7.49185	7.74819	8.15987	7.27612	7.16993	7.09803	7.40088	7.26679	7.30378	7.80735	7.59246
525_m5	10	19.2	28.9	35.5	40.5	44.6	48	52	53.1	54.9	56.4	57.8	60.6	61.5	64	66.1	67.2	68.9	164	227	193	284	206	166	198	158	159	205	160	273	281	363	313	222	209	244	7.35755	7.82655	7.59246	8.14975	7.6865	7.37504	7.62936	7.30378	7.31288	7.67948	7.32193	8.09276	8.13443
526_m6	13.4	23.1	30.6	35.7	40	42.7	44.8	48.3	49.7	53.1	54.2	55.1	56.5	57.4	57.8	60	60.3	61.9	138	212	221	246	183	174	194	195	202	322	257	288	227	326	307	287	252	361	7.10852	7.72792	7.7879	7.94251	7.5157	7.44294	7.59991	7.60733	7.65821	8.33092	8.00562	8.16993	7.82655
527_m7	10.3	18.4	26.5	31.7	37.9	42	44.3	47.3	48.2	50.7	51.6	54	56.6	58	58.2	57.1	57.5	59.8	153	212	231	283	215	146	168	270	167	251	227	344	248	210	215	203	117	203	7.25739	7.72792	7.85175	8.14466	7.74819	7.18982	7.39232	8.07682	7.3837	7.97154	7.82655	8.42626	7.9542
533_m1	9.3	17.5	27.5	34.1	38.8	42.7	45.5	49.4	50.9	54.9	56.6	57.6	60.5	61.9	64.1	66.2	68.6	69.9	186	234	219	176	213	294	227	232	227	337	271	274	446	415	299	283	370	271	7.53916	7.87036	7.77479	7.45943	7.73471	8.19967	7.82655	7.85798	7.82655	8.3966	8.08215	8.09803	8.8009
534_m2	13	21.3	30.5	37.6	41.8	45.7	46.9	50.7	50.4	52.2	52.5	52.5	52.1	52.8	53.3	53.6	53.2	53.6	227	187	245	165	278	414	457	498	600	500	600	514	524	522	600	555	593	586	7.82655	7.54689	7.93664	7.36632	8.11894	8.69349	8.83605	8.96	9.22882	8.96578	9.22882	9.00562	9.03342
535_m3	11.7	20.8	30.5	35.8	38.2	41.6	43.6	48.3	49.1	53.1	54.6	57.5	59.2	60.6	62	64.1	64.3	64.9	161	219	229	227	171	154	189	281	171	351	306	465	475	257	480	556	522	561	7.33092	7.77479	7.8392	7.82655	7.41785	7.26679	7.56224	8.13443	7.41785	8.45533	8.25739	8.86109	8.89178
536_m4	9.6	19.3	31.7	39.9	45.1	49.2	51.9	56.1	55.9	60.3	60.5	60.7	62	64.4	66.4	69	70.7	70.8	157	202	318	230	419	516	528	469	545	542	544	574	525	546	544	568	563	569	7.29462	7.65821	8.31288	7.84549	8.71081	9.01123	9.04439	8.87344	9.09011	9.08215	9.08746	9.16491	9.03617
537_m5	10.9	19.8	31.3	39.2	45.2	48.5	49.3	52.6	52.8	55	55.5	53.7	52.3	52	53.3	52.8	54.7	55.3	154	187	181	272	419	579	475	499	554	540	477	456	600	569	600	559	590	559	7.26679	7.54689	7.49985	8.08746	8.71081	9.17742	8.89178	8.9629	9.11374	9.07682	8.89785	8.83289	9.22882
544_m1	11.8	21.3	32.7	39.9	43.7	47.9	49.9	55.7	56.8	61.4	64.5	65	67.6	68.5	70.7	68.4	67.6	70.1	211	259	214	204	220	305	251	247	274	365	367	355	320	430	296	172	426	266	7.7211	8.01681	7.74147	7.67243	7.78136	8.25267	7.97154	7.94837	8.09803	8.51175	8.51964	8.47168	8.32193
545_m2	11.3	20.4	32.7	41.2	45.7	49.4	50.5	52	50.1	50.4	47.6	47.2	41.8						168	184	237	229	284	317	414	478	539	598	600	590	545						7.39232	7.52356	7.88874	7.8392	8.14975	8.30834	8.69349	8.90087	9.07414	9.224	9.22882	9.20457	9.09011
546_m3	11.8	19.9	28.8	36.1	39.2	42.5	44.4	47.9	49.3	53	54.9	55.5	57.6	60	61.9	64.3	66.3	66.7	144	224	214	200	257	205	193	195	211	209	326	361	266	530	254	443	453	339	7.16993	7.80735	7.74147	7.64386	8.00562	7.67948	7.59246	7.60733	7.7211	7.70736	8.34873	8.49586	8.05528
547_m4	11.9	21	31.6	37.5	41.5	45.3	48.3	52.5	54.7	57.3	59.9	60.3	61.8	64.4	65.2	67.1	68.5	69.7	183	199	185	182	221	173	150	200	247	240	262	201	200	439	184	143	150	153	7.5157	7.63662	7.53138	7.50779	7.7879	7.43463	7.22882	7.64386	7.94837	7.90689	8.03342	7.65105	7.64386
553_m1	11	20.9	33.5	41.2	44.4	47.2	46.9	48.8	47.9	47.8	47.5	48.5	46.9	44.1					131	211	200	262	401	600	592	595	600	600	525	600	600	410					7.03342	7.7211	7.64386	8.03342	8.64746	9.22882	9.20945	9.21675	9.22882	9.22882	9.03617	9.22882	9.22882
554_m2	12.1	21	31.2	38.8	43.1	48.6	50	53.3	55.7	61.5	64	65.8	69.3	68.6	70	73	74.5	74.5	118	211	235	202	228	294	217	439	264	376	309	438	482	403	513	512	557	519	6.88264	7.7211	7.87652	7.65821	7.83289	8.19967	7.76155	8.77808	8.04439	8.55459	8.27146	8.77479	8.91289
555_m3	12.5	20.9	32.3	40.5	44.5	46.7	48.9	52.6	54.3	58.4	62.1	65	69.3	71.6	74	77.9	80.1	82.8	168	182	220	218	193	233	187	197	178	302	248	352	444	355	357	440	459	423	7.39232	7.50779	7.78136	7.76818	7.59246	7.86419	7.54689	7.62205	7.47573	8.2384	7.9542	8.45943	8.79442
556_m4	12.2	21.5	33.6	40.2	43	46.7	49.5	52.6	55.1	59.5	62.9	64.7	68.7	69.9	72.5	74.9	77	80.8	142	251	222	190	216	252	235	225	216	257	354	265	376	260	409	279	247	352	7.14975	7.97154	7.79442	7.56986	7.75489	7.97728	7.87652	7.81378	7.75489	8.00562	8.46761	8.04985	8.55459
557_m5	10.3	18.6	29.4	35.7	39.9	42.8	46.4	49.2	50.7	53.5	56.6	58.2	61.5	61.5	64.3	66.3	68.2	69.3	131	191	210	169	166	163	162	530	183	157	167	200	302	186	185	184	238	214	7.03342	7.57743	7.71425	7.40088	7.37504	7.34873	7.33985	9.04985	7.5157	7.29462	7.3837	7.64386	8.2384
563_m1	11.2	21	30.4	35.7	35.9	38.6	41.7	47.1	48.8	52.3	56.3	58	61.1	62.7	64.1	67.1	70.6	72.9	131	243	265	174	206	163	203	190	166	369	412	373	487	408	358	402	441	360	7.03342	7.92481	8.04985	7.44294	7.6865	7.34873	7.66534	7.56986	7.37504	8.52748	8.6865	8.54303	8.92778
564_m2	12.2	21.4	31.3	36.8	40.5	44.1	47.6	52.1	55	57.5	61.4	61.8	65.6	65.2	68	69.8	72.8	74.6	134	230	204	198	213	214	341	293	435	526	470	505	475	471	600	485	486	498	7.06609	7.84549	7.67243	7.62936	7.73471	7.74147	8.41363	8.19476	8.76487	9.03892	8.87652	8.98014	8.89178
565_m3	11.4	20.3	29.8	35.7	36.2	35.6	35.1	37.8	38.4	40.3	42.4	43.3	45.5	47.1	49	53.6	55.1	56.9	155	253	300	201	225	238	217	168	197	153	181	178	162	200	156	213	188	179	7.27612	7.98299	8.22882	7.65105	7.81378	7.89482	7.76155	7.39232	7.62205	7.25739	7.49985	7.47573	7.33985
566_m4	11.3	20.5	31.7	39.1	43	47.4	49.6	54.9	56.5	59.5	63.2	64.8	66.8	67.5	61.7	58.3	59.6	57	139	238	217	194	234	372	415	506	516	514	600	577	534	564	524	580	552	542	7.11894	7.89482	7.76155	7.59991	7.87036	8.53916	8.69697	8.98299	9.01123	9.00562	9.22882	9.17243	9.0607
572_m1	10.1	16.7	26.3	32.3	36.7	41.2	43.9	48	50	54.1	55.9	56.5	59.6	60.2	61.6	63.9	65.9	66.2	125	235	283	273	219	243	300	289	411	427	512	472	530	479	573	487	445	471	6.96578	7.87652	8.14466	8.09276	7.77479	7.92481	8.22882	8.17493	8.68299	8.73809	9	8.88264	9.04985
573_m2	10.3	17.9	26	32.7	35.4	39	39.4	43.4	44.3	46.8	48.5	50.1	52.1	52.8	53.4	55	56.8	57.1	127	241	226	244	208	183	197	194	189	188	187	276	184	160	227	157	251	298	6.98868	7.91289	7.82018	7.93074	7.70044	7.5157	7.62205	7.59991	7.56224	7.55459	7.54689	8.10852	7.52356
574_m3	9.7	17.4	27.1	34.9	38.9	42.7	44	49.4	50.6	54.5	58.6	59.3	64.4	64.6	68.1	70.6	72.7	75.1	127	218	268	314	224	215	286	209	214	234	311	203	390	333	373	294	273	346	6.98868	7.76818	8.06609	8.29462	7.80735	7.74819	8.15987	7.70736	7.74147	7.87036	8.28077	7.66534	8.60733
579_m1	9.8	17.7	27.2	33.1	36.8	41.2	43.1	48.7	50.1	53.1	55.2	56.4	57.8	58.1	60.8	63.1	65.3	65.2	128	255	244	172	205	191	166	214	207	346	294	320	313	296	390	299	313	293	7	7.99435	7.93074	7.42626	7.67948	7.57743	7.37504	7.74147	7.69349	8.43463	8.19967	8.32193	8.29002
580_m2	8.8	16.3	26.1	33.4	37.5	40.7	42.1	47.5	48.3	50.3	53.3	54.3	56.5	56.4	57.8	61	64	65	159	220	272	222	188	158	206	239	207	150	179	229	216	144	156	222	284	220	7.31288	7.78136	8.08746	7.79442	7.55459	7.30378	7.6865	7.90087	7.69349	7.22882	7.48382	7.8392	7.75489
581_m3	9	16.5	25.1	32.3	34.5	38.4	41.3	43.9	45.5	48	50.5	51.8	54.3	54.2	55.3	53.7	45.5	39.3	132	201	266	191	188	135	177	217	235	474	413	551	529	477	540	403	467	527	7.04439	7.65105	8.05528	7.57743	7.55459	7.07682	7.46761	7.76155	7.87652	8.88874	8.69	9.10591	9.04712
582_m4	9.2	16.4	26.2	33.1	38.2	42.9	45	49.6	51.1	53.6	56.1	57	59	59.2	61.7	65.5	65.8	66.4	148	253	252	207	218	303	189	255	334	429	468	428	530	415	467	527	516	567	7.20945	7.98299	7.97728	7.69349	7.76818	8.24317	7.56224	7.99435	8.3837	8.74483	8.87036	8.74147	9.04985
588_m1	12.3	20.2	28.8	35.3	39.5	41.5	47.5	48.9	51.6	53.2	54.7	56.7	57	58.1	59.4	61.9	63.1	65.8	161	258	192	166	155	198	154	212	280	187	272	302	320	245	192	264	270	201	7.33092	8.01123	7.58496	7.37504	7.27612	7.62936	7.26679	7.72792	8.12928	7.54689	8.08746	8.2384	8.32193
589_m2	14	23.8	32.8	37.5	41.3	43.1	47.8	48.9	52.2	54.1	56.8	58.6	59.8	60.9	62.4	63.9	65.5	67.6	200	212	170	167	177	224	254	217	341	349	500	588	484	525	474	518	473	455	7.64386	7.72792	7.40939	7.3837	7.46761	7.80735	7.98868	7.76155	8.41363	8.44708	8.96578	9.19967	8.91886
590_m3	12.3	20.2	27.6	34.5	39.7	40.2	47	48.7	53.1	55.4	57.9	60.4	61.3	63.5	64.3	67.3	69.4	71.6	220	187	169	299	176	220	134	178	164	203	333	251	213	290	240	200	241	211	7.78136	7.54689	7.40088	8.224	7.45943	7.78136	7.06609	7.47573	7.35755	7.66534	8.37938	7.97154	7.73471
591_m4	11.4	19.9	28	35.5	41.5	44.5	51.2	52.2	57.1	60	62.8	64.3	66.2	68.5	71	73.5	75.9	79.6	195	258	210	184	227	264	182	179	225	296	389	327	239	271	316	251	265	205	7.60733	8.01123	7.71425	7.52356	7.82655	8.04439	7.50779	7.48382	7.81378	8.20945	8.60363	8.35315	7.90087
592_m5	11	19	28.1	35.6	40.3	42.2	47.2	48.2	50.7	53.7	56	57.8	59.8	61.5	63.7	65.6	67.8	69.7	165	252	223	171	302	306	179	291	213	404	323	263	300	307	289	282	234	331	7.36632	7.97728	7.8009	7.41785	8.2384	8.25739	7.48382	8.18488	7.73471	8.65821	8.33539	8.03892	8.22882
599_m1	12	21.5	31.6	38.7	41.8	43.1	48.4	49.2	52.2	55.4	58.4	59.7	60.3	62.5	63	65.2	65.9	67.2	197	214	166	204	156	216	372	198	266	391	431	405	419	391	286	319	354	287	7.62205	7.74147	7.37504	7.67243	7.2854	7.75489	8.53916	7.62936	8.05528	8.61102	8.75154	8.66178	8.71081
600_m2	12	18.6	26.2	32.1	35.1	35.6	42	42.8	47.6	51.3	54.7	55.4	56	58.7	61.2	63.4	65	67.5	180	207	208	189	153	227	178	168	189	216	219	216	230	296	226	238	297	281	7.49185	7.69349	7.70044	7.56224	7.25739	7.82655	7.47573	7.39232	7.56224	7.75489	7.77479	7.75489	7.84549
601_m3	12.7	21.6	30.2	36.1	40	40.5	45.6	46.6	49.3	51.4	54.6	57.6	57.7	58.3	60.2	62.4	63.6	65.8	185	217	226	226	203	277	162	211	176	195	315	390	297	311	234	287	268	268	7.53138	7.76155	7.82018	7.82018	7.66534	8.11374	7.33985	7.7211	7.45943	7.60733	8.29921	8.60733	8.21432
602_m4	12.8	22	30.6	35	39.4	40.5	45.5	47.2	50	52.8	56.3	57.8	57.6	59.4	61.6	63.7	64.1	65.8	214	210	195	240	181	273	206	221	482	464	451	496	517	462	470	451	478	382	7.74147	7.71425	7.60733	7.90689	7.49985	8.09276	7.6865	7.7879	8.91289	8.85798	8.81698	8.9542	9.01402
603_m5	13.3	21.2	25.5	23.8	25.8	28.6	28.7	29.6	30.2	31.2	32.4	32	32						185	187	147	154	174	141	139	210	159	195	129	129	87						7.53138	7.54689	7.19967	7.26679	7.44294	7.13955	7.11894	7.71425	7.31288	7.60733	7.01123	7.01123	6.44294
609_m1	5.4	11	17.7	24.2	31.6	36.7	44.9	47.3	50.5	52	52.1	51.6	40.7	48.9					88	240	213	261	207	210	512	390	523	600	531	600	600	600					6.45943	7.90689	7.73471	8.02791	7.69349	7.71425	9	8.60733	9.03067	9.22882	9.05257	9.22882	9.22882
610_m2	10.5	17.2	23.3	28.2	33.1	33.8	39.1	40.3	43.4	44.3	47.1	49.4	49.1	51.2	53	52.6	52.4	53.9	149	240	227	303	157	186	194	199	146	154	126	176	215	151	161	166	199	143	7.21917	7.90689	7.82655	8.24317	7.29462	7.53916	7.59991	7.63662	7.18982	7.26679	6.97728	7.45943	7.74819
611_m3	8.5	16.3	24.9	30.9	34.7	36.5	42.9	44.9	48.2	50.9	53.9	56	57.3	57.6	60.2	61.5	62.1	62.8	125	286	230	176	209	176	182	151	177	145	246	246	237	255	316	239	236	268	6.96578	8.15987	7.84549	7.45943	7.70736	7.45943	7.50779	7.2384	7.46761	7.17991	7.94251	7.94251	7.88874
612_m4	8.2	15.5	23	28.6	33.7	37.2	43	44.2	47.3	48.4	52	52.9	54.2	54.9	57.6	57.9	58.9	59.4	144	238	204	157	114	153	178	169	129	111	245	124	176	177	281	218	266	192	7.16993	7.89482	7.67243	7.29462	6.83289	7.25739	7.47573	7.40088	7.01123	6.79442	7.93664	6.9542	7.45943
618_m1	13	22.5	32.5	39.9	44	50.1	51.8	54.1	57.8	60.2	63.4	66.3	68.5	72.4	73.3	74.7	76.2	78.7	142	202	200	207	174	129	190	164	179	244	231	222	211	296	234	224	223	193	7.14975	7.65821	7.64386	7.69349	7.44294	7.01123	7.56986	7.35755	7.48382	7.93074	7.85175	7.79442	7.7211
619_m2	14	25	32.9	39.9	44	51.8	52.4	56.3	58.9	62.8	65	67.8	69.5	73.4	74.7	77.4	78.4	80.8	150	189	188	178	158	174	177	162	262	342	223	300	301	376	231	206	243	205	7.22882	7.56224	7.55459	7.47573	7.30378	7.44294	7.46761	7.33985	8.03342	8.41785	7.8009	8.22882	8.23362
620_m3	13.9	24.6	33.1	39.9	45	49.7	50.2	53.2	56.2	59.2	60.4	63.5	63.3	66.1	66.5	67.4	67.3	68.4	200	226	226	263	176	191	188	258	303	357	296	395	279	404	383	316	295	217	7.64386	7.82018	7.82018	8.03892	7.45943	7.57743	7.55459	8.01123	8.24317	8.47978	8.20945	8.62571	8.12412
621_m4	13.6	24.4	34.7	41.7	45.9	50.3	50.1	51.3	51.2	53.1	51.9	51.6	51.1	51.4	50.6	46.5	45.4	46.5	184	228	199	392	439	600	562	600	468	600	521	501	489	445	444	429	377	424	7.52356	7.83289	7.63662	8.61471	8.77808	9.22882	9.13443	9.22882	8.87036	9.22882	9.02514	8.96867	8.93369
622_m5	14.1	24.9	35.1	42.8	46.6	52.5	54.6	58.6	61.3	64.5	67.9	70.8	74.1	78.7	81	84.5	85.3	88	157	242	232	256	209	265	247	371	353	218	340	467	396	439	442	472	480	396	7.29462	7.91886	7.85798	8	7.70736	8.04985	7.94837	8.53528	8.46352	7.76818	8.40939	8.86728	8.62936
628_m1	13.1	22.4	31.7	42.8	44.4	50.3	51.9	55.2	58.4	61.4	61.8	64.4	65.4	63.4	58.1	59.9	63.7	71.2	127	258	229	229	177	337	256	359	406	456	401	499	573	472	345	395	436	393	6.98868	8.01123	7.8392	7.8392	7.46761	8.3966	8	8.48784	8.66534	8.83289	8.64746	8.9629	9.16239
629_m2	13.4	25.2	34.4	38.1	41.7	45.1	46.3	46.4	48.5										124	223	165	169	164	129	130	151	128										6.9542	7.8009	7.36632	7.40088	7.35755	7.01123	7.02237	7.2384	7
630_m3	12.7	23.9	33.8	40.4	45.3	51.2	52.3	55.8	57.9	60.4	61.2	64.3	66.1	68.9	70.6	72.3	74	74.2	215	277	177	241	178	143	197	224	212	236	203	459	259	354	188	181	274	155	7.74819	8.11374	7.46761	7.91289	7.47573	7.15987	7.62205	7.80735	7.72792	7.88264	7.66534	8.84235	8.01681
631_m4	12.6	22.2	29.5	34.4	37.8	43.3	44.9	47.2	48.4	53.3	54.9	58	58.1	59	59.7	61.7	62.2	63.6	143	217	230	166	182	108	149	179	122	126	143	135	174	132	158	145	136	140	7.15987	7.76155	7.84549	7.37504	7.50779	6.75489	7.21917	7.48382	6.93074	6.97728	7.15987	7.07682	7.44294
632_m5	12.2	21.8	31.6	37.2	41.2	47.1	49.1	51.3	52.9	55.5	55.1	56.8	57.8	60.2	60.6	62.3	63.3	63.4	158	246	252	180	209	415	490	372	504	600	536	600	546	574	600	600	600	600	7.30378	7.94251	7.97728	7.49185	7.70736	8.69697	8.93664	8.53916	8.97728	9.22882	9.06609	9.22882	9.09276
638_m1	12.2	20.6	28	35.2	38	42.5	41.6	45.3	43.8	44.2	44.7	46.8	47.1	51.8	51.5	52.6	53.4	53.3	143	251	217	249	191	171	179	177	223	211	156	176	145	132	166	136	156	128	7.15987	7.97154	7.76155	7.96	7.57743	7.41785	7.48382	7.46761	7.8009	7.7211	7.2854	7.45943	7.17991
639_m2	12.4	22.6	32.5	38.9	42.5	47.8	48.8	51.2	52.4	55.9	53.6	53.2	52	52.8	52.5	53.3	51	47.7	138	206	244	303	283	389	488	501	486	503	600	600	574	536	594	600	591	600	7.10852	7.6865	7.93074	8.24317	8.14466	8.60363	8.93074	8.96867	8.92481	8.97441	9.22882	9.22882	9.16491
640_m3	13	22.4	30	37.7	42.7	47.5	48.3	52.3	55.9	58.9	62	62.3	63.2	66.5	65.6	67.4	67.4	69.6	153	184	202	230	196	244	179	307	502	533	499	480	600	581	565	561	600	600	7.25739	7.52356	7.65821	7.84549	7.61471	7.93074	7.48382	8.26209	8.97154	9.05799	8.9629	8.90689	9.22882
641_m4	13.2	25.3	35.8	40	42.3	47.4	48.8	52.7	54.5	58	62	64.6	64.8	52.5					146	215	272	221	265	198	210	473	341	414	451	571	549	600					7.18982	7.74819	8.08746	7.7879	8.04985	7.62936	7.71425	8.8857	8.41363	8.69349	8.81698	9.15735	9.10066
642_m5	10.3	20.8	32.6	40.5	45.5	49	50.5	54.2	54.8										161	200	207	281	409	395	423	539	492										7.33092	7.64386	7.69349	8.13443	8.67596	8.62571	8.72451	9.07414	8.94251
647_m1	9	19	29	36.4	41.8	48	49.7	53.2	56.6	58.1	49.3	48.6	48.7	54.3	57.4	62.9			140	223	221	232	353	500	466	433	445	470	64	162	206	194	188	230			7.12928	7.8009	7.7879	7.85798	8.46352	8.96578	8.86419	8.75822	8.79766	8.87652	6	7.33985	7.6865
648_m2	13.8	22.7	28.7	33.3	36.1	39.1	39.6	42.2	44.6	46.5	48.8	50.5	50.7	50.9	52	53.6	53.3	54.1	174	225	225	205	202	170	212	143	204	203	238	233	193	194	169	196	157	200	7.44294	7.81378	7.81378	7.67948	7.65821	7.40939	7.72792	7.15987	7.67243	7.66534	7.89482	7.86419	7.59246
649_m3	10.9	19.4	27.5	32.7	35.7	40.3	39.9	42.6	45.5	48	51.7	53.5	53.7	55.7	56.6	57.9	56	56.2	144	241	190	220	247	132	179	157	305	458	477	508	581	164	594	600	600	600	7.16993	7.91289	7.56986	7.78136	7.94837	7.04439	7.48382	7.29462	8.25267	8.8392	8.89785	8.98868	9.18239
655_m1	14.8	26.2	36.2	41.3	47.5	49.1	48	48.6	49.1	50.4	49.9	50.8	54						188	200	140	280	413	525	568	575	568	600	600	576	600						7.55459	7.64386	7.12928	8.12928	8.69	9.03617	9.14975	9.16742	9.14975	9.22882	9.22882	9.16993	9.22882
656_m2	13.9	25.9	37.7	43.7	48.2	49.8	50.4	44.7											139	207	225	502	452	600	600	534											7.11894	7.69349	7.81378	8.97154	8.82018	9.22882	9.22882	9.0607
657_m3	12.5	22.8	33.2	36.9	41.5	42.1	43.7	44.6	43.9	44.7	44.9	44.9	45.8	44.1	44.3	45.6	43.7	44.2	132	182	136	294	544	522	591	569	452	549	502	496	518	522	543	465	537	502	7.04439	7.50779	7.08746	8.19967	9.08746	9.02791	9.20701	9.15228	8.82018	9.10066	8.97154	8.9542	9.01681
658_m4	15.5	27	37.5	41	46.6	47.6	49.2	51.5	51.7	52.1	45.9								162	226	163	225	484	582	509	567	556	576	83								7.33985	7.82018	7.34873	7.81378	8.91886	9.18488	8.99152	9.1472	9.11894	9.16993	6.37504
659_m5	12.4	22.8	33.9	39.6	46	47.5	50.9	53	48.3	50.7	52.6	56.3	58.6	58.8	51.5	51.1			180	187	155	207	465	363	440	312	99	303	222	365	482	535	487	600			7.49185	7.54689	7.27612	7.69349	8.86109	8.50383	8.78136	8.2854	6.62936	8.24317	7.79442	8.51175	8.91289
668_m1	14.1	25.8	37.1	42.1	47.1	48	50.5	53.3	52	43.4	36.4								152	185	326	517	545	478	492	550	600	402	409								7.24793	7.53138	8.34873	9.01402	9.09011	8.90087	8.94251	9.10329	9.22882	8.65105	8.67596
669_m2	13.4	23.6	33.8	38	43.2	45.6	50.1	52.2	54.3	57	58.6	60.7	61.7	62.2	64.6	67.8	68.3	71.4	135	179	172	229	228	263	301	383	424	422	430	537	483	493	448	522	499	568	7.07682	7.48382	7.42626	7.8392	7.83289	8.03892	8.23362	8.5812	8.72792	8.7211	8.74819	9.06878	8.91588
670_m3	13.8	25.6	36.8	41.1	47.4	49.3	53	55.1	55.9										172	172	173	292	444	435	508	527	517										7.42626	7.42626	7.43463	8.18982	8.79442	8.76487	8.98868	9.04166	9.01402
671_m4	12.3	22.9	35.1	40.2	45.4	47.6	50.3	51.4	53.3	56.3	57.5	57.9	60.9	58.9	62	63.9	66.3	61.6	184	207	172	345	542	429	469	537	539	562	518	590	511	502	490	524	515	600	7.52356	7.69349	7.42626	8.43045	9.08215	8.74483	8.87344	9.06878	9.07414	9.13443	9.01681	9.20457	8.99718
678_m1	9.1	18.1	26.7	32.1	39	41.4	46.4	49.3	52.3	52.2	55	56.9	58.7	59.4	58.9				124	235	162	224	178	326	481	330	414	287	403	459	578	450	379				6.9542	7.87652	7.33985	7.80735	7.47573	8.34873	8.90989	8.36632	8.69349	8.16491	8.65464	8.84235	9.17493
679_m2	11.1	21.4	31.8	37	44.3	47.6	51.3	51.9	52.1	49.1	47.6	45.9	47	46.9	44.7	38.6			153	177	170	172	292	325	528	600	600	600	549	600	568	538	493	360			7.25739	7.46761	7.40939	7.42626	8.18982	8.3443	9.04439	9.22882	9.22882	9.22882	9.10066	9.22882	9.14975
680_m3	12	19.2	25.6	28.3	35	37.8	41.1	43.3	46.8	49.4	51.9	53.4	55	55.4	58.1	60.1	61.7	61.6	131	158	187	194	187	196	149	183	200	263	450	337	436	309	321	273	316	385	7.03342	7.30378	7.54689	7.59991	7.54689	7.61471	7.21917	7.5157	7.64386	8.03892	8.81378	8.3966	8.76818
681_m4	10.7	20.6	30.8	36.9	43.9	46.2	50	52.5	56.9	60.2	63.2	65.2	67.1	67.7	71.4	70.9	71.9	69.5	123	196	202	234	181	213	369	319	407	429	507	503	508	450	456	462	527	555	6.94251	7.61471	7.65821	7.87036	7.49985	7.73471	8.52748	8.31741	8.66888	8.74483	8.98584	8.97441	8.98868
682_m5	9.1	17.9	26.7	32.1	40	42.6	46.4	48.8	50	54.2	56.9	55.2	57.5	56.1	57.2	59.5	59.2	56.2	138	170	184	317	180	168	254	279	188	408	398	354	440	481	450	438	506	584	7.10852	7.40939	7.52356	8.30834	7.49185	7.39232	7.98868	8.12412	7.55459	8.67243	8.63662	8.46761	8.78136
700_m1	11.5	22.2	32.2	43.1	46.3	47.8	49.4	51.3	53.5	55	54.8	55.8	56.4	56.7	56.6	57.2	54.8	53.9	156	159	211	428	490	600	593	526	600	600	594	567	600	583	600	600	592	503	7.2854	7.31288	7.7211	8.74147	8.93664	9.22882	9.21189	9.03892	9.22882	9.22882	9.21432	9.1472	9.22882
701_m2	11.2	23.3	33.1	43.6	46.9	49.1	52.6	54.2	56.4	58.4	59.6	61.7	61.2	62.2	63.3	63.8	65.3	65.1	160	222	236	399	557	597	551	600	585	600	598	600	600	600	600	547	600	600	7.32193	7.79442	7.88264	8.64024	9.12153	9.22159	9.10591	9.22882	9.19229	9.22882	9.224	9.22882	9.22882
702_m3	14	27	36.3	43.8	47	51.4	54.2	57.5	59.8	61.8	64.8	67	69.7	72	75.8	71.4	73.1	73.6	190	219	244	179	390	515	287	485	402	600	488	466	505	507	582	492	520	283	7.56986	7.77479	7.93074	7.48382	8.60733	9.00843	8.16491	8.92184	8.65105	9.22882	8.93074	8.86419	8.98014
703_m4	12.5	21.6	29.7	39	40	42.5	46.5	49.6	53.9	56.3	60.4	62.6	60.8	64.5	61.9	64.8	64	63.9	177	209	256	151	193	185	250	262	287	347	462	450	241	290	287	470	600	490	7.46761	7.70736	8	7.2384	7.59246	7.53138	7.96578	8.03342	8.16491	8.43879	8.85175	8.81378	7.91289
704_m5	11.1	21.8	31.2	41.5	44.1	47.9	51.2	54.5	57.8	60	63	64.5	63.7	63.2	61.8	55.1	50		141	248	225	249	284	381	260	284	326	355	511	413	374	460	536	517	584		7.13955	7.9542	7.81378	7.96	8.14975	8.57365	8.02237	8.14975	8.34873	8.47168	8.99718	8.69	8.54689
705_m1	13.9	25	33.2	41.8	43.9	46.8	51.5	55.4	59.2	62.2	65.4	68.8	70.8	73.9	76.7	78	81.3	79.4	181	239	244	309	152	218	191	414	402	514	497	482	427	453	418	448	509	284	7.49985	7.90087	7.93074	8.27146	7.24793	7.76818	7.57743	8.69349	8.65105	9.00562	8.9571	8.91289	8.73809
706_m2	13.1	24.9	34.6	41.7	42.8	45.1	49.4	51.3	54.4	57.3	58.3	61.7	63.4	65.9	68.5	69	71.2	72.7	181	254	223	286	347	454	323	381	464	507	545	519	516	533	478	522	600	587	7.49985	7.98868	7.8009	8.15987	8.43879	8.82655	8.33539	8.57365	8.85798	8.98584	9.09011	9.01959	9.01123
707_m3	10.9	21.9	31.2	39.3	41.9	43.4	46	46.9	46.8	46.7	46.8	47.6	67.7	73.9	49.6	50.5	50.6	49.6	164	191	217	445	462	600	600	600	600	586	553	501	397	494	445	600	549	595	7.35755	7.57743	7.76155	8.79766	8.85175	9.22882	9.22882	9.22882	9.22882	9.19476	9.11114	8.96867	8.633
708_m4	13.2	23.9	29.8	38.4	40.8	44.4	47.3	49.6	52.8	54.1	56.1	59.6	60.4	60.4	61.3	64.1	64.5	67	175	269	227	182	176	211	220	119	150	232	211	260	239	111	220	335	213	301	7.45121	8.07146	7.82655	7.50779	7.45943	7.7211	7.78136	6.89482	7.22882	7.85798	7.7211	8.02237	7.90087
709_m5	12.3	25.1	34.9	45.9	49.7	53.2	56.3	58.3	61.2	61.5	57.1	58.5	57.9	60	60.8	60.6	58.7	52.3	154	207	253	373	302	475	445	458	460	373	491	463	472	575	531	600	600	507	7.26679	7.69349	7.98299	8.54303	8.2384	8.89178	8.79766	8.8392	8.84549	8.54303	8.93958	8.85487	8.88264
710_m1	15.6	28.3	35.8	41.2	44	46.1	47.7	51	52.5	54.7	57.8	61.6	63.5	65.9	68.4	69.5	70.7	72	163	174	182	192	217	193	165	242	319	391	460	418	449	559	516	539	600	598	7.34873	7.44294	7.50779	7.58496	7.76155	7.59246	7.36632	7.91886	8.31741	8.61102	8.84549	8.70736	8.81057
711_m2	16.3	30.4	37.3	46.1	47	47.8	45.2												198	259	254	493	566	600	600												7.62936	8.01681	7.98868	8.94544	9.14466	9.22882	9.22882
712_m3	13.3	25.9	33.7	42.2	46.2	49.6	52	55.6	57.7	59.9	62.2	65.3	56.9	69.7	72.1	74.6	75	77	146	256	232	194	196	184	173	157	192	318	319	317	398	388	372	252	257	297	7.18982	8	7.85798	7.59991	7.61471	7.52356	7.43463	7.29462	7.58496	8.31288	8.31741	8.30834	8.63662
713_m4	12.8	26.7	35.9	45.9	48.6	51.7	52.6	54.1	55.1	54	55.4	56.8	56.2	56.5	57.1	58	57.1	55.9	145	221	218	304	339	534	498	572	600	600	600	600	530	490	470	460	510	550	7.17991	7.7879	7.76818	8.24793	8.40514	9.0607	8.96	9.15987	9.22882	9.22882	9.22882	9.22882	9.04985
714_m5	13.5	25.4	35.3	45.3	49.2	52.9													169	276	263	452	600	600													7.40088	8.10852	8.03892	8.82018	9.22882	9.22882
715_m6	11.1	21.5	29.8	37.1	40.1	43.2	45.6	47.9	50.2	52.1	54.1	55.9	56.8	54.9	55.8	54.7	54.2	52.1	138	249	223	286	271	259	299	334	527	452	498	510	415	380	383	302	396	600	7.10852	7.96	7.8009	8.15987	8.08215	8.01681	8.224	8.3837	9.04166	8.82018	8.96	8.99435	8.69697
716_m1	14.7	26.7	34.2	40.9	44	47.5	48.6	52.5	55.8	58.6	60.7	65	64.9	63.6	60.7	65	63.4	63.3	175	238	360	195	199	296	192	319	376	462	469	444	274	75	122	273	165	108	7.45121	7.89482	8.49185	7.60733	7.63662	8.20945	7.58496	8.31741	8.55459	8.85175	8.87344	8.79442	8.09803
717_m2	11.2	23.3	32.8	38.9	41.3	42.9	44.3	46.4	48.3	48.9	50.1	52	53.2	52.5	53.3	54	53.9	54.4	137	252	206	328	414	461	510	505	600	600	600	559	600	585	600	600	600	600	7.09803	7.97728	7.6865	8.35755	8.69349	8.84862	8.99435	8.98014	9.22882	9.22882	9.22882	9.1267	9.22882
718_m3	10.1	21.3	30.4	38	40.6	43.1	43.3	45.6	46.3	47.6	48.1	48.4	47.6	49.1	48.6	48.3	47.7	48.9	127	235	261	373	403	593	554	583	600	569	581	582	520	555	555	600	600	600	6.98868	7.87652	8.02791	8.54303	8.65464	9.21189	9.11374	9.18735	9.22882	9.15228	9.18239	9.18488	9.02237
719_m4	11.7	22.6	31.5	40.7	45.6	49.5	41.8	55	58.1	61.3	63.6	63.4	62.8	60.6	65.6	70.7	76.2	79.4	131	182	255	226	194	226	219	277	296	411	349	239	269	187	224	238	233	178	7.03342	7.50779	7.99435	7.82018	7.59991	7.82018	7.77479	8.11374	8.20945	8.68299	8.44708	7.90087	8.07146
720_m5	11	23.5	33.5	41.6	44.5	47.6	46.8	48.6	50.2	51.8	52.2	53.9	53.3	54.4	55.3	54.4	55.6	55.9	162	188	232	204	379	506	499	528	445	539	489	539	558	583	516	548	600	600	7.33985	7.55459	7.85798	7.67243	8.56605	8.98299	8.9629	9.04439	8.79766	9.07414	8.93369	9.07414	9.12412
721_m1	8.5	17.7	26.4	37	41.5	45.1	47.5	50.9	52.9	56	59	62.5	63.8	65.7	68.5	70.1	71.3	72.7	100	190	196	226	233	154	174	176	175	161	221	301	288	273	207	204	183	167	6.64386	7.56986	7.61471	7.82018	7.86419	7.26679	7.44294	7.45943	7.45121	7.33092	7.7879	8.23362	8.16993
722_m2	10.1	20.1	28.1	38.3	41.9	46.9	48.2	50.8	53	55.3	57.7	60.6	63.1	66.1	67.6	69.1	70.9	72.6	141	203	275	204	210	174	180	149	229	240	228	244	373	390	276	312	236	207	7.13955	7.66534	8.10329	7.67243	7.71425	7.44294	7.49185	7.21917	7.8392	7.90689	7.83289	7.93074	8.54303
723_m3	9.4	19	26.2	35.6	39.7	43.9	45.9	49	51.1	52.9	55.3	58.1	58.9	60.6	63.7	65.8	66.8	67.7	147	184	186	234	213	147	175	190	223	277	273	337	319	298	472	404	307	290	7.19967	7.52356	7.53916	7.87036	7.73471	7.19967	7.45121	7.56986	7.8009	8.11374	8.09276	8.3966	8.31741
724_m4	12.1	19.9	27.3	37.2	40.3	44.1	47	50.8	53.2	57	60.6	64.8	65.8	68.6	72.1	74.1	74.8	76.3	131	187	216	226	154	211	259	249	251	341	361	497	391	374	397	480	562	481	7.03342	7.54689	7.75489	7.82018	7.26679	7.7211	8.01681	7.96	7.97154	8.41363	8.49586	8.9571	8.61102
725_m5	8.9	16.7	22.6	32.6	38.2	43.6	47.2	51.6	56.2	58.3	62.1	66.1	69.1	72.1	76.5	79.2	81.6	85	129	179	237	194	208	208	248	261	326	264	302	414	407	440	509	421	360	427	7.01123	7.48382	7.88874	7.59991	7.70044	7.70044	7.9542	8.02791	8.34873	8.04439	8.2384	8.69349	8.66888
726_m1	7.8	16.8	24.3	35.2	38.5	43.7	45.8	48.5	51.7	56	58	62.1	54	52.2	52.5	46.3			102	203	224	214	229	255	189	243	323	480	470	424	570	596	537	600			6.67243	7.66534	7.80735	7.74147	7.8392	7.99435	7.56224	7.92481	8.33539	8.90689	8.87652	8.72792	9.15482
727_m2	8.8	17.8	25.3	34.1	37.8	42.2	43.4	47.2	50.8	52.2	53.9	57	59.4	63.2	66.9	67.4	70.5	73.8	129	204	243	224	196	224	169	246	219	195	201	253	261	362	454	448	376	515	7.01123	7.67243	7.92481	7.80735	7.61471	7.80735	7.40088	7.94251	7.77479	7.60733	7.65105	7.98299	8.02791
728_m3	8.6	16.8	23.1	32.7	37.6	43	43.6	46.9	49.9	51.5	52.9	55.7	56.5	58.9	59.9	60.6	63	64.1	137	219	202	214	215	184	166	202	223	269	249	260	261	338	348	298	313	387	7.09803	7.77479	7.65821	7.74147	7.74819	7.52356	7.37504	7.65821	7.8009	8.07146	7.96	8.02237	8.02791
729_m4	7.6	16.6	24.4	33.9	44.1	48.7	47.7	52.9	58.3	62.6	66	69.9	67.2	70.9	71.8	72.4	75	77.8	130	246	260	214	223	335	190	229	218	323	431	490	130	393	152	265	128	240	7.02237	7.94251	8.02237	7.74147	7.8009	8.38802	7.56986	7.8392	7.76818	8.33539	8.75154	8.93664	7.02237
730_m5	8.6	16.9	24.2	33.6	38.8	44.4	46.7	51.1	54.5	56.5	58.4	61.1	63.1	65.5	68.1	68.1	69.7	72.1	137	231	282	151	177	423	256	301	478	537	471	439	476	464	470	292	351	522	7.09803	7.85175	8.13955	7.2384	7.46761	8.72451	8	8.23362	8.90087	9.06878	8.87958	8.77808	8.89482
# unit Blood glucose: mg/dL
# unit Body weight, fat mass and lean mass: grams
# unit Blood free carnitine: µmol/L
# unit Plasma insulin: µg/L
# unit Plasma cholesterol: mg/dL
# unit Plasma free fatty acids: mmol/L
# unit Pancreas Insulin: µg/µg
# unit liver weight: mg
# unit liver TG: µg/mg
[truncated: 133 more columns]

## Sheet: N2(NZOxC3H) females
Mouse ID	Body weight wk3	Body weight wk6	Body weight wk10	Body weight wk15	Body weight wk18	Body weight wk19	Body weight wk20	Body weight wk21	Blood glucose wk3	Blood glucose wk6	Blood glucose wk10	Blood glucose wk15	Blood glucose wk18	Blood glucose wk19	Blood glucose wk20	log2 Blood glucose wk3	log2 Blood glucose wk6	log2 Blood glucose wk10	log2 Blood glucose wk15	log2 Blood glucose wk18	log2 Blood glucose wk19	log2 Blood glucose wk20	Fat mass wk 3	Fat mass wk 6	Fat mass wk 10	Fat mass wk 15	Lean mass wk 3	Lean mass wk 6	Lean mass wk 10	Lean mass wk 15	rs3089881	rs3712347	rs3024048	rs3022821	rs3022828	rs3663366	rs3678662	rs3670558	rs3022854	rs3723307	rs3710476	rs4135996	rs3661740	rs3714595	rs3686811	rs3662211	rs4223557	rs3024096	rs3700620
																															1	1	1	1	1	1	1	1	1	2	2	2	2	2	2	2	2	2	3
																															0	14.2	21.68	28.49	33.36	36.18	41.07	45.55	57.53	0	9.1	19.94	28.91	32.03	34.97	41.91	46.34	62.63	0
81 f1	12.6	34.4	41.3	54.1	56.4	58.3	58.2	58.6	147	168	147	144	148	178	134	7.19967	7.39232	7.19967	7.16993	7.20945	7.47573	7.06609	2.4	13.44	18.43	27.34	10.88	20.01	22.15	24.6	H	H	H	H	H	H	H	H	H	H	H	H	H	H	H	H	H	H	H
82 f2	10.4	31.5	40.1	53.4	56	57.1	58	58.5	110	154	132	123	138	159	147	6.78136	7.26679	7.04439	6.94251	7.10852	7.31288	7.19967	1.98	11.73	17.63	26.58	9.38	18.83	22.05	24.64	A	A	A	A	A	A	A	A	A	H	H	H	H	H	H	H	H	H	H
83 f3	11	31.7	33.3	39.3	41.8	42	41.2	43.5	146	157	145	129	127	125	118	7.18982	7.29462	7.17991	7.01123	6.98868	6.96578	6.88264	1.99	11.03	11.17	16.14	9.74	19.53	20.64	21.28	H	H	H	H	H	H	H	H	H	A	A	A	A	A	A	A	A	A	A
84 f4	11.1	33.3	41.6	57.8	61.6	61.6	62.8	63.4	129	237	168	151	152	184	182	7.01123	7.88874	7.39232	7.2384	7.24793	7.52356	7.50779	1.86	13.34	19.63	30.55	9.96	18.77	21.42	24.9	A	A	A	A	A	A	A	A	A	H	H	H	H	H	H	H	H	A	A
91 f1	11.1	34	45.9	60.5	67.6	68.6	69.4	69.5	147	177	152	315	294	385	258	7.19967	7.46761	7.24793	8.29921	8.19967	8.58871	8.01123	1.93	12.11	20.21	29.77	9.26	20.81	25.17	28.24	A	A	A	A	H	H	H	H	H	H	H	H	H	H	H	H	H	H	A
92 f2	10.1	30.9	45	60.2	66.7	67	67.5	67.9	144	177	169	233	344	285	176	7.16993	7.46761	7.40088	7.86419	8.42626	8.15482	7.45943	2.03	10.44	19.85	30.43	8.28	19.13	24.08	27.28	H	H	H	A	A	A	A	A	A	H	H	H	H	H	H	H	H	A	H
93 f3	11.6	33	47.3	67	72.3	73.7	75.5	75.8	138	151	249	297	235	216	233	7.10852	7.2384	7.96	8.21432	7.87652	7.75489	7.86419	2.57	11.66	22.92	35.42	9.49	20.19	23.88	28.43	H	H	H	H	H	H	H	H	H	H	H	H	H	H	H	H	H	H	H
94 f4	11.6	31.6	43.7	60.4	67.1	68.4	70.3	72.5	114	232	172	201	202	173	188	6.83289	7.85798	7.42626	7.65105	7.65821	7.43463	7.55459	2.31	10.9	19.89	31.47	9.22	19.72	22.86	26.59	H	H	A	A	A	A	A	A	A	A	A	A	H	H	H	H	H	A	H
100 f1	13.4	34	51.4	64.1	70.6	72.9	75	75.8	171	185	212	229	257	237	340	7.41785	7.53138	7.72792	7.8392	8.00562	7.88874	8.40939	3.04	12.82	25.92	35.04	11.49	19.98	23.1	27.28	H	A	A	A	A	A	A	A	A	A	A	A	A	A	A	A	A	A	A
101 f2	13	36.8	53.8	64.9	67.2	68.7	69.1	70.3	130	169	197	144	138	151	177	7.02237	7.40088	7.62205	7.16993	7.10852	7.2384	7.46761	3.04	15.39	26.99	35.9	10.84	19.85	23.34	27.2	A	A	A	A	A	A	H	H	H	H	H	H	H	H	H	H	A	A	H
102 f3	12	37.1	56	70.4	77.7	79.3	79	81.6	135	164	218	366	400	348	399	7.07682	7.35755	7.76818	8.5157	8.64386	8.44294	8.64024	2.7	13.87	27.77	38.03	10.27	22.07	26.13	30.27	H	H	H	A	A	A	A	A	A	A	A	H	H	H	H	H	H	H	A
103 f4	12.8	33.8	50.3	64.3	71.8	75	76.9	77.4	125	172	290	335	322	324	476	6.96578	7.42626	8.17991	8.38802	8.33092	8.33985	8.89482	2.75	11.88	22.09	34.25	10.59	20.74	24.14	27.9	A	A	A	A	A	H	H	H	H	A	A	A	A	A	A	A	A	A	H
104 f5	13.1	35.4	49.8	60.6	63.6	64.4	65.9	66.1	137	142	193	238	184	187	298	7.09803	7.14975	7.59246	7.89482	7.52356	7.54689	8.21917	2.56	11.72	22.88	30.57	10.7	22.03	24.33	27.91	A	A	A	A	A	A	A	A	H	A	A	A	A	A	A	A	A	A	A
115 f1	9.7	28.1	40.8	54.3	60	62.5	65.1	64.4	106	233	140	134	129	147	145	6.72792	7.86419	7.12928	7.06609	7.01123	7.19967	7.17991	1.47	8.4	18	26.67	9.01	18.89	23.2	26.12	A	A	A	A	A	A	A	A	A	A	H	H	H	H	H	H	H	H	A
116 f2	8.8	29.8	40.9	54.3	58.6	59.4	60.2	61	115	207	200	174	176	154	135	6.84549	7.69349	7.64386	7.44294	7.45943	7.26679	7.07682	1.34	10.02	17.67	28.45	8.82	18.41	21.42	24.54	H	H	H	H	A	A	A	A	A	H	H	H	H	H	H	H	H	H	H
117 f3	7.5	24.2	33.1	45.3	47.6	48.7	49.8	50.6	100	143	173	164	120	154	164	6.64386	7.15987	7.43463	7.35755	6.90689	7.26679	7.35755	1.23	6.51	12.3	20.04	7.35	16.72	20.48	23.06	A	A	A	A	A	A	A	A	A	A	A	A	H	H	H	A	A	A	A
118 f4	11.5	28.7	31.2	41	43.7	45.3	45.4	46.4	110	184	163	165	130	163	118	6.78136	7.52356	7.34873	7.36632	7.02237	7.34873	6.88264	2.03	10.11	10.26	17.68	10.04	17.46	20.4	22.1	H	H	H	H	H	H	H	H	H	A	A	A	A	A	A	A	A	A	H
119 f5	8.7	26.3	36.7	52	58.4	60.8	60.9	61.3	86	196	172	171	127	178	132	6.42626	7.61471	7.42626	7.41785	6.98868	7.47573	7.04439	1.6	6.57	12.99	24.71	8.59	18.89	22.51	25.99	A	A	A	A	A	A	A	A	A	H	A	A	A	A	A	A	A	A	A
120 f1	9	31.1	37	47.9	49	51.7	52.4	56.1	101	194	150	181	119	151	133	6.65821	7.59991	7.22882	7.49985	6.89482	7.2384	7.05528	1.43	10.81	15.13	24.42	8.67	19.2	20.51	21.68	H	H	H	H	H	H	H	H	A	H	H	H	H	H	H	H	H	H	A
121 f2	9.6	26.5	34.6	44.1	47.7	48.7	48	50.5	102	171	162	136	142	159	148	6.67243	7.41785	7.33985	7.08746	7.14975	7.31288	7.20945	1.34	6.22	11.97	19.13	8.99	19	21.37	23.07	H	H	H	H	H	H	H	H	H	H	H	H	H	A	A	A	A	A	H
122 f3	6.2	27.3	36.3	48.9	52.3	53.7	54.4	55.1	74	189	154	112	138	183	125	6.20945	7.56224	7.26679	6.80735	7.10852	7.5157	6.96578	0.94	8.08	13.33	22.32	6.09	18.24	21.47	24.09	A	A	A	A	A	H	H	H	H	H	H	A	A	A	A	A	A	A	H
123 f4	6.3	25.4	31.8	45.9	51.9	53.1	53.9	55	71	166	168	144	125	179	187	6.14975	7.37504	7.39232	7.16993	6.96578	7.48382	7.54689	0.89	6.26	10.19	20.52	6.29	17.99	20.53	23.67	H	H	A	A	A	A	A	A	A	A	A	A	A	A	A	A	A	A	A
124 f5	6.3	24.3	31.9	40	42.8	43.5	43.8	45.8	62	199	169	171	142	138	148	5.9542	7.63662	7.40088	7.41785	7.14975	7.10852	7.20945	1.02	6.24	11.37	17.07	6.82	17.14	19.87	21.15	H	A	A	A	A	A	A	A	A	A	A	A	H	H	H	H	H	H	A
125 f6	7.7	25.7	29.1	33.4	37	36.1	35.8	38.2	84	177	163	120	121	125	109	6.39232	7.46761	7.34873	6.90689	6.91886	6.96578	6.76818	1.28	7.21	7.73	10.15	7.39	17.36	19.63	20.97	H	H	H	H	A	A	A	A	A	A	A	A	A	A	A	A	A	A	H
139 f2	11.5	30.9	42.8	51.3	50.3	49.1	50.5	47.9	153	254	240	466	449	443	451	7.25739	7.98868	7.90689	8.86419	8.81057	8.79116	8.81698	1.76	9.83	17.14	23.41	10.15	20.48	23.89	25.01	H	A	A	A	A	A	A	A	A	A	A	A	A	A	A	A	H	H	H
140 f3	12	31.9	42.1	57.3	62.2	63.8	65.9	66.5	153	172	118	242	177	201	267	7.25739	7.42626	6.88264	7.91886	7.46761	7.65105	8.0607	2.29	12.31	19.17	29.75	10.36	19.77	22.13	25.3	A	A	A	A	A	A	A	A	A	H	H	H	H	H	A	A	A	A	H
146 f1	7.3	25.9	37.9	35.7	38.3	38.4	39.9	39.9	108	193	131	145	168	143	132	6.75489	7.59246	7.03342	7.17991	7.39232	7.15987	7.04439	1.42	9.18	9.97	14.21	7.06	16.86	25.11	19.99	A	A	A	A	A	A	A	A	A	H		H	H	H	H	H	A	A	A
147 f2	9.9	25.1	42.8	40.7	44.4	43.9	44.6	45.9	142	138	114	129	135	126	142	7.14975	7.10852	6.83289	7.01123	7.07682	6.97728	7.14975	1.62	7.13	9.39	15.91	9.23	18.12	30.47	23.02	A	A	A	A	H	H	H	H	H	H	H	H	A	A	A	A	A	H	H
148 f3	8.1	25.3	27.5	33	35	35.8	36.5	36.3	121	186	142	147	127	138	120	6.91886	7.53916	7.14975	7.19967	6.98868	7.10852	6.90689	1.22	6.92	6.41	10.28	7.75	18.1	19.81	20.5	H	H	H	A	A	A	A	A	A	A	A	A	H	H	H	H	H		A
150 f5	8.9	24.8	28.7	41	46.1	47	48.6	50.2	138	219	146	167	151	154	149	7.10852	7.77479	7.18982	7.3837	7.2384	7.26679	7.21917	1.46	7.12	5.37	14.98	8.04	16.98	20.46	23.53	A	A	A	A	A	A	A	A	A	H	H	H	H	H	H	H	H	H	A
158 f1	15	33	42.2	53.1	56.5	56.3	58.8	59.7	194	162	137	148	151	131	134	7.59991	7.33985	7.09803	7.20945	7.2384	7.03342	7.06609	2.17	9.37	17.54	25.83	12.2	22.33	23.7	25.3	A	H	H	H	H	H	H	H	H	H	H	H	H	H	H	H	H	H	A
159 f2	14.8	31.2	42.2	49	51.8	53.5	54.4	54.3	211	223	176	153	149	147	133	7.7211	7.8009	7.45943	7.25739	7.21917	7.19967	7.05528	2.17	10.57	19.54	24.12	11.88	19.57	20.9	22.93	A	A	H	H	H	H	H	H	H	H	H	H	H	H	H	A	A	A	H
160 f3	15.3	33.6	43	55	58	58.2	61.2	62.7	156	145	161	172	142	130	119	7.2854	7.17991	7.33092	7.42626	7.14975	7.02237	6.89482	2.21	12.33	19.47	28.65	12.3	20.22	21.76	24.1	H	H	H	H	H	H	H	H	H	A	A	A	A	A	A	H	H	H	A
161 f4	12.5	33	45.1	63.9	71.4	73.5	76.2	77.1	155	228	154	162	154	175	135	7.27612	7.83289	7.26679	7.33985	7.26679	7.45121	7.07682	2.2	12.1	22.55	37.6	9.9	19.42	20.86	24.74	H	H	H	H	H	H	A	A	A	A	A	A	A	A	A	A	A	A	H
162 f5	11.3	31	44.5	53.8	59.8	61.1	62.9	63.1	132	187	149	152	138	133	139	7.04439	7.54689	7.21917	7.24793	7.10852	7.05528	7.11894	1.51	9.6	20.24	28.21	9.66	20.02	22.91	23.41	A	A	A	A	A	A	A	A	A	H	H	H	H	H	H	H	H	H	A
167 f1	13.5	26.3	35.1	50.1	53.6	54.2	55.6	54.8	182	217	162	195	178	144	151	7.50779	7.76155	7.33985	7.60733	7.47573	7.16993	7.2384	1.84	7.61	13.18	23.96	11.25	17.51	20.2	23.86	H	H	H	H	H	H	H	H	A	H	H	A	A	A	A	A	A	A	H
168 f2	11.5	26.6	36.8	47.4	49.3	51.2	53.3	52.9	135	200	189	181	137	190	148	7.07682	7.64386	7.56224	7.49985	7.09803	7.56986	7.20945	1.61	7.53	19.03	23.08	9.41	18.02	19.74	22.79	A	A	A	A	A	A	A	A	A	H	H	H	H	H	H	H	A	A	A
169 f3	14	30.1	36.7	43	44.5	44	46.4	48.8	210	231	229	136	167	185	152	7.71425	7.85175	7.8392	7.08746	7.3837	7.53138	7.24793	1.79	9.07	14.21	20.14	11.63	19.77	21.07	21.38	H	H	H	H	H	H	H	H	H	H	A	A	A	A	A	A	A	H	H
170 f4	14.4	33.3	45.1	58.6	62.4	63.8	64.6	64.6	151	234	200	210	250	320	188	7.2384	7.87036	7.64386	7.71425	7.96578	8.32193	7.55459	2.02	12.23	21.16	30.49	11.74	20.12	22.98	26.52	A	A	A	A	A	A	A	A	A	H	A	A	A	A	A	A	A	A	H
171 f5	9.8	29.2	40.1	57.2	62.6	64.3	67.2	64.9	127	196	212	179	178	226	276	6.98868	7.61471	7.72792	7.48382	7.47573	7.82018	8.10852	1.38	10.55	18.92	31.58	8.31	17.58	19.71	23.95	A	H	H	H	H		H	H	H	A	A	A	A	A	A	A	A	H	H
176 f1	11.4	28.6	37.4	48.6	50.7	51.3	51	52.6	126	170	276	158	147	116	110	6.97728	7.40939	8.10852	7.30378	7.19967	6.85798	6.78136	1.5	8.42	15.63	23.83	9.63	19.07	20.68	23.03	H	H	H	H	H	H	H	H	A	H	A	A	A	A	A	A	A	A	A
177 f2	10.7	29.9	40.9	50.4	54	55.5	56.4	57	131	181	234	191	147	154	141	7.03342	7.49985	7.87036	7.57743	7.19967	7.26679	7.13955	1.52	9.19	17.01	24.43	8.78	19.49	22.24	23.75	A	A	A	A	A	A	A	A	A	A	A	A	A	A	A	A	A	A	H
178 f3	7.9	27	38.4	46.1	48.6	48.6	50.1	51.3	70	155	171	153	130	132	124	6.12928	7.27612	7.41785	7.25739	7.02237	7.04439	6.9542	0.69	7.79	16.23	21.8	7.34	18.16	20.93	22.34	A	A	A	A	A	A	A	A	A	H	H	H	H	H	H	H	H	H	A
179 f4	10.3	31.3	50.1	65.1	70.7	73	74	74.6	92	182	193	210	198	217	150	6.52356	7.50779	7.59246	7.71425	7.62936	7.76155	7.22882	1.29	9.8	23.62	33.58	8.96	20.41	25.17	28.95	A	H	H	H	H	H	H	H	H	H	H	H	H	H	H	H	H	H	H
180 f5	10.8	30.8	44.9	62.4	67.5	68.6	69.3	69.6	114	156	174	346	274	334	308	6.83289	7.2854	7.44294	8.43463	8.09803	8.3837	8.26679	1.52	8.76	19.75	33.18	9.08	20.47	23.2	26.94	H	H	H	H	H	H	H	H	H	H	H	H	H	A	A	A	A	A	A
185 f1	7.8	27.7	41.9	50.2	50.7	53.5	55.3	54.2	95	210	197	182	393	149	141	6.56986	7.71425	7.62205	7.50779	8.61839	7.21917	7.13955	0.62	6.96	16.76	23.14	7.37	19.01	23.42	24.94	A	A	A	A	A	A	H	H	H	A	A	A	A	A	A	A	A	A	A
186 f2	7	28	39.6	51	54.8	57.6	58.4	58.9	110	177	183	233	285	336	307	6.78136	7.46761	7.5157	7.86419	8.15482	8.39232	8.26209	0.59	8.67	16.39	24.19	6.41	17.77	22.05	24.63	H	A	A	A	H	H	H	H	H	H	H	H	H	H	H	A	A	A	H
187 f3	10.7	23.4	34.8	46	48.3	51.4	51.3	50.9	168	203	163	196	124	188	149	7.39232	7.66534	7.34873	7.61471	6.9542	7.55459	7.21917	1.76	6.49	14.01	22.86	8.63	15.57	18.95	21.18	H	H	H	H	H	H	H	H	H	H	H	H	H	H	H	H	H	H	H
188 f4	8.8	27.1	38	46.6	47	49.1	51.3	51.8	114	198	271	188	146	144	142	6.83289	7.62936	8.08215	7.55459	7.18982	7.16993	7.14975	1	8.06	15.82	22.84	7.71	17.31	20.99	21.85	A	A	A	A	A	A	A	A	A	H	H	H	H	H	H	H	H	H	A
193 f1	10.7	32.5	49	61.4	65.9	68.1	70.4	70.5	111	227	188	220	179	187	192	6.79442	7.82655	7.55459	7.78136	7.48382	7.54689	7.58496	1.72	11.45	24.25	33.29	8.91	19.55	22.63	25.82	H	H	A	A	A	A	A	A	A	A	A	A	H	H	H	H	H	H	H
194 f2	10.5	28.3	43.4	56.7	61.5	65.7	68.5	69.7	115	174	189	160	160	168	143	6.84549	7.44294	7.56224	7.32193	7.32193	7.39232	7.15987	1.36	7.56	18.22	28.67	8.89	19.55	23.39	25.64	A	H	H	H	H	H	H	H	A	H	H	H	H	H	H	H	H	H	H
195 f3	9.2	27.3	40.5	53.9	59.3	60.7	62.4	64	99	182	174	162	120	159	152	6.62936	7.50779	7.44294	7.33985	6.90689	7.31288	7.24793	1.15	8.38	18.45	30.29	7.95	17.75	20.41	22.41	H	H	H		H	H	H	H	H	A	A	A	H	H	H	H	H	H	H
196 f4	8.2	27.4	39.1	47.2	50.5	51.8	53.5	53	97	189	169	133	136	167	143	6.59991	7.56224	7.40088	7.05528	7.08746	7.3837	7.15987	0.75	7.87	15.06	21.04	7.51	18.42	22.41	23.84	A	A	A	A	A	A	A	A	A	A	A	A	A	A	A	A	A	A	H
197 f5	9	27.7	38.3	45.5	47.6	49	50.5	50.4	112	165	200	143	112	126	117	6.80735	7.36632	7.64386	7.15987	6.80735	6.97728	6.87036	0.85	7.31	15.18	21.12	8.01	19.14	21.16	22.72	A	A	A	A	A	A	A	H	H	H	H	H	H	H	H	H	H	H	A
202 f1	13	34.4	49.4	58.4	61.8	62.6	63.7	63.8	177	149	168	136	159	163	154	7.46761	7.21917	7.39232	7.08746	7.31288	7.34873	7.26679	2.37	11.7	24.64	30.42	11.1	19.99	23.76	26.03	A	A	A	A	A	A	A	A	A	H		H	H	H	H	H	H	H	H
203 f2	15.2	33.6	53.3	72.6	79.9	82.2	85.2	84.7	165	191	172	194	233	239	208	7.36632	7.57743	7.42626	7.59991	7.86419	7.90087	7.70044	4.05	9.49	25.25	39.58	11.93	21.9	26.02	30.44	H	H	H	H	H	H	H	H	H	H	H	A	A	A	A	A	A	A	A
204 f3	13	31.1	45.7	59.5	65.5	67.6	68.2	67	147	130	250	152	248	192	293	7.19967	7.02237	7.96578	7.24793	7.9542	7.58496	8.19476	2.53	8.32	19.78	29.91	11.16	19.81	23.78	27.94	H	A	A	A	A	A	A	A	A	A	H	H	H	H	H	H	H	H	A
205 f4	10.9	30.6	45.1	56.6	61.5	61.6	62.3	61.6	151	184	176	176	183	176	160	7.2384	7.52356	7.45943	7.45943	7.5157	7.45943	7.32193	1.73	9.67	21.35	30.18	10.15	19.34	22.26	24.75	A	A	H	H	H	H	H	H	H	A	A	A	A	A	A	A	A	H	H
206 f5	10.9	30.8	48.1	60.8	67	69.9	72.7	73.4	183	191	195	167	233	241	309	7.5157	7.57743	7.60733	7.3837	7.86419	7.91289	8.27146	2.11	11.15	24.66	32.94	9.75	17.47	22.62	26.21	A	A	A	A	A	A	H	H	H	A	H	H	H	H	H	H	H	H	H
212 f1	12	26	33.8	47.8	49.4	53.3	54.2	53.5	153	137	138	126	127	151	146	7.25739	7.09803	7.10852	6.97728	6.98868	7.2384	7.18982	1.95	5.68	10.13	20.25	10.34	18.48	22.35	25.27	H	A	A	A	A	A	A	A	A	H	H	H	H	H	H	A	A	A	H
213 f2	10.8	25.4	34	42.1	44.2	44.7	46.7	45.3	119	179	181	167	152	135	136	6.89482	7.48382	7.49985	7.3837	7.24793	7.07682	7.08746	1.69	6.08	12.19	18.55	9.42	17.8	20.46	21.68	H	H	H	H	H	H	H	H	H	A	A	A	A	A	H	H	H	H	A
214 f3	10.4	27.7	43.8	54.6	62.2	65.2	66.5	66	147	143	164	168	221	236	233	7.19967	7.15987	7.35755	7.39232	7.7879	7.88264	7.86419	2.03	7.95	19.09	27.64	9.52	17.56	21.74	25.02	A	H	H	H	H	H	H	H	H	H	H	A	A	A	A	A	A	A	A
215 f4	12.6	31.2	51.3	66.5	73	75.1	78	77.5	190	151	206	192	262	270	323	7.56986	7.2384	7.6865	7.58496	8.03342	8.07682	8.33539	2.12	8.55	23.09	35.48	10.69	21.04	25.59	29.4	A	A	A	A	A	A	A	A	A	A	A	A	A	A	A	A	A	A	H
216 f5	9.9	24.9	34.2	41.7	45.9	46.3	48.6	47.4	154	148	248	159	132	161	122	7.26679	7.20945	7.9542	7.31288	7.04439	7.33092	6.93074	1.5	6.4	12.59	18.82	9	16.3	19.92	20.84	A	A	A	A	A	A	A	A	A	H	H	H	H	H	H	H	A	A	H
222 f1	12	29	38.2	47.7	53.8	56.4	57.5	58.6	140	172	195	209	199	164	198	7.12928	7.42626	7.60733	7.70736	7.63662	7.35755	7.62936	2.26	9.72	15.45	21.95	10.74	17.98	21.01	24.07	H	H	H	H	H	H	H	H	H	A	A	A	A	A	A	A	A	A	A
223 f2	11.5	29.4	41.9	53.8	58.5	60.1	62	62	98	146	160	172	133	159	199	6.61471	7.18982	7.32193	7.42626	7.05528	7.31288	7.63662	2.47	8.44	18.24	25.71	9.89	19.27	22.68	26.01	H	H	H	H	H	H	H	H	H	H	H	H	H	H	H	H	H	A	H
224 f3	12.6	30.9	40.7	49.1	54.3	56.1	58.1	57.9	159	173	183	185	144	135	165	7.31288	7.43463	7.5157	7.53138	7.16993	7.07682	7.36632	2.51	10.77	17.38	23.29	11.41	18.84	21.55	24.46	A	H	H	H	H	H	H	H	H	A	A	A	A	A	A	A	A	A	A
225 f4	11.9	28.9	40.3	50	56.3	58.7	60.8	60	173	181	181	162	176	191	199	7.43463	7.49985	7.49985	7.33985	7.45943	7.57743	7.63662	2.03	7.42	16.94	23.66	10.99	19.51	21.95	24.63	A	A	A	A	A	A	A	A	A	A	A	A	A	A	A	A	A	H	A
226 f5	11.6	31.3	45.5	61.6	69.7	71.5	73.6	74.5	134	171	159	158	186	206	245	7.06609	7.41785	7.31288	7.30378	7.53916	7.6865	7.93664	2.24	10.41	22.67	34.93	10.07	18.16	21.89	25.17	H	H	H	H	H	H	H	H	H	H	H	H	H	H	H	H	H	H	H
227 f1	10.7	28	36.2	48.4	53.6	54.9	56.9	58.3	141	179	151	193	136	157	157	7.13955	7.48382	7.2384	7.59246	7.08746	7.29462	7.29462	1.32	8.59	13.58	22.9	9.11	17.98	20.72	24.09	A	A	H	H	H	H	H	H	H	A	A	A	A	A	H	H	H	H	H
228 f2	11	26.3	37.6	45.4	49.9	50.4	51.5	51.3	197	131	127	160	176	161	127	7.62205	7.03342	6.98868	7.32193	7.45943	7.33092	6.98868	1.27	7.46	15.53	21.34	9.55	17.82	20.15	22.46	H	A	A	A	A	A	A	A	A	A	A	A	A	A	H	H	H	A	A
229 f3	10.3	28.9	42.9	54.1	57.8	58.2	61.4	60.3	139	197	127	144	158	148	134	7.11894	7.62205	6.98868	7.16993	7.30378	7.20945	7.06609	1.23	8.39	16.93	26.82	8.66	19.04	23.6	24.94	H	H	H	H	H	H	H	H	H	H	H	A	A	A	A	A	A	A	A
230 f4	13.9	30.7	44.2	57.4	65.8	67.2	67.6	67.7	219	161	150	240	263	253	217	7.77479	7.33092	7.22882	7.90689	8.03892	7.98299	7.76155	2.32	9.4	18.65	28.63	10.79	19.71	23.13	26.66	A	A	A	A	H	H	H	H	A	A	A	A	A	A	A	A	A	H	H
231 f5	12.8	28.3	41.9	55.1	61.7	63.1	65.8	66.4	138	180	170	140	164	171	166	7.10852	7.49185	7.40939	7.12928	7.35755	7.41785	7.37504	1.93	7.78	16.26	26.22	10.37	19.16	23	26.85	A	A	A	A	A	A	A	A	A	H	H	H	H	H	H	H	H	H	H
238 f1	12	31.5	40.3	45.2	47.1	46.5	49.5	49.5	135	183	139	163	145	140	126	7.07682	7.5157	7.11894	7.34873	7.17991	7.12928	6.97728	1.47	11	16.54	19.65	10.38	18.6	21.3	23.43	H	H	H	A	A	A	A	A	H	H	H	H	H	H	H	H	H	H	H
239 f2	10.7	26.8	37.5	50.6	55.6	56	57.5	56.8	173	198	135	165	186	199	293	7.43463	7.62936	7.07682	7.36632	7.53916	7.63662	8.19476	1.2	7.75	15.56	25.95	9.29	17.59	19.95	23.1	A	H	H	H	H	H	H	H	A	H	H	H	H	H	H	H	H	A	H
240 f3	10.9	30.8	53.8	65.2	71.1	71.7	72.4	72.9	145	171	193	413	394	382	422	7.17991	7.41785	7.59246	8.69	8.62205	8.57743	8.7211	1.42	9.47	26.45	35.91	9.13	19.48	24.87	27.16	A	A	A	H	H	H	H	H	H	A	A	A	A	H	H	H	H	H	A
241 f4	9.2	29	44.1	53.2	57.7	56.4	58.9	61.8	108	170	185	159	135	126	121	6.75489	7.40939	7.53138	7.31288	7.07682	6.97728	6.91886	0.89	8.65	20.29	28.09	8.2	18.19	21.8	23.89	A	H	H	H	H	H	H	H	H	H	H	H	H	H	H	H	H	H	A
242 f5	12.7	32.1	44	56.6	62.4	64.3	66.2	66.5	169	196	179	180	184	135	145	7.40088	7.61471	7.48382	7.49185	7.52356	7.07682	7.17991	2.36	11.82	20.67	30.72	10.22	18.45	21.3	23.93	H	H	H	H	H	H	H	H	H	H	H	H	H	H	H	H	H	H	H
243 f6	9.6	28	37.1	46.2	52.5	51.9	55.5	57.1	114	170	198	142	127	113	114	6.83289	7.40939	7.62936	7.14975	6.98868	6.82018	6.83289	0.82	8.19	14.46	22.17	8.44	18.57	20.78	22.41	H	H	H	A	A	A	A	A	A	H	H	H	H	H	H	H	H	H	H
250 f1	8.1	24.1	32.2	40.4	42.8	44.1	45.3	46.3	111	190	141	148	209	179	132	6.79442	7.56986	7.13955	7.20945	7.70736	7.48382	7.04439	0.7	6.59	12.34	18.57	7.19	16.19	18.21	20.17	A	A	A	A	A	A	A	A	A	H	H	H	H	H	H	H	H	H	H
251 f2	12.3	28.9	45.8	63.2	69.7	72.7	75.8	76.8	141	230	160	182	213	207	228	7.13955	7.84549	7.32193	7.50779	7.73471	7.69349	7.83289	1.69	9.33	22.42	35.04	10.21	18.01	21.83	26.15	H	H	H	A	A	A	A	A	A	H	H	H	H	H	H	H	H	H	A
252 f3	13.2	31.6	46.5	59.4	66.5	69.5	72.1	72.6	127	190	138	181	243	259	302	6.98868	7.56986	7.10852	7.49985	7.92481	8.01681	8.2384	2.33	9.34	19.06	29.27	10.65	20.76	25.61	27.88	H	H	H	H	H	H	H	H	H	A	A	A	A	A	A	A	A	A	H
253 f4	12.3	27.9	38.3	50.4	56.8	57.5	60.2	59.7	180	190	212	147	180	174	235	7.49185	7.56986	7.72792	7.19967	7.49185	7.44294	7.87652	1.75	7.57	15.33	24.85	10.17	19.03	21.41	23.72	H	H	H	H	A	A	A	A	A	H	H	H	H	H	H	H	H	H	A
254 f5	8.9	24.8	34.4	40.2	41.8	42.9	45.3	45.5	123	164	137	141	124	132	121	6.94251	7.35755	7.09803	7.13955	6.9542	7.04439	6.91886	0.82	6.06	11.37	14.89	7.89	17.36	21.12	23.49	H	H	H	H	H	H	H	H	H		A	A	A	A	A	A	A	A	H
255 f6	8.1	25.3	36.7	42.9	46	46	48.9	46	98	186	184	127	151	163	132	6.61471	7.53916	7.52356	6.98868	7.2384	7.34873	7.04439	0.56	6.33	13.32	18.97	7.38	17.6	21.39	22.66	H	H	H	H	H	H	H	H	H	A	A	A	A	A	A	A	H	H	A
262 f1	14.4	29.9	44.9	51.7	55.9	58.2	58.9	58.8	193	203	185	133	135	151	152	7.59246	7.66534	7.53138	7.05528	7.07682	7.2384	7.24793	2.83	9.27	21.1	26.33	11.12	20.05	22.19	23.49	A	A	A	A	A	A	A	A	A	A	A	A	H	H	H	H	H	H	A
263 f2	14.4	31.3	42.1	49.4	53.2	55.4	57.5	58.1	161	168	154	145	121	136	162	7.33092	7.39232	7.26679	7.17991	6.91886	7.08746	7.33985	2.01	9.96	18.88	24.73	11.56	19.2	21.8	22.75	A	A	A	A	A	A	A	A	H	H	A	A	A	A	A	A	A	A	H
264 f3	11.8	26.8	38	45.9	48.1	50.3	51.8	54.2	193	158	160	137	124	131	125	7.59246	7.30378	7.32193	7.09803	6.9542	7.03342	6.96578	1.57	7.57	15.19	21.22	9.87	18.37	21.64	22.45	H	H	H	H	H	H	H	H	H	A	A	A	A	A	A	A	H	H	A
265 f4	14.6	32.8	44.9	45.8	59.2	60.9	61.7	64.3	173	229	240	162	220	159	160	7.43463	7.8392	7.90689	7.33985	7.78136	7.31288	7.32193	2.24	11.12	20.66	28.3	11.91	20.07	23.34	24.81	A	A	A	A	A	A	A	A	A	H	H	H	H	H	H	H	H	H	H
266 f5	14.8	29.9	39.7	45.9	47.1	49.2	50.5	50.2	141	197	170	169	142	145	151	7.13955	7.62205	7.40939	7.40088	7.14975	7.17991	7.2384	2.46	8.92	16.21	21.74	11.85	19.45	21.73	22.23	H	H	H	H	H	H	H	H	H	H	H	H	A	A	A	A	A	A	H
273 f1	14.7	31.3	45.6	57.5	64.3	65.5	67.7	68.4	199	147	129	171	192	173	205	7.63662	7.19967	7.01123	7.41785	7.58496	7.43463	7.67948	2.69	10.4	21.72	31.06	11.6	19.81	22.59	24.52	H	H	H	H	H	H	H	H	H	H	H	H	H	H	H	H	H	H	H
274 f2	13.2	29	41.7	50.8	56.9	57.9	58.5	58.9	201	165	166	192	139	226	217	7.65105	7.36632	7.37504	7.58496	7.11894	7.82018	7.76155	1.12	8.68	17.63	24.51	11.67	19.46	22.56	24.27	H	H	H	H	H	H	H	H	A	A	A	A	H	H	H	H	A	A	H
275 f3	12	33.1	45.9	54.6	61.8	63.6	64.6	65	171	177	202	322	233	324	361	7.41785	7.46761	7.65821	8.33092	7.86419	8.33985	8.49586	1.56	10.14	19.58	25.23	9.97	20.64	24.98	26.58	A	A	A	A	H	H	H	H	H	A	A	A	A	A	A	A	A	H	A
276 f4	15.4	33.2	44.4	53.6	58.8	60.8	63.2	61	181	192	137	152	141	137	126	7.49985	7.58496	7.09803	7.24793	7.13955	7.09803	6.97728	2.9	11.42	20.13	27.18	11.79	20.77	22.84	24.48	H	H	H	H	H	H	H	H	A	A	A	A	A	H	H	H	H	H	H
282 f1	15.6	28.9	40.7	53.7	58.6	59.8	60.5	62	161	148	209	156	148	180	173	7.33092	7.20945	7.70736	7.2854	7.20945	7.49185	7.43463	2.15	8.13	17.13	25.86	12.74	19.52	22.46	25.24	H	H	H	H	H	H	H	H	H	A	A	A	A	A	A	H	H	A	A
283 f2	12.4	32.8	48.1	57.2	61.4	63.1	64.4	62.4	190	169	146	178	151	224	209	7.56986	7.40088	7.18982	7.47573	7.2384	7.80735	7.70736	1.85	10.46	21.38	28.2	10.09	20.83	25.11	26.31	A	A	A	A	A	A	A	H	H	A	A	A	A	A	A	A	A	A	A
284 f3	15.9	30.5	41.1	49.2	51.4	53.2	52.5	54.6	167	176	200	179	143	157	147	7.3837	7.45943	7.64386	7.48382	7.15987	7.29462	7.19967	2	10.92	19.43	26.03	13.5	19.15	20.84	21.33	H	H	H	H	H	H	H	H	H	H	H	H	H	H	H	H	H	A	A
285 f4	14.8	33.3	48.7	59.7	60.5	60.7	62	62.5	155	188	240	256	192	197	286	7.27612	7.55459	7.90689	8	7.58496	7.62205	8.15987	3.46	12.1	23.35	30.41	12.44	21.28	23.44	25.75	A	A	A	A	A	A	A	A	A	H	H	H	H	A	A	A	A	A	H
290 f1	19.8	38.3	53.5	67.2	71.3	73.3	74.7	74.9	195	191	161	314	322	369	368	7.60733	7.57743	7.33092	8.29462	8.33092	8.52748	8.52356	2.32	13.84	24.21	33.93	15.54	24.48	26.99	29.36	H	H	H	H	H	H	H	H	H	H	H	A	A		A	A	A	A	H
291 f2	15.6	32.5	43.8	51.6	54.3	54.5	57.4	58.5	197	185	154	139	111	144	140	7.62205	7.53138	7.26679	7.11894	6.79442	7.16993	7.12928	2.12	11.4	19.71	26.09	12.51	20.58	22.09	22.76	A	A	A	A	A	A	A	A	H	H	H	H	H	H	H	H	H	H	A
292 f3	16.9	37.3	51.5	62.7	68.4	70.5	72.8	72.6	199	145	169	244	302	269	227	7.63662	7.17991	7.40088	7.93074	8.2384	8.07146	7.82655	2.87	14.37	24.6	32.22	13.01	22.7	25.43	27.01	A	A	A	A	A	A	A	A	A	A	A	A	A	A	A	A	A	A	A
293 f4	17.4	32.3	41.2	45.3	47.3	46.6	47.3	47.2	161	157	209	120	124	154	135	7.33092	7.29462	7.70736	6.90689	6.9542	7.26679	7.07682	2.08	10.99	17.7	19.57	13.74	20.35	21.87	21.75	A	A	A	A	A	A	A	A	H	H	A	A	A	A	A	A	A	H	A
300 f1	17.3	32.3	47.6	60.7	66	67.6	69.9	69.1	204	155	158	153	191	179	241	7.67243	7.27612	7.30378	7.25739	7.57743	7.48382	7.91289	2.9	8.98	20.05	30.2	13.22	21.36	24.96	26.95	A	A	A	A	A	A	A	A	A	H	H	H	H	H	H	H	H	H	H
301 f2	15.1	34.9	53.8	68.3	75.5	76.4	78.3	76.8	157	162	210	360	424	213	307	7.29462	7.33985	7.71425	8.49185	8.72792	7.73471	8.26209	2.43	12.76	25.42	36.83	11.66	21.9	26.49	29.07	H	H	H	H	H	H	A	A	A	A	A	A	H	H	H	H	H	H	A
302 f3	15.4	36.2	49.7	63.4	68.9	69.2	71	69.7	220	204	175	251	310	253	259	7.78136	7.67243	7.45121	7.97154	8.27612	7.98299	8.01681	2.33	12.94	22.26	32.51	12.21	22.11	25.39	27.22	A	A	A	A	A	A	A	A	A	A	A	A	A	A	A	A	A	A	A
303 f4	13.8	31.5	43.8	55.3	60.7	62.5	64.6	64.2	220	184	169	136	143	133	137	7.78136	7.52356	7.40088	7.08746	7.15987	7.05528	7.09803	1.56	10.06	19.07	28.21	11.35	20.58	22.81	23.71	A	A	A	A	A	A	A	A	A	H	H	H	H	H	A	A	A	A	H
310 f1	13.5	31.9	43	49.5	53.1	55	56.8	57.4	212	123	242	151	133	172	134	7.72792	6.94251	7.91886	7.2384	7.05528	7.42626	7.06609	1.74	10.37	19.05	24.19	11.16	20.54	22.21	24.4	A	A	A	A	A	A	A	A	A	H	H	A	A	A	A	A	A	A	A
311 f2	12.8	29.2	41.8	46	47.9	48.1	48.8	48.2	170	160	162	121	131	126	164	7.40939	7.32193	7.33985	6.91886	7.03342	6.97728	7.35755	1.36	7.62	16.46	19.52	10.75	20.51	23.15	23.11	A	A	A	A	A	A	A	A	H	A	A	A	A	A	A	A	A	A	A
312 f3	12	29.7	42.4	51.6	57	57	58.7	58.9	164	209	222	150	194	193	176	7.35755	7.70736	7.79442	7.22882	7.59991	7.59246	7.45943	1.34	9.79	18.37	25.02	10.14	19.27	22.36	24.25	H	A	A	A	A	A	A	A	H	H	H	H	H	H	H	H	H	A	H
313 f4	14.4	32.5	47.3	55.4	62.4	63.3	63.6	63.6	124	174	239	163	254	185	156	6.9542	7.44294	7.90087	7.34873	7.98868	7.53138	7.2854	1.88	9.12	20.85	27.77	11.84	21.69	24.58	26.94	H	H	H	H	H	H	H	H	H	A	A	A	A	A	A	A	A	A	A
314 f5	12.7	28.4	44.3	51.8	56.2	56.9	57.3	56.8	220	158	217	127	197	150	191	7.78136	7.30378	7.76155	6.98868	7.62205	7.22882	7.57743	1.68	7.69	18.82	24.19	10.3	20.01	23.9	25.73	A	A	A	A	A	A	H	H	H	A	A	A	H	H	H	H	H	H	H
321 f1	19.6	40.8	55.1	66.4	70.3	71.1	72.4	72.6	212	170	196	168	150	180	163	7.72792	7.40939	7.61471	7.39232	7.22882	7.49185	7.34873	5.09	17.12	28.14	37.04	15.02	21.72	24.84	27.45	A	A	A	A	A	A	A	A	A	A	A	A	A	A	A	A	A	A	A
322 f2	17.5	35	48.4	57.7	67.9	45.2	63.8	64.6	179	211	184	170	270	162	173	7.48382	7.7211	7.52356	7.40939	8.07682	7.33985	7.43463	4.24	13.04	23.48	31.36	13.35	20.73	22.49	24.71	A	A	A	A	A	A	A	A	A	A	A		A	A	A	A	A	A	A
323 f3	17.8	35.2	49.3	63.4	68.2	68.6	69.6	70.2	173	161	260	235	301	227	259	7.43463	7.33092	8.02237	7.87652	8.23362	7.82655	8.01681	4.98	13.74	23.76	34.48	13.85	19.59	23.62	26.6	A	A	A	A	A	A	A	A	A	A	A	A	A	A	A	A	A	A	A
324 f4	20.2	37.8	49.8	58.8	64.3	66	66.8	67.3	182	149	150	171	163	199	161	7.50779	7.21917	7.22882	7.41785	7.34873	7.63662	7.33092	5.21	14.79	23.8	29.54	15.56	20.63	23.75	26.99	A	A	A	A	A	A	A	A	A	A	A	A	A	A	A	A	A	A	A
325 f5	16.6	31.8	40.9	44.9	45.2	45.2	46.2	46.7	181	200	174	153	138	163	191	7.49985	7.64386	7.44294	7.25739	7.10852	7.34873	7.57743	3.84	10.89	18.12	21.27	13.28	18.7	20.24	21.38	A	A	A	A	A	A	A	A	A	A	A	H	H	H	H	H	H	H	H
330 f1	16.4	32.4	43.1	53.3	58.4	59.4	61.6	63.3	154	207	162	140	140	154	189	7.26679	7.69349	7.33985	7.12928	7.12928	7.26679	7.56224	4.09	11.27	20.72	28.13	12.82	19.32	21.17	23.23	A	A	A	A	H	H	H	H	H	H	H	H	H	H	H	H	H	H	A
331 f2	16.7	30	47.8	64.5	70.7	73	74.7	76.5	178	156	214	156	200	198	223	7.47573	7.2854	7.74147	7.2854	7.64386	7.62936	7.8009	3.53	8.5	22.4	34.18	14.06	20.89	24.94	28.29	H	A	A	A	A	A	A	A	H	H	H	H	H	H	H	H	H	H	H
332 f3	18.8	38.1	53.3	67.6	71.9	72.4	73.6	75.5	185	174	193	278	230	277	289	7.53138	7.44294	7.59246	8.11894	7.84549	8.11374	8.17493	5	15.16	28.15	38.08	14.65	21.36	24.6	27.27	A	A	A	A	A	A	A	A	A	A	A	A	A	A	A	A	A	A	A
333 f4	18.6	38.7	49.1	58.3	63.1	64.7	64.5	65.2	191	326	219	196	202	173	228	7.57743	8.34873	7.77479	7.61471	7.65821	7.43463	7.83289	4.92	15.16	23.58	29.9	14.61	21.91	24.03	26.27	A	A	A	A	A	A	A	A	A	A	A	A	A	A	A	A	A	A	A
334 f5	17	34.8	49.1	60.3	64.4	65.9	68.3	70	172	185	211	181	187	170	202	7.42626	7.53138	7.7211	7.49985	7.54689	7.40939	7.65821	4.38	13.48	24.46	33.02	13.45	20.33	23.08	25.33	A	A	A	A	A	A	A	A	A	A	A	A	A	A	A	A	A	A	A
339 f1	17	35.9	49.6	62.3	66.7	67.1	67.1	65.6	154	168	184	138	178	173	183	7.26679	7.39232	7.52356	7.10852	7.47573	7.43463	7.5157	4.21	12.23	23.09	33.37	13.5	21	25.05	26.8	A	A	A	A	A	A	A	A	A	A	A	A	A	A	A	A	A	A	A
340 f2	14.8	27.4	49	47.9	52.4	53	54.9	53.9	134	158	178	155	163	151	176	7.06609	7.30378	7.47573	7.27612	7.34873	7.2384	7.45943	3.16	7.27	14.21	23.23	12.39	19.67	21.5	22.68	H	H	H	H	H	H	A	A	A	H	H	H	A	A	A	A	A	A	A
341 f3	13.1	30.5	45.7	55.3	59.6	60.5	61.6	61.2	159	217	166	139	145	163	170	7.31288	7.76155	7.37504	7.11894	7.17991	7.34873	7.40939	3.31	9.77	21.84	29.01	10.67	19.42	22.01	24.32	A	A	A	A	A	A	A	A	A	A	A	A	A	A	A	A	A	A	A
342 f4	16.1	31.4	41.6	45.9	48.8	47.9	48.5	47.4	154	156	159	130	117	143	148	7.26679	7.2854	7.31288	7.02237	6.87036	7.15987	7.20945	3.67	10.48	19.24	23.63	12.78	18.91	20.64	20.34	H	A	A	A	A	A	A	H	H	A	A	A	H	H	H	H	H	H	H
343 f5	18.4	35.6	49	59.8	64	64.8	65.7	66.9	185	173	228	177	141	151	170	7.53138	7.43463	7.83289	7.46761	7.13955	7.2384	7.40939	4.87	12.36	22.57	31.11	14.31	21.25	24.07	26.51	A	A	A	A	A	A	A	A	A	A	A	A	A	A	A	A	A	A	A
344 f6	12.8	27.8	39.7	44.2	48.9	48.2	48.6	48.5	153	189	186	172	150	141	176	7.25739	7.56224	7.53916	7.42626	7.22882	7.13955	7.45943	3.06	8.03	18.53	22.83	10.23	17.5	20.01	19.84	A	A	A	A	A	A	A	A	A	A	A	A	A	A	A	A	A	A	A
348 f1	18.8	39.4	56.9	67.8	71.8	72.4	74.8	75.8	171	178	250	286	283	243	257	7.41785	7.47573	7.96578	8.15987	8.14466	7.92481	8.00562	4.02	14.57	28.52	37.44	14.36	23.04	26.61	28.41	H	A	A	A	A	A	A	A	A	H	H	H	H	H	H	H	H	H	A
349 f2	19.3	38.4	51.6	67.6	62.4	63.2	64.7	65.3	195	168	204	236	220	203	175	7.60733	7.39232	7.67243	7.88264	7.78136	7.66534	7.45121	3.67	13.74	24.46	31.12	15.16	23.41	24.9	27.39	H	H	H	H	H	H	H	H	H	H	H	H	H	H	H	H	H	H	H
350 f3	16.8	34.8	53.5	68.7	76.8	77.6	79.6	81	168	195	150	184	200	200	193	7.39232	7.60733	7.22882	7.52356	7.64386	7.64386	7.59246	3.19	11.75	25.37	38.43	13.29	21.85	25.69	28.01	H	H	H	H	A	A	A	A	A	A	A	A	A	A	A	H	H	H	H
351 f4	17.5	37.4	54.5	67.3	72.3	72.8	75.5	76.4	224	176	295	281	309	284	294	7.80735	7.45943	8.20457	8.13443	8.27146	8.14975	8.19967	3.56	13.04	25.5	35.95	13.73	22.66	27.09	29.87	A	A	A	A	A	A	A	A	A	H	H	H	H	H	H	H	H	H	H
352 f5	16.4	35	48.8	55.4	61	60.7	62.9	64.3	173	165	176	139	156	135	128	7.43463	7.36632	7.45943	7.11894	7.2854	7.07682	7	3.14	13.54	23.86	30.58	13.1	20.3	22.83	23.27	A	A	A	A	A	A	A	A	H	H	H	H	H	H	H	H	H	H	H
353 f6	18	32.2	43.3	49.2	50.8	50.5	50.9	50.1	160	141	154	137	153	131	114	7.32193	7.13955	7.26679	7.09803	7.25739	7.03342	6.83289	3.02	11.7	20.34	25.97	14.66	19.3	21.1	21.54	H	H	H	H	H	H	H	H	H	H	H	H	H	H	H	H	H	H	A
359 f1	15.2	27.2	37.8	41.4	43.8	43.1	43.9	44.3	178	159	156	140	123	136	149	7.47573	7.31288	7.2854	7.12928	6.94251	7.08746	7.21917	2	5.23	13.75	16.57	13.05	19.79	22.52	23.02	H	H	H	H	H	H	H	H	H	H	H	H	A	A	A	A	A	A	H
360 f2	16.3	31.2	37.6	44.1	44.4	44.6	55.8	45.7	165	193	169	135	164	144	122	7.36632	7.59246	7.40088	7.07682	7.35755	7.16993	6.93074	3.05	10.77	16.28	21.4	12.84	19.09	20.09	20.99	H	H	H	H	H	H	H	H	H	H	H	H	H	H	H	H	H	H	H
361 f3	16.5	31.6	38.8	45.5	48.8	50.2	51	52.4	193	198	184	163	154	150	126	7.59246	7.62936	7.52356	7.34873	7.26679	7.22882	6.97728	3.32	9.65	15.77	21.85	12.82	21.13	21.69	22.18	H	H	H	H	H	H	H	H	H	H	H	H	H	H	H	H	H	H	A
362 f4	16.2	32.3	43.2	46.1	49.1	49.3	51.6	52.6	177	202	198	128	147	180	155	7.46761	7.65821	7.62936	7	7.19967	7.49185	7.27612	2.75	10.24	19.05	22	13.18	21.58	23.07	22.79	A	A	A	A	A	A	A	A	A	A	A	A	A	A	A	A	A	A	A
363 f5	15.7	27	34.2	37.5	40.5	40.5	40.5	40.3	202	168	184	149	195	181	122	7.65821	7.39232	7.52356	7.21917	7.60733	7.49985	6.93074	2.04	6.91	11.59	14.03	13.38	18.89	21.12	21.64	A	A	A	A	A	A	A	A	A	H	H	H	H	A	A	A	A	A	A
364 f6	16.9	34.1	41.6	46.7	48.5	49.7	50.6	53.2	206	203	193	177	154	129	135	7.6865	7.66534	7.59246	7.46761	7.26679	7.01123	7.07682	3.23	10.38	17.23	21.8	13.33	21.78	23.04	23.33	H	H	H	H	H	H	H	H	H	A	A	H	H	H	H	H	H	H	A
370 f1	15.6	36.5	53	67.9	74.5	76	78.4	79.4	167	153	177	175	184	209	140	7.3837	7.25739	7.46761	7.45121	7.52356	7.70736	7.12928	2.74	12.23	25.45	36.31	12.64	22.19	25.89	29.09	H	H	H	H	H	H	H	H	H	H	H	H	H	H	H	A	A	A	H
371 f2	15.6	36.1	44.6	56	57.8	58.9	59.4	61.1	143	149	186	142	173	191	127	7.15987	7.21917	7.53916	7.14975	7.43463	7.57743	6.98868	2.49	9.19	19.75	28.42	12.9	21.71	23.45	25.83	H	H	H	H	H	H	H	H	H	H	H	H	H	H	H	H	A	A	A
372 f3	15.6	32.9	46.8	52.7	56.4	57	57.4	57.8	162	202	158	208	183	239	121	7.33985	7.65821	7.30378	7.70044	7.5157	7.90087	6.91886	2.45	9.97	21.09	26.3	12.21	21.8	24.09	24.31	H	H	A	A	A	A	A	A	A	A	H	H	H	H	H	H	H	H	A
373 f4	13.3	27.9	37.3	41.6	41.9	41.4	41.3	42.3	163	247	164	143	143	133	108	7.34873	7.94837	7.35755	7.15987	7.15987	7.05528	6.75489	1.6	6.89	15.04	18.79	11.55	19.2	21.11	20.84	A	A	A	A	A	A	A	A	H	A	A	A	A	A	A	A	A	A	A
374 f5	12.8	28.6	38.6	49.2	54.7	55.9	56.2	58.3	195	178	176	147	167	186	136	7.60733	7.47573	7.45943	7.19967	7.3837	7.53916	7.08746	1.71	7.34	15.17	25.19	10.93	20	21.53	22.72	A	H	H	H	H	H	H	H	H	A	A	A	A	H	H	H	H	H	A
379 f1	12.5	30.4	43.5	56.4	59.8	60.8	63.9	65.5	148	147	178	181	153	162	125	7.20945	7.19967	7.47573	7.49985	7.25739	7.33985	6.96578	1.88	8.14	19.58	28.67	10.44	20.37	22.52	25.36	H	H	H		H		H			A	A	A	A	A	A	A	A	A	A
380 f2	12.6	32.4	44.8	53.2	54.8	56.4	58.1	58.5	128	175	158	146	144	162	149	7	7.45121	7.30378	7.18982	7.16993	7.33985	7.21917	1.65	9.92	20.25	25.67	10.71	20.83	23.01	25.62	H	H	H	H	H		H			A	A	H	H	H	H	H	H	H	A
381 f3	11.6	29.4	40	48.9	51.4	52	54.6	53.7	136	215	261	201	242	195	171	7.08746	7.74819	8.02791	7.65105	7.91886	7.60733	7.41785	1.42	7.86	17.29	24.16	10.04	20.31	21.13	23.53	A	H	A	A	A	A	A	A	H	H	H	H	H	H	H	H	H	H	A
382 f4	13	29.7	37.3	45.2	49.2	50.7	52.8	56	193	160	194	149	170	194	247	7.59246	7.32193	7.59991	7.21917	7.40939	7.59991	7.94837	2.02	8.41	16.54	22.14	10.78	18.85	19.98	20.71	H		H	H	H	H	H			A	A	A	A	A	A	A	H	H	A
383 f5	12.1	26.8	35	41.1	43.8	44.3	46	47	132	177	138	140	131	121	126	7.04439	7.46761	7.10852	7.12928	7.03342	6.91886	6.97728	1.54	6.96	14.74	20.75	10.43	18.44	18.91	19.14	A	H	A	H	H		H			H	H	A	A	A	A	H	H		A
384 f6	12.5	27.9	36	41.5	42.5	43.8	44.5	44.2	137	158	172	132	122	153	120	7.09803	7.30378	7.42626	7.04439	6.93074	7.25739	6.90689	2.05	7.77	15.09	20.03	10.33	18.59	19.45	19.8	H	H	H		H		H			A	H	H	H	H	H	H	H	H	A
385 f7	12.4	29.4	37.8	48	53.6	54.6	57.3	47	189	163	250	161	177	157	170	7.56224	7.34873	7.96578	7.33092	7.46761	7.29462	7.40939	2.1	10.29	18.06	27.94	10.19	17.48	18.19	19.4	A	A	A	A	A	A	A	H	H	H		H	H			H	H		H
394 f1	14.2	32.9	52	63	69.6	70.4	72.7	73.3	133	183	195	163	184	189	183	7.05528	7.5157	7.60733	7.34873	7.52356	7.56224	7.5157	4.14	11.29	25.86	35.32	9.82	20.72	23.86	26.29	H	H	H	H	H	H	H	H	H	H	H	H	H	H	H	H	H	H	H
395 f2	12.1	33.2	54.8	65	67.4	69.5	70.6	69.8	124	179	446	596	431	594	536	6.9542	7.48382	8.8009	9.21917	8.75154	9.21432	9.06609	2.47	10.66	28.29	37.47	9.43	21.34	24.58	25.39	A	A	A	A	A	A	A	A	A	H	A	A	A	A	A	A	A	H	A
396 f3	12.1	31.9	49.6	63.9	73	75	77.2	78.2	128	164	166	270	239	352	278	7	7.35755	7.37504	8.07682	7.90087	8.45943	8.11894	2.16	9.36	23.68	34.01	9.56	22.04	23.71	27.89	H	A	A	A	A	A	A	A	A	A	A	A	A	A	A	A	A	A	H
397 f4	13.6	20.6	43.6	51.4	56.8	56.3	57.8	58.5	143	210	219	142	222	247	195	7.15987	7.71425	7.77479	7.14975	7.79442	7.94837	7.60733	3.15	8.58	20.72	27.07	10.38	19.36	21.2	22.93	A	A	A	A	A	A	A	A	A	H		H	H			H	H		H
398 f5	13.2	27.9	39.8	49.1	55.1	57.7	59.5	61.6	134	151	166	158	150	181	154	7.06609	7.2384	7.37504	7.30378	7.22882	7.49985	7.26679	2.83	7.84	18.58	26.75	9.89	18.65	19.28	20.6	H	H	H	H	H	H	H	H	H	A	A	A	A	A	A	A	A	H	A
399 f6	15.1	29.3	38.9	47.6	55.7	56.9	58.7	60.8	147	151	161	171	157	179	148	7.19967	7.2384	7.33092	7.41785	7.29462	7.48382	7.20945	3.16	8.19	15.49	22.74	11.54	20.53	21.3	23.05	A	H	A	H	A	H	A	A	A	A	H	A	A	H	H	A	A	H	H
400 f1	14.3	35.3	62.5	82	89.8	91.6	93.1	88.6	160	166	176	204	184	145	191	7.32193	7.37504	7.45943	7.67243	7.52356	7.17991	7.57743	3.34	11.38	32.07	48.11	10.66	22.52	27.73	30.19	H	A	A	A	A	A	A	A	A	A	A	A	H	H	H	H	H	H	H
401 f2	12.2	28	44	57.5	65.3	67	70.3	71.7	146	204	165	339	431	383	366	7.18982	7.67243	7.36632	8.40514	8.75154	8.5812	8.5157	3.26	5.76	19.17	29.32	8.71	16.68	22.57	26.19	A	A	A	A	A	A	H	H	H	A	A	A	A	A	A	A	A	A	H
402 f3	13.2	31.5	48.5	59.2	63.8	65.3	66	67.2	110	161	168	186	239	231	180	6.78136	7.33092	7.39232	7.53916	7.90087	7.85175	7.49185	3.76	9.22	23.66	31.48	9.3	20.24	22.77	26.09	A	A	A	A	A	A	A	A	A	H	H	H	H	H	H	H	H	H	H
403 f4	12.2	31.5	48.6	54.8	58.8	59.2	61	62.7	140	177	210	185	222	170	200	7.12928	7.46761	7.71425	7.53138	7.79442	7.40939	7.64386	2.28	10.23	23.86	29.08	9.62	20.23	23.09	24.78	A	A	A	A	A	A	A	A	A	H	H	A	A	A	A	A	A	A	A
404 f5	10.8	23.4	33.7	42.1	46.7	47.3	48.6	49.3	178	182	152	147	150	135	137	7.47573	7.50779	7.24793	7.19967	7.22882	7.07682	7.09803	1.28	5.66	13.48	20.8	9.11	16.72	18.11	19.78	H		H		H		H		H	H		H	H	H	H	H	H	H	H
410 f1	12.8	35	47.9	55.7	58	59.8	60.4	61.3	155	214	231	128	155	166	131	7.27612	7.74147	7.85175	7	7.27612	7.37504	7.03342	2.08	13.3	23.4	29.03	11.04	20.08	22.69	24.18	H	H	H	H		H	H	H	H	H	H	H	H	H	H	H	H	H	H
411 f2	15.2	31.4	37.8	41.8	44	44.3	45.7	47.2	189	170	152	119	156	145	170	7.56224	7.40939	7.24793	6.89482	7.2854	7.17991	7.40939	3.39	9.23	13.65	16.88	12.36	21.31	21.77	22.35	H	H	H	H	H	H	H	H	H	H	H	H	A	A	A	A	A	A	H
412 f3	12	34.5	54.6	74.8	78.9	80.9	85.1	85.6	179	196	186	311	330	305	325	7.48382	7.61471	7.53916	8.28077	8.36632	8.25267	8.3443	2.2	12.71	28.75	43.14	10.37	19.89	23.71	27.98	A	A	H	H	H	H	H	H	H	H	H	H	H	H	A	A	A	A	A
413 f4	12.7	31.6	43.2	54.5	55	56.4	59.4	60.3	179	169	166	109	146	137	158	7.48382	7.40088	7.37504	6.76818	7.18982	7.09803	7.30378	2.4	9.26	16.81	25.42	10.79	20.7	24.05	26	H	H	H	H	H	A	A	A	A	H	H	H	A	A	A	A	A	A	H
414 f5	12.1	29.4	36.8	44.5	47.5	48	51.9	51.2	159	130	176	120	135	134	134	7.31288	7.02237	7.45943	6.90689	7.07682	7.06609	7.06609	2.21	8.6	12.11	18.48	10.27	20.13	22.38	23.86	H	H	H	H	H	H	H	A	A	H	H	H	H	H	H	H	H	H	H
419 f1	12.2	34.2	47.1	58.7	61	62.9	63.3	62.1	137	200	174	154	152	162	142	7.09803	7.64386	7.44294	7.26679	7.24793	7.33985	7.14975	2.5	11.97	21.69	29.99	10.43	20.15	23.4	25.96	H	H	H	H	H	H	H	H	H	H	H	H	H	H	H	H	H	H	A
420 f2	14.6	34.8	51.7	69.1	79	82.8	85.5	85.7	160	149	178	336	328	311	404	7.32193	7.21917	7.47573	8.39232	8.35755	8.28077	8.65821	3.97	11.01	23.65	36.48	12.01	21.09	25.65	28.78	A	A	A	A	A	A	A	A	A	H	H	H	H	H	H	H	H	H	H
421 f3	12.1	30.9	45.6	54.6	56.7	59.5	60.4	59.9	150	229	146	163	193	171	153	7.22882	7.8392	7.18982	7.34873	7.59246	7.41785	7.25739	1.95	8.81	20.31	28.02	10.99	20.21	23.36	23.76	H	A	A	A	A	A	A	A	A	A	A	H	H	H	H	H	H	H	A
422 f4	12.4	35.2	53.7	67.3	70.6	71.4	72.5	72.5	135	149	176	152	169	166	138	7.07682	7.21917	7.45943	7.24793	7.40088	7.37504	7.10852	2.44	12.15	26.66	37.16	10.91	20.85	25.1	27.81	A	A	A	A	A	A	A	A	A	A	A	A	H	H	H	H	H	H	A
423 f5	11.4	29.2	46.3	61.4	63	65	66.2	65.2	158	224	179	144	235	182	219	7.30378	7.80735	7.48382	7.16993	7.87652	7.50779	7.77479	1.97	8.41	21.01	32.73	9.67	18.59	23.18	25.71	A	A	A	A	A	A	A	A	H	H	H	H	H	H	H	H	H	H	A
424 f6	9	28	37.8	45	49.7	53.8	55.7	56.2	170	166	140	113	117	124	149	7.40939	7.37504	7.12928	6.82018	6.87036	6.9542	7.21917	1.26	7.3	14.35	20.8	8.23	18.88	21.21	21.9	A	A	A	A	A	A	A	A	A	H	A	A	A	A	A	A	A	A	H
429 f1	11.1	33.1	50.6	64.4	71.1	73.8	75	74.6	134	192	185	124	201	224	251	7.06609	7.58496	7.53138	6.9542	7.65105	7.80735	7.97154	2.14	10.29	23.11	32.54	9.87	21.72	25.96	29.31	A	A	A	A	A	A	A	A	A	A	A	A	A	A	A	A	A	A	A
430 f2	11.9	30.5	40.1	46.5	48.9	50	50.2	50.7	163	171	202	123	136	145	140	7.34873	7.41785	7.65821	6.94251	7.08746	7.17991	7.12928	2.21	8.15	17.09	21.76	10.16	20.37	21.35	22.92	H	H	H	H	H	H	H	H	A	H	H	H	H	H	H	H	H	A	H
431 f3	9.6	30.3	41.1	49.7	52.6	55.5	55.9	56	145	189	166	134	134	155	157	7.17991	7.56224	7.37504	7.06609	7.06609	7.27612	7.29462	1.49	10.24	17.98	24.45	8.6	19.09	21.66	22.95	A	A	A	A	A	H	H	A	A	A	A	A	A	A	A	A	A	A	H
432 f4	8.7	27	36.6	45.9	50.2	52.8	53.7	53.2	169	173	151	138	144	162	165	7.40088	7.43463	7.2384	7.10852	7.16993	7.33985	7.36632	1.1	8.2	15.75	22.68	8.45	17.2	19.13	21.17	H	H	H	H		H	H	H	H	H	H	H	A	A	A	A	A	A	H
433 f5	11.3	31	45	54.8	59.4	60.9	62	61.2	129	167	236	155	143	160	144	7.01123	7.3837	7.88264	7.27612	7.15987	7.32193	7.16993	2	9.24	20.64	28.47	9.37	19.46	22.62	23.93	H	H	A	A	A	A	A	A	A	H	H	H	H	H	H	H	H	A	A
437 f1	11.1	29	32.7	41.2	45.6	44.4	45	44.7	147	182	115	135	152	135	189	7.19967	7.50779	6.84549	7.07682	7.24793	7.07682	7.56224	1.83	7.25	8.16	13.71	9.89	20.64	22.09	24.59	A	A	A	A	A	A	A	A	A	H	H	H	H	H	H	H	H	H	A
438 f2	10.9	33.9	54.9	66	70.8	71	72.7	71.7	155	182	221	159	193	191	210	7.27612	7.50779	7.7879	7.31288	7.59246	7.57743	7.71425	1.87	10.65	26.14	33.32	10.04	21.4	26.54	29.93	A	A	A	A	A	A	A	A	A	A	A	H	H	H	H	H	H	H	H
439 f3	8.7	30.3	42	49.7	53.4	54.8	56.1	55.7	105	187	171	140	158	162	147	6.71425	7.54689	7.41785	7.12928	7.30378	7.33985	7.19967	1.25	9.2	17.32	23.18	8.51	19.39	22.41	24.38	H	H	H	H	H	H	H	H	H	A	A	A	A	H	H	H	H	H	A
440 f4	9	29.9	43.3	53.2	59.3	59.5	61.1	60.5	145	160	179	144	174	151	164	7.17991	7.32193	7.48382	7.16993	7.44294	7.2384	7.35755	1.44	9.24	19.64	26.55	8.82	18.52	21.69	24.12	H	H	H	H	H	H	H	H	H	H	H	H	A	A	A	A	A	A	H
441 f5	9.8	30.2	45.2	59.7	65.3	67.9	69.6	69.7	161	217	163	141	206	244	261	7.33092	7.76155	7.34873	7.13955	7.6865	7.93074	8.02791	1.81	9.78	19.69	30.27	9.11	18.87	23.77	27.29	H	H	H	H	H	H	H	H	H	A	H	H	H	H	H	H	H	H	A
442 f1	10.4	28.7	36.2	42.4	44.5	45.2	44.9	43.9	147	227	214	152	169	141	149	7.19967	7.82655	7.74147	7.24793	7.40088	7.13955	7.21917	1.42	9.04	14.99	18.67	8.37	18.89	19.75	21.59	H	H	H	H	H	H	H	H	H	H	H	H	H	H	H	H	H	H	A
443 f2	12	32.2	41.5	49.8	53.1	54.4	55.6	54.8	159	170	244	170	173	133	187	7.31288	7.40939	7.93074	7.40939	7.43463	7.05528	7.54689	2.17	10.74	17.46	22.79	9.33	20.44	22.04	24.62	A	H	H	H	H	H	H	H	H	A	A	A	A	A	A	A	A	A	H
444 f3	12.4	34.9	52	65.2	74	74.8	75.3	74	185	172	159	239	388	385	370	7.53138	7.42626	7.31288	7.90087	8.59991	8.58871	8.53138	2.31	12.25	25.72	35.35	9.87	21.53	24.36	28.08	H	H	H	H	H	H	H	H	A	H	H	H	H	H	H	H	H	H	A
445 f4	12.2	28.3	37.4	46	49.5	49.7	50.3	49.9	206	187	186	157	160	183	164	7.6865	7.54689	7.53916	7.29462	7.32193	7.5157	7.35755	1.85	7.71	14.14	19.61	9.9	19.56	21.68	23.99	H	H	H	A	A	A	A	A	A	H	H	H	H	H	H	H	H	H	A
451 f1	10.7	29.5	38.8	45.6	48.6	49.9	51.5	51.6	151	207	184	139	150	156	154	7.2384	7.69349	7.52356	7.11894	7.22882	7.2854	7.26679	1.26	8.68	15.98	20.93	9.03	19.75	21.13	23.13	H	H	H	H	H	H	H	H	H	A	A	A	A	A	A	A	A	H	A
452 f2	11.3	33.4	44.6	45.3	56.8	57.8	59.5	59.8	136	206	163	168	155	146	164	7.08746	7.6865	7.34873	7.39232	7.27612	7.18982	7.35755	1.25	11.62	20.44	26.18	9.57	21.31	22.59	25.81	H	H	H	H	H	H	H	H	H	H	H	H	H	H	H	H	H	H	A
453 f3	9.1	27.8	44.5	55.7	58.5	60	60.8	60.8	120	250	249	161	175	171	181	6.90689	7.96578	7.96	7.33092	7.45121	7.41785	7.49985	1.04	8.21	21.3	27.48	7.97	18.45	21.52	25.79	A	A	A	A	A	A	A	A	A	H	H	H	H	H	H	A	A	A	H
454 f4	11.7	34.4	49.8	62.1	68.3	70.3	72.3	71.2	137	176	258	232	261	231	269	7.09803	7.45943	8.01123	7.85798	8.02791	7.85175	8.07146	1.8	10.97	22.96	31.03	9.64	22.24	24.72	29.03	A	A	A	A	A	A	A	A	A	A	A	H	H	H	H	H	H	H	A
460 f1	15.3	29.6	38.5	46.9	49.6	49.7	50.2	49.4	175	225	202	196	182	156	165	7.45121	7.81378	7.65821	7.61471	7.50779	7.2854	7.36632	2.49	9.78	16.42	22.23	12.15	18.99	20.79	22.29	A	A	A	A	A	A	A	A	A	H	A	A	A	A	A	A	A	A	A
461 f2	16.1	29.2	41.3	52.3	56.2	57.9	58.4	59.1	149	198	150	160	206	183	177	7.21917	7.62936	7.22882	7.32193	7.6865	7.5157	7.46761	2.63	9.32	17.96	24.85	12.78	19.7	21.75	25.02	A	A	A	A	A	A	A	A	A		H	A	A	A	A	A	H	H	A
462 f3	15.1	30.9	42.6	48.2	52.1	52.7	53.2	53.2	202	211	184	148	150	154	158	7.65821	7.7211	7.52356	7.20945	7.22882	7.26679	7.30378	2.44	9.88	19.63	23.58	11.93	20.32	21.66	22.59	A	A	A	A	A	A	A	A	A	A	A	H	H	H	H	H	H	H	H
467 f1	10.4	26.5	36	42.1	46.4	47.1	48.6	48.5	158	152	193	151	157	125	119	7.30378	7.24793	7.59246	7.2384	7.29462	6.96578	6.89482	1.62	7	13.29	16.06	8.69	19.25	21.37	23.93	H	A	A	A	A	A	A	A	A	A	A	A	A	A	A	A	A	A	H
468 f2	11	28.2	42.6	55.1	61	63.2	65.2	65	176	169	182	147	226	167	182	7.45943	7.40088	7.50779	7.19967	7.82018	7.3837	7.50779	1.87	7.56	18.4	26.19	9.05	19.68	22.82	26.64	H	H	H	H	A	A	A	A	A	H	H	A	A	A	A	A	A	H	A
469 f3	9.6	26.1	36.1	45	48.6	49.9	51.9	52	132	171	182	147	161	125	173	7.04439	7.41785	7.50779	7.19967	7.33092	6.96578	7.43463	1.62	6.91	13.34	19	7.9	17.95	21.54	23.57	H	H	H	H	H	H	H	H	A	A	A	A	A	A	A	A	A	H	H
473 f1	19.9	39.2	52.7	57.8	65.6	66.8	67.3	69.8	206	159	171	147	159	149	154	7.6865	7.31288	7.41785	7.19967	7.31288	7.21917	7.26679	4.12	15.1	25.41	28.16	14.75	22.91	24.76	27.68	A	A	A	A	A	A	A	A	A	A	A	A	A	A	A	A	A	A	A
474 f2	21.5	42.6	57.3	66.1	68.9	71.8	73.2	73.4	169	213	158	139	170	173	220	7.40088	7.73471	7.30378	7.11894	7.40939	7.43463	7.78136	4.49	17.14	28.67	35.55	15.79	24.12	26.58	28.47	A	A	A	A	A	A	A	A	A	A	A	A	A	A	A	A	A	A	A
475 f3	17.5	35	46	52.3	55.7	56.2	56.2	56	199	177	154	161	216	196	239	7.63662	7.46761	7.26679	7.33092	7.75489	7.61471	7.90087	2.75	13.38	21.24	25.5	13.55	20.14	22.58	25.04	A	A	A	H	H	H	H	H	H	H	H	H	H	H	H	H	H	H	H
476 f4	21.6	38.2	47.3	51.6	56	57.6	57.7	59.2	206	180	181	162	129	135	157	7.6865	7.49185	7.49985	7.33985	7.01123	7.07682	7.29462	4.57	15.09	22.03	24.72	15.9	21.44	23.35	25.4	A	A	A	A	A	A	A	A	A	A	A	A	A	A	A	A	A	A	A
477 f5	20.9	36.7	49.9	55.9	60.1	61.2	61.5	62.9	198	156	221	140	134	145	134	7.62936	7.2854	7.7879	7.12928	7.06609	7.17991	7.06609	3.94	12.52	23	27.38	15.86	22.76	24.88	26.4	A	A	H	H	H	H	H	H	H	A	A	A	A	A	A	A	A	A	A
485 f1	17	37.1	53.6	68.4	75.3	77.7	77.7	78.9	176	215	256	379	380	363	312	7.45943	7.74819	8	8.56605	8.56986	8.50383	8.2854	2.59	13.34	25.85	37.73	13.61	22.29	25.47	28.4	H	A	A	A	A	A	A	A	H	A	A	A	A	A	A	A	A	H	A
486 f2	18.6	40.5	55.4	64.8	64.9	65.5	65.3	66.5	188	130	171	480	484	439	461	7.55459	7.02237	7.41785	8.90689	8.91886	8.77808	8.84862	2.84	15.83	25.46	34.7	14.8	23.24	27.21	27.88	A	A	A	A	A	A	H	H	H	H	H	H	H	H	H	H	H	H	A
487 f3	18.3	33.5	52	67.9	74.1	74.8	76.6	78.3	202	145	154	162	225	158	239	7.65821	7.17991	7.26679	7.33985	7.81378	7.30378	7.90087	3.05	11.71	25.98	39.02	14.39	20.48	23.75	27.53	A	A	A	A	A	A	A	A	A	H	H	H	H	H	H	H	H	A	H
488 f4	14.9	32	43.6	56.8	59.4	60.5	60	62	168	207	175	178	227	251	170	7.39232	7.69349	7.45121	7.47573	7.82655	7.97154	7.40939	2.22	10.25	18.65	27.93	12.18	20.5	22.75	26.62	H	H	H	H	H	H	H	H	H	A	A	H	H	H	H	H	H	H	H
496 f1	16.5	37.2	56.7	65.7	71.2	71.6	72.2	72.4	161	215	311	384	446	388	450	7.33092	7.74819	8.28077	8.58496	8.8009	8.59991	8.81378	2.49	14.25	27.82	35.14	13.25	21.45	25.56	27.84	A	H	H	H	H	H	H		H	H	H	H	H	H	H	H	H	H	A
497 f2	16.1	29	40.4	48.2	54.6	56.5	58.9	48.3	184	147	139	130	169	166	145	7.52356	7.19967	7.11894	7.02237	7.40088	7.37504	7.17991	2.78	8.54	16.18	21.58	12.61	19.4	22.25	24.3	H	H	A	A	A	A	A	A	A	A	A	A	A	A	A	A	A	A	H
498 f3	14.2	28.4	33.4	42.6	43.9	46.6	48	48.5	176	173	119	178	121	126	149	7.45943	7.43463	6.89482	7.47573	6.91886	6.97728	7.21917	1.61	6.14	8.49	15.61	12.02	20.95	22.85	24.83	H	H	H	H	H	H	A	A	A	H	A	A	A	A	A	A	A	A	A
499 f4	19	37.3	54	61.1	68.6	70	70.5	70.6	158	196	211	212	268	270	274	7.30378	7.61471	7.7211	7.72792	8.06609	8.07682	8.09803	2.92	13.44	25.46	30.2	15.06	22.76	26.69	28.62	A	H	H	H	H	H	H	H	H	H	H	H		A	A	A	A	A	A
507 f1	16	33.1	54.6	66.1	71.4	73.2	73.9	74.3	171	194	172	252	203	302	168	7.41785	7.59991	7.42626	7.97728	7.66534	8.2384	7.39232	2.6	11.07	26.41	35.27	13	20.8	26.25	28.65	A	H	H	H	H	H	H	H	H	H	H	H	H	H	H	H	H	H	H
508 f2	12.1	26.6	45	56.8	64	65.5	66.5	66.9	158	150	163	129	136	218	267	7.30378	7.22882	7.34873	7.01123	7.08746	7.76818	8.0607	1.32	6.43	19.45	28.47	10.43	18.96	23.36	26.4	A	A	A	A		A	A	H	H	A	A	A	A	A	A		A	A	H
509 f3	15.1	26.9	34.9	38.5	41	42	41.2	41.6	151	161	140	136	155	132	143	7.2384	7.33092	7.12928	7.08746	7.27612	7.04439	7.15987	1.67	6.71	11.52	14.16	12.97	20.76	21.53	22.3	H	H	H	H	H	A	A	A	A	H	A	A	A	A	A	H	H	A	A
517 f1	13.5	27.4	38.2	40.2	42.2	43	43.3	43.5	183	148	154	132	121	103	131	7.5157	7.20945	7.26679	7.04439	6.91886	6.6865	7.03342	1.61	7.15	13.99	15.44	11.63	19.16	21.92	22.38	H	H	H	H	H	H	H	H	H	A	A	A	A	A	A	A	A	A	A
518 f2	10.8	27.4	43.1	51.6	54.3	54.9	55.3	54.9	157	192	201	181	225	303	258	7.29462	7.58496	7.65105	7.49985	7.81378	8.24317	8.01123	1.23	8.45	18.51	24.62	9.36	18.01	22.68	24.57	H	A	A	A	A	A	A	A	H	A	A	A	H	H	H	H	H	H	H
519 f3	12.8	25.1	38.9	47.2	51.8	51.3	52.8	54.5	189	212	198	158	160	191	153	7.56224	7.72792	7.62936	7.30378	7.32193	7.57743	7.25739	1.55	7.96	17.42	24.19	10.95	16.43	19.6	21.14	H	A	A	A	A	A	A	A	A	H	A	A	A	A	A	A	A	A	H
520 f4	14.4	32.3	45.9	59.5	65.4	66.3	69.3	70.6	139	195	199	404	372	345	419	7.11894	7.60733	7.63662	8.65821	8.53916	8.43045	8.71081	2.34	11.59	19.65	30.3	11.76	19.56	24.18	26.67	H	H	H	A	A	A	A	A	A	A	A	A	A	A	A	A	H	H	H
528 f1	16.5	34	45.4	54.6	60.1	61.1	61.8	61.1	242	185	141	166	227	207	194	7.91886	7.53138	7.13955	7.37504	7.82655	7.69349	7.59991	3.83	12.37	20.54	26.32	12.38	21.55	23.59	26.29	H	A	A	A	A	A	H	H	H	A	A	A	A	H	H	H	H	H	H
529 f2	15.1	34.9	50.9	66.5	73	70.4			212	180	165	131	146	116		7.72792	7.49185	7.36632	7.03342	7.18982	6.85798		3.31	11.38	23.8	36.56	11.31	23.45	24.8	28.52	A	A	A	A	A	A	A	A	A	A	A	A	A	A	A	H	H	H	A
530 f3	14.9	35.7	51.7	60.9	65.5	67	69	68.3	212	147	143	176	157	136	188	7.72792	7.19967	7.15987	7.45943	7.29462	7.08746	7.55459	3.73	15.97	26.86	33.91	11.02	20.05	23.05	25.28	H	H	H	H	H	H	H	H	A	H	H	H	H	H	H	H	H	H	H
531 f4	12.3	31.4	50.1	64.9	75.1	77	78.1	76.9	209	203	142	140	260	305	242	7.70736	7.66534	7.14975	7.12928	8.02237	8.25267	7.91886	1.88	10.6	24.53	36.14	9.93	19.85	23.8	27.46	A	A	A	A	A	A	A	A	A	H		H	H	H	H	A	A	A	A
532 f5	11.8	30.8	46.2	56	59.2	60.1	61.3	61.2	193	167	123	175	125	103	124	7.59246	7.3837	6.94251	7.45121	6.96578	6.6865	6.9542	1.28	8.9	21.39	36.53	10.11	21.26	23.92	28.26	H	H	H	H	H		H	H	H	A	A	A	H	H	H	H	H	H	A
538 f1	11	27.1	36.6	43.9	47.3	49	50.9	52.2	174	258	159	166	158	145	173	7.44294	8.01123	7.31288	7.37504	7.30378	7.17991	7.43463	1.5	6.42	13.58	18.9	9.12	19.75	21.98	23.88	A	A	A	A	A	A	A	A	H	H	H	A	A	A	A	A	A	A	A
539 f2	13	35.1	51.8	63.3	67.2	69.9	72.9	74.3	171	176	175	203	184	285	246	7.41785	7.45943	7.45121	7.66534	7.52356	8.15482	7.94251	2.03	13.45	26.79	34.2	10.46	20.75	23.42	26.86	A	A	A	A	A	A	A	A	A	H	H	H	H	H	H	H	H	A	H
540 f3	12.3	33.1	52.5	67.1	74	77.5	80.6	80.7	163	151	129	139	134	180	175	7.34873	7.2384	7.01123	7.11894	7.06609	7.49185	7.45121	1.62	10.78	25.45	36.97	10.19	22.58	25.03	28.56	A	A	A	A	A	A	A	A	A	H	H	H	H	H	H	H	H	H	A
541 f4	12.6	30.8	47.2	59.2	63.9	64.2	66.7	68	155	182	157	166	129	132	169	7.27612	7.50779	7.29462	7.37504	7.01123	7.04439	7.40088	1.75	10.92	23.24	31.92	10.62	20.46	23.23	26.07	A	A	A	A	A	A	A	A	A	H	H	H	H	H	H	H	H	H	A
542 f5	12	29.2	43.9	51.4	53.9	55.4	56.9	57.3	162	216	144	156	137	155	176	7.33985	7.75489	7.16993	7.2854	7.09803	7.27612	7.45943	1.46	8.88	19.81	25.91	10.28	20.83	21.92	24.14	H	H	H	H	H	H	H	H	H	H	H	H	H	H	H	H	H	H	A
543 f6	11.4	29.7	47.5	58.4	62.3	64.8	66.5	65.7	182	236	200	360	172	339	386	7.50779	7.88264	7.64386	8.49185	7.42626	8.40514	8.59246		9.59	22.45	28.8		20.18	23.92	27.52	A	A	A	A	A	A	A	A	A	A	A	A	A	A	A	A	H	H	H
548 f1	12	29.7	43.3	53.8	62.2	63.8	65.3	67	176	170	161	158	166	180	159	7.45943	7.40939	7.33092	7.30378	7.37504	7.49185	7.31288	1.71	8.97	20.77	28.63	9.93	20.53	21.42	23.66	A	A	A	A	A	A	A	A	A	A	H	H	H	H	H	A	A	A	A
549 f2	11.7	27.3	39.5	50.2	55.5	55.6	56.3	56.7	156	138	158	138	187	128	144	7.2854	7.10852	7.30378	7.10852	7.54689	7	7.16993	1.74	6.66	15.48	23.31	9.66	19.98	22.69	25.34	H	H	H	A	A	A	A	A	H	A		H	H	H	H	H	H	A	A
550 f3	10	24	33	47.8	54.8	55.4	56.2	57.2	122	137	148	186	151	142	150	6.93074	7.09803	7.20945	7.53916	7.2384	7.14975	7.22882	1.4	4	9.7	20.14	8.38	18.7	22.33	26.1	A	A	A	A	A	A	A	A	A	H	H	A	A	A	A	A	A	A	H
551 f4	12.5	33	49.3	60.7	67.9	69.3	70.6	70.6	158	202	167	230	198	180	187	7.30378	7.65821	7.3837	7.84549	7.62936	7.49185	7.54689	1.8	9.58	20.28	29.22	10.39	23.13	26.17	29.12	A	A	A	A	A	A	A	A	A	A	A	A	A	A	A	A	A	A	A
552 f5	11.3	29.2	42.4	57.3	66.7	68.7	70	69.9	140	166	133	144	210	166	180	7.12928	7.37504	7.05528	7.16993	7.71425	7.37504	7.49185	1.07	6.85	18.12	28.95	9.83	20.62	23.26	26.8	H	H	H	A	A	A	A	A	H	H	A	A	A	A	A	A	A	A	H
558 f1	10.1	25.7	41.4	50.7	56.3	58.7	59.3	60.7	202	204	217	153	166	185	177	7.65821	7.67243	7.76155	7.25739	7.37504	7.53138	7.46761	1.19	7.87	16.98	24.26	8.72	17.73	21.82	25.02	H	H	H	H	H	H	H	H	H	H	H	H	H	H	H	H	H	A	H
559 f2 (f7)	12.3	30.7	47.4	59.7	66	68.1	69.7	69.3	137	174	128	180	176	197	167	7.09803	7.44294	7	7.49185	7.45943	7.62205	7.3837	1.83	10.66	24.34	32.22	10.12	19.79	22.39	26.89	A	A	A	A	A	A	A	A	A	H	H	H	H	H	H	H	H	H	H
560 f3	10.7	30.2	45.9	55.3	57.3	58.1	59	61.2	162	175	161	230	143	147	185	7.33985	7.45121	7.33092	7.84549	7.15987	7.19967	7.53138	1.4	10.59	20.29	26.83	9.16	19.44	23.83	26.86	H	H	H	H	H	H	H	H	H	A	H	H	H	H	H	H	A	A	H
562 f5	11.2	29.3	49	57.8	62	63.5	63.8	64	180	230	247	367	368	398	337	7.49185	7.84549	7.94837	8.51964	8.52356	8.63662	8.3966	1.38	9.31	23.34	29.22	9.43	20.02	23.85	27	H	H	H	H	H	H	H	H	H	A	A	A	H	H	H	H	H	H	A
567 f1	10.6	27.1	39.9	47.3	53.4	54.8	55.3	57.7	148	201	170	141	167	192	206	7.20945	7.65105	7.40939	7.13955	7.3837	7.58496	7.6865	1.07	8.27	18.76	22.94	9.31	18.49	19.88	21.97	A	A	A	A	A	A	A	A	A	H	H	H	H	H	H	H	H	H	A
568 f2	10.9	28.4	46.9	57.1	63.9	65.8	66.6	67.2	97	148	152	143	174	196	170	6.59991	7.20945	7.24793	7.15987	7.44294	7.61471	7.40939	1.54	8.7	22.54	28.71	9.22	19.47	23.2	26.59	A	A	A	A	A	A	H	H	H	H	H	H	H	A	A	A	A	A	H
569 f3	12.2	30.6	47.1	59.6	65	68.2	68.3	68.7	146	241	151	237	173	304	220	7.18982	7.91289	7.2384	7.88874	7.43463	8.24793	7.78136	1.23	8.25	20.79	29.18	10.68	22.4	24.89	28.5	H	H	H	H	H	H	A	A	A	A	A	A	A	A	A	H	H	H	A
570 f4	9.7	31	56.1	71.4	79.4	81.2	82	82.8	151	126	233	391	431	468	417	7.2384	6.97728	7.86419	8.61102	8.75154	8.87036	8.7039	1.15	9.06	28.64	40.91	8.48	21.69	25.9	29.81	H	H	H	H	H	H	H	A	A	A	A	A	A	A	A	A	A	A	A
571 f5	10	27.7	35.9	41.4	41.3	42.2	43.8	43	118	162	152	134	118	125	129	6.88264	7.33985	7.24793	7.06609	6.88264	6.96578	7.01123	0.89	8.5	14.59	18.64	8.78	18.97	20.21	21.42	A	A	H	H	H	H	H	H	H	A	A	A	A	A	A	A	A	A	A
575 f1	9	28	41.3	49	56.2	56	56.1	58.3	130	155	139	171	186	156	168	7.02237	7.27612	7.11894	7.41785	7.53916	7.2854	7.39232	0.83	8.01	18.37	24.15	8.17	19.62	21.96	24.74	A	A	A	A	A	A	A	A	A	H	A	A	A	A	A	A	A	A	H
576 f2	9.7	29.1	45	54.7	60.4	61.5	62.5	64.8	124	166	148	144	186	210	155	6.9542	7.37504	7.20945	7.16993	7.53916	7.71425	7.27612	0.84	11.25	22.86	29.36	8.78	18.11	22.21	24.77	H	H	H	H	H	H	H	H	H	A	A	A	A	A	A	A	A	A	H
578 f4	10.6	28	37.9	49.1	53.7	54.8	54.1	57.3	108	185	168	145	158	138	147	6.75489	7.53138	7.39232	7.17991	7.30378	7.10852	7.19967	0.84	8.94	14.65	22.47	8.04	19.48	21.59	24.3	A	A	A	A	A	A	A	A	A	A	A	A	A	A	A	A	A	A	H
583 f1	10	28.1	34.7	41	42.2	43.7	44.7	45.3	160	159	128	160	155	117	148	7.32193	7.31288	7	7.32193	7.27612	6.87036	7.20945	0.87	7.92	12.25	17.26	8.99	19.33	21.1	21.94	H	H	H	H	H	H	H	H	H	H	H	H	A	A	A	A	A	H	A
584 f2	8.1	26.8	40.3	50.3	54.4	57.3	59	60.4	149	184	198	176	163	100	166	7.21917	7.52356	7.62936	7.45943	7.34873	6.64386	7.37504	0.81	6.35	16.49	23.97	7.17	19.22	22.86	24.72	H	H	H	H	H	H	H	H	H	A	A	A	A	A	A	A	A	A	A
585 f3	11.5	35.4	46.1	54.9	57.6	59.2	60.9	61	175	132	173	170	264	343	260	7.45121	7.04439	7.43463	7.40939	8.04439	8.42206	8.02237	1.82	12.62	22	27.97	9.3	21.44	23.02	25.38	A	A	A	H	H	H	H	H	H	H	H	H	H	H	H	H	H	A	H
586 f4	8.2	26.4	37.4	49.5	52.9	54.6	56.4	57.7	119	153	143	169	177	200	215	6.89482	7.25739	7.15987	7.40088	7.46761	7.64386	7.74819	0.86	7.61	16.5	24.62	7.24	17.95	19.78	23.55	H	H	H	H	H	H	H	H	H	A	A	A	A	A	A	H	H	H	A
587 f5	11.2	33.2	45.4	58.9	63.2	65.1	68.3	69.1	153	159	159	167	143	162	248	7.25739	7.31288	7.31288	7.3837	7.15987	7.33985	7.9542	1.26	10.76	19.26	28.44	9.72	21.41	24.32	28.82	H	H	H	H	H	H	H	H	H	A	A	A	A	A	A	A	A	A	H
593 f1	13.6	33.7	44.3	48.4	53.2	54.1	55.9	57.6	162	168	146	121	140	132	142	7.33985	7.39232	7.18982	6.91886	7.12928	7.04439	7.14975	2.33	13.57	21.04	24.53	10.95	19.26	21.81	22.56	H	H	H	H	H	H	H	H	H	H	H	H	H	H	H	H	H	H	H
594 f2	12.7	30.3	47.9	56.4	62.6	62.5	66	62.2	174	162	193	235	349	459	328	7.44294	7.33985	7.59246	7.87652	8.44708	8.84235	8.35755	2.02	9.99	22.57	27.65	10.47	19.29	23.78	27.26	A	H	H	H	H	H	H	H	A	H	H	H	H	H	H	H	H	H	H
595 f3	12.1	30.3	48	59.2	65.7	66.3	65.1	71.1	173	176	222	227	164	141	216	7.43463	7.45943	7.79442	7.82655	7.35755	7.13955	7.75489	1.57	9.85	23.26	31.98	10.55	19.33	23.79	26.03	H	H	H	H	A	A	A	A	A	A	H	H	H	H	H	H	H	H	A
596 f4	11.6	32	47.6	57.3	63.6	65.1	65.1	64.9	178	187	191	218	311	250	233	7.47573	7.54689	7.57743	7.76818	8.28077	7.96578	7.86419	1.67	11.97	22.83	29.76	9.56	19.06	23.5	26.02	H	H	A	A	A	A	A	A	A	A	A	H	H	H	H	H	H	H	A
597 f5	12.6	26.2	35.9	42	41.5	42.7	43.4	44.2	201	144	166	174	138	141	130	7.65105	7.16993	7.37504	7.44294	7.10852	7.13955	7.02237	1.45	7.05	14.29	17.99	10.84	17.96	21.19	22.28	H	H	H	H	H	H	H	H	H	A	A	A	A	A	A	A	A	A	H
698 f6	10.1	29.2	40.3	50.1	55.2	55.5	56.9	59.7	182	135	164	162	141	128	126	7.50779	7.07682	7.35755	7.33985	7.13955	7	6.97728	1.15	8.56	18.34	25.8	8.79	19.34	21.06	23.07	H	H	H	A	A	A	A	A	A	A	A	A	A	A	A	A	A	H	A
604 f1	12.5	33.5	48.4	63	67.4	68.2	69.8	70.7	188	145	195	149	192	171	134	7.55459	7.17991	7.60733	7.21917	7.58496	7.41785	7.06609	1.7	10.95	23.42	33.36	10.37	21.38	24.57	27.97	A	H	H	H	H	H	H	H	H	A	A	H	H	H	H	H	H	H	H
605 f2	11.8	30.7	42.4	51.2	54.9	56.4	57.6	58.5	159	172	176	193	150	147	162	7.31288	7.42626	7.45943	7.59246	7.22882	7.19967	7.33985	1.8	11.01	20.35	26.91	9.79	18.76	21.4	22.77	A	A	A	A	A	A	A	A	A	H	H	H	H	H	H	H	H	H	A
606 f3	13.1	29	41.1	53.5	58.5	60.8	62.9	65.2	152	154	157	142	146	125	131	7.24793	7.26679	7.29462	7.14975	7.18982	6.96578	7.03342	2.19	9.7	18.8	28.35	10.5	18.53	21.12	23.82	A	A	H	H	H	H	H	H	H	H	H	H	H	H	H	H	H	A	H
607 f4	8.7	26.2	36.1	40.8	42.7	44.1	45.6	47.7	124	152	132	153	149	136	131	6.9542	7.24793	7.04439	7.25739	7.21917	7.08746	7.03342	1	7.12	14.34	16.89	7.73	18.13	21.01	22.12	H	H	H	H	H	H	H	A	A	H	H	A	A	A	A	A	A	A	H
608 f5	6.3	22.8	31.7	34.8	36.5	37	37.8	39.1	122	189	170	177	179	168	145	6.93074	7.56224	7.40939	7.46761	7.48382	7.39232	7.17991	0.25	5.61	12.02	14.06	6.07	16.54	18.53	19.01	H	H	H	H	H	H	H	H	H	A	A	A	A	A	A	A	A	A	A
613 f1	13.2	36.9	53.5	69.6	72.9	75	74.3	76.8	158	167	124	162	167	183	140	7.30378	7.3837	6.9542	7.33985	7.3837	7.5157	7.12928	2	11.18	22.55	33.71	10.49	24.24	28.42	30.85	H	H	H	H	H	H	H	H	H	H	A	A	A	A	A	A	A	A	A
614 f2	13.4	28.2	34.1	40.3		43.6	43.5	42.9	170	129	125	131	151	127	137	7.40939	7.01123	6.96578	7.03342	7.2384	6.98868	7.09803	1.72	8.77	12.52	16.33	11.14	18.16	20.55	21.68	H	H	H	H	H	H	H	H	H	H	H	H	H	H	H	H	H	H	A
615 f3	11.4	28.7	48.7	40.3	42.5	42.1	43.5	41.8	167	145	151	150	142	129	137	7.3837	7.17991	7.2384	7.22882	7.14975	7.01123		2.01	9.9	14.87	17.33	9.37	17.79	19.68	21.54	A	A	H	H	H	H	H	H	H	H	A	A	A	A	A	A	A	A	H
616 f4	10	32.8	48.5	60.8	66.7	68	43	68.5	176	177	137	181	279	183	115	7.45943	7.46761	7.09803	7.49985	8.12412	7.5157		1.1	11.2	22.43	30.96	8.6	20.45	23.91	27.24	A	A	A	A	A	A	A	A	A	A	A	A	A	A	A	A	A	A	A
617 f5	14.3	33.9	43.8	53.3	59.5	61.2	68	61.6	170	144	138	137	146	144	178	7.40939	7.16993	7.10852	7.09803	7.18982	7.16993		2.76	10.5	17.79	25.04	11.34	21.8	23.92	26.1	A	A	A	A	H	H	H	H	H	H	H	H	A	A	A	A	A	A	A
623 f1	13.6	35.4	45.8	54.5	57.9	60.5	60.8	62.5	158	145	136	171	157	193	158	7.30378	7.17991	7.08746	7.41785	7.29462	7.59246	7.30378	2.2	13.24	20.44	26.57	11	20.93	24.35	26.39	H	A	A	A	A	A	A	A	H	A	A	A	A	A	A	A	A	A	A
624 f2	13.1	35	47.3	56.2	60	62.4	63.3	63.5	135	149	157	147	120	133	154	7.07682	7.21917	7.29462	7.19967	6.90689	7.05528	7.26679	2.06	11.91	20.48	26.78	10.66	21.71	24.82	26.51	A	A	A	A	A	A	A	A	H	H	H	H	H	H	H	H	H	H	A
625 f3	9.1	34.5	51.4	64.1	69.6	71.4	72.4	72	116	154	155	207	226	265	237	6.85798	7.26679	7.27612	7.69349	7.82018	8.04985	7.88874	1.19	12.27	22.55	32.6	7.69	20.99	26.48	28.67	A	A	A	A	A	A	A	A	A	A	A	A	A	A	A	A	A	A	A
626 f4	9.9	33.8	46.8	58.2	63.1	64.8	66.8	66.4	149	182	136	200	155	140	190	7.21917	7.50779	7.08746	7.64386	7.27612	7.12928	7.56986	1.26	12.5	21.2	30.31	8.7	19.97	23.64	26.18	A	A	A	A	A	A	A	A	A	A	A	A	A	A	A	A	A	A	A
627 f5	12.2	36.2	52.7	68.8	77	79.8	82.1	82.6	135	165	150	253	308	294	366	7.07682	7.36632	7.22882	7.98299	8.26679	8.19967	8.5157	2.18	12.66	24.42	35.06	9.45	22.32	26.53	30.67	A	A	A	H	H	H	H	H	H	H	H	H	H	H	H	A	A	A	A
633 f1	11.6	26.9	34.4	39	43.2	44.3	47.1	47.3	159	181	136	133	134	133	141	7.31288	7.49985	7.08746	7.05528	7.06609	7.05528	7.13955	1.32	8.24	11.41	13.5	9.85	18.1	21.19	22.66	A	A	A	A	A	A	A	A	A	H	H	H	H	H	H	H	H	H	H
634 f2	12.4	30	43.8	58.2	64.4	66	68.1	69.7	184	138	174	255	211	215	197	7.52356	7.10852	7.44294	7.99435	7.7211	7.74819	7.62205	1.74	11.29	19.62	30.34	10.1	17.83	22.26	25.15	H	H	H	A	A	A	A	A	A	H	H	H	H	H	H	H	H	H	H
635 f3	13.6	29.9	39.8	47.2	50.7	52.5	54.1	53.8	168	182	155	141	177	139	131	7.39232	7.50779	7.27612	7.13955	7.46761	7.11894	7.03342	1.56	9.3	15.78	21.93	11.63	19.45	22.19	23.41	H	H	H	H	H	H	H	H	H	A	A	A	A	A	A	A	A	A	H
636 f4	12	31.7	42.2	50.4	54	55.3	57.3	57.5	169	180	141	163	147	186	171	7.40088	7.49185	7.13955	7.34873	7.19967	7.53916	7.41785	1.97	12.21	18.4	24.01	9.83	18.45	21.48	23.85	A	A	A	A	H	H	H	H	H	A	A	A	H	H	H	H	H	H	H
637 f5	13	28.4	34.8	39	43.3	44.5	45.7	46.5	153	181	191	139	149	124	128	7.25739	7.49985	7.57743	7.11894	7.21917	6.9542	7	1.51	8.29	10.88	15.09	10.93	19.07	21.36	23.51	H	H	H	H	H	H	H	A	A	H	A	A	A	A	A	A	A	A	H
643 f1	10	35.1	48	63.7	67.2	69.2	69.8	69.1	165	198	163	329	265	247	281	7.36632	7.62936	7.34873	8.36194	8.04985	7.94837	8.13443	1.26	12.08	21.93	31.51	8.53	21.62	25.1	28.2	A	A	A	A	A	A	A	A	A	A	A	A	A	A	A	A	A	A	A
644 f2	9.4	33.3	46.2	56	59.5	61.5	61.9	64.2	124	170	131	134	180	137	195	6.9542	7.40939	7.03342	7.06609	7.49185	7.09803	7.60733	1.1	12.35	22.06	29.02	8.05	19.94	22.68	24.72	A	A	A	A	A	A	A	A	A	A	A	A	A	A	A	A	A	A	A
645 f3	9.7	35.9	50.7	62.9	67.2	68.7	70.2	70.4	103	193	113	209	192	142	222	6.6865	7.59246	6.82018	7.70736	7.58496	7.14975	7.79442	1.37	13.19	24.54	33.17	8.2	21.57	25.01	27.13	A	A	A	A	A	A	A	A	A	A	A	A	A	A	A	A	A	A	A
646 f4	13.6	35.2	52.1	61.4	66.9	68.9	71.6	72.1	141	135	138	144	223	180	246	7.13955	7.07682	7.10852	7.16993	7.8009	7.49185	7.94251	2.54	11.6	23.67	30.81	10.81	22.36	25.85	27.83	A	A	A	A	A	A	A	A	A	A	A	A	A	A	A	A	A	A	H
650 f1	14.3	35.8	54.9	70.3	75.7	76.5	78.8	80.4	139	178	219	284	234	251	373	7.11894	7.47573	7.77479	8.14975	7.87036	7.97154	7.97154	2	13.07	26.41	36.82	11.6	21.68	26.58	28.23	A	A	A	A	A	A	A	A	A	A	A	A	A	A	A	A	A	A	A
651 f2	14.6	32.5	47.8	59	64.7	66.9	68.7	68.7	197	169	149	255	214	377	361	7.62205	7.40088	7.21917	7.99435	7.74147	8.55842	8.55842	3.12	11.3	22.17	28.77	10.95	20.26	23.95	25.57	H	H	H	H	H	H	H	H	H	A	A	A	A	A	A	A	A	A	A
652 f3	13.6	34.3	50.1	63.6	68.8	72.4	73.5	72.8	163	210	213	295	208	318	278	7.34873	7.71425	7.73471	8.20457	7.70044	8.31288	8.31288	2.6	10.33	22.08	31.82	10.22	22.53	25.8	27.08	A	A	A	A	A	A	A	A	A	H	H	A	A	A	A	A	A	A	H
653 f4	11.9	28.6	37.8	48.8	50.5	53.4	54.7	56.2	145	173	129	124	118	123	124	7.17991	7.43463	7.01123	6.9542	6.88264	6.94251	6.94251	1.52	7.46	13.06	19.64	9.7	20.03	22.85	24.67	A	A	A	A	A	A	A	A	A	A	A	A	A	A	A	A	A	A	H
654 f5	14.8	33.3	49.7	60.8	64.8	66.9	68.6	70.1	161	167	190	393	496	501	534	7.33092	7.3837	7.56986	8.61839	8.9542	8.96867	8.96867	3.18	12.33	23.69	30.59	10.77	19.91	24.02	25.45	H	H	H	H	H	H	H	H	H	H	H	H	H	H	H	H	H	H	H
660 f1	13	36.9	51.2	61.9	67	68.7	69.4	70.2	169	155	192	248	203	284	178	7.40088	7.27612	7.58496	7.9542	7.66534	8.14975	8.14975	1.97	13.92	25.52	31.62	10.59	21.69	24.07	25.67	A	A	A	A	A	A	A	A	A	A	A	A	A	A	A	A	A	A	A
661 f2	12.6	29.4	41	52.2	57.1	59.4	60.4	60.9	164	203	235	165	175	230	162	7.35755	7.66534	7.87652	7.36632	7.45121	7.84549	7.84549	2.4	8.47	16.88	23.43	9.7	19.47	22.55	24.22	A	H	H	H	H	H	H	H	H	H	A	A	A	A	A	A	A	A	H
662 f3	14	32.6	47.5	57.8	61.5	63	63.9	63	131	151	253	360	362	428	390	7.03342	7.2384	7.98299	8.49185	8.49985	8.74147	8.74147	2.7	11.64	21.72	27.61	10.74	20.03	24.07	25.77	A	A	A	A	A	A	A	A	A	H	H	H	H	H	H	H	H	H	H
663 f4	11.4	31.7	46.5	55.6	59.5	61	61.5	62.3	156	170	190	149	129	131	166	7.2854	7.40939	7.56986	7.21917	7.01123	7.03342	7.03342	1.49	11.91	22.46	27.89	9.54	18.64	22.43	23.56	A	A	A	A	A	A	A	A	A	A	A	A	A	A	A	A	A	A	A
664 f5	12.3	33.2	45.8	54.3	58.4	61.7	63.2	62.1	135	191	177	139	146	150	163	7.07682	7.57743	7.46761	7.11894	7.18982	7.22882	7.22882	1.54	12.38	22.11	26.04	10.27	19.67	22.28	24	H	H	H	H	H	A	A	A	A	A	A	A	A	A	A	A	A	H	H
665 f6	12.5	33.8	44.5	51.2	52.3	52.8	54.1	53.4	164	185	132	140	124	133	123	7.35755	7.53138	7.04439	7.12928	6.9542	7.05528	7.05528	1.64	13.7	21.28	24.64	10.2	19.18	21.93	22.35	A	A	A	A	A	A	A	A	A	H	H	A	A	A	A	A	A	A	H
667 f8	11.3	30.6	44.4	55.3	59.2	60.5	63.2	62.4	159	201	198	141	174	166	175	7.31288	7.65105	7.62936	7.13955	7.44294	7.37504	7.37504	1.38	10.03	19.71	25.61	9.73	19.71	22.91	25.29	A	A	A	A	A	A	A	A	H	A	A	A	A	A	A	A	A	H	A
672 f1	8.6	31.9	47.6	56.2	59.3	60.8	62.2	63.5	150	167	152	187	159	169	193	7.22882	7.3837	7.24793	7.54689	7.31288	7.40088	7.40088	1.1	10.64	23.27	27.33	7.4	19.92	22.92	24.34	A	A	A	A	A	A	A	A	A	A	A	A	A	A	A	A	A	A	A
673 f2	12.7	34.4	47.9	61.6	65.4	67.1	68.3	69.7	160	142	158	136	141	164	170	7.32193	7.14975	7.30378	7.08746	7.13955	7.35755	7.35755	2.13	11.96	22.08	30.63	9.99	21.2	24.1	26.43	H	A	A	A	A	A	A	A	A	H	H	H	H	H	H	H	H	H	A
674 f3	8.8	31.3	46.7	61.6	66.9	68.9	70.1	69.8	138	209	174	155	232	200	173	7.10852	7.70736	7.44294	7.27612	7.85798	7.64386	7.64386	0.96	9.8	21.43	31.51	7.69	20.26	23.68	25.85	A	A	A	A	A	A	A	A	A	A	A	A	A	A	A	A	A	A	A
675 f4	13.9	32.4	47.6	60.4	65.1	67.3	67.9	68.5	171	167	170	201	186	230	206	7.41785	7.3837	7.40939	7.65105	7.53916	7.84549	7.84549	3.22	10.46	22.08	30.9	10.32	20.97	23.95	25.37	A	A	A	A	A	A	A	A	A	A	A	A	A	A	A	A	A	A	A
676 f5	12.1	29.1	37.8	43.6	47.4	47	49.3	50.5	165	189	175	142	132	156	145	7.36632	7.56224	7.45121	7.14975	7.04439	7.2854	7.2854	1.88	8.14	14.91	17.43	9.94	19.75	20.77	21.55	H	H	H	H	H	H	H	H	H	A	A	A	A	A	A	A	A	A	H
677 f6	10.5	26.6	33.6	42.6	44.7	45.7	47	47.1	136	230	154	148	187	132	160	7.08746	7.84549	7.26679	7.20945	7.54689	7.04439	7.04439	1.33	7.61	12.55	18.26	8.85	18.17	19.53	20.22	A	A	A	A	A	A	A	A	A	H	H	H	A	A	A	A	A	A	H
689 f1	13.3	35.7	54.8	67.4	71	72.1	73	74.4	189	186	186	194	224	188	204	7.56224	7.53916	7.53916	7.59991	7.80735	7.55459	7.55459	2.95	12.53	27.75	35.74	9.88	21.82	24.93	27.1	A	A	A	A	A	A	A	A	A	A	A	A	A	A	A	A	A	A	A
690 f2	11.7	33.8	52.3	64.8	69.5	72	73.9	75.2	133	165	174	146	166	216	279	7.05528	7.36632	7.44294	7.18982	7.37504	7.75489	7.75489	2.44	10.78	24.81	32.87	8.96	21.03	25.8	26.92	A	A	A	A	A	A	A	A	A	A	A	A	A	A	A	A	A	A	A
691 f3	9.6	31.4	45.6	52.7	55	57.5	58	58.6	139	173	223	198	164	174	181	7.11894	7.43463	7.8009	7.62936	7.35755	7.44294	7.44294	1.06	9.59	20.35	24.46	8.33	20.7	23.56	24.26	A	A	A	A	A	A	A	A	A	A	A	A	A	A	A	A	A	A	A
692 f4	13.2	34.8	53.4	65	69.3	72.2	73.8	73.3	156	136	169	255	198	280	261	7.2854	7.08746	7.40088	7.99435	7.62936	8.12928	8.12928	3.04	12.61	27.44	34.03	9.65	21.28	24.58	26.7	A	A	A	A	A	A	A	A	A	A	A	A	A	A	A	A	A	A	A
693 f5	8.8	30	43.8	54.9	60.2	61.8	63.3	62.4	180	183	200	137	227	211	311	7.49185	7.5157	7.64386	7.09803	7.82655	7.7211	7.7211	1.01	9.49	19.2	26.86	7.73	19.31	22.44	24.61	A	A	A	A	A	A	A	A	A	A	A	A	A	A	A	A	A	A	A
694 f6	7.8	25.2	38.8	48.3	50.4	52.6	53.5	53.8	115	173	174	187	141	270	210	6.84549	7.43463	7.44294	7.54689	7.13955	8.07682	8.07682	0.92	7.42	17.23	23.09	6.84	17.01	19.94	21.14	A	A	A	A	A	A	A	A	A	A	A	A	A	A	A	A	A	A	A
695 f1	13.2	30	38.6	43.7	46.7	46.4	47.6	46.7	154	177	164	132	166	173	152	7.26679	7.46761	7.35755	7.04439	7.37504	7.43463	7.24793	2.31	8.61	15.04	18.61	10.42	19.82	21.36	22.69	H	H	H	H	H	H	H	H	H	H	H	H	H	H	H	H	H	A	H
696 f2	14.8	40.1	53.3	64.3	71.4	72.5	73.3	72.3	216	170	153	194	335	201	244	7.75489	7.40939	7.25739	7.59991	8.38802	7.65105	7.93074	3.28	16.87	26.59	34.58	11.16	21.55	24.75	27.68	A	A	A	A	A	A	A	A	A	A	A	A	A	A	A	A	A	A	A
697 f3	11.4	30.2	37.2	43.8	49.2	49.7	50.9	50.7	154	148	141	138	201	161	185	7.26679	7.20945	7.13955	7.10852	7.65105	7.33092	7.53138	1.63	10.61	16.02	20.95	9.5	18.29	19.55	20.21	H	H	H	H	H	H	H	H	H	A	A	A	A	A	A	A	A	H	H
698 f4	12.3	32.1	44.9	54.4	59.4	60.7	58.5	57.7	151	163	149	144	180	254	77	7.2384	7.34873	7.21917	7.16993	7.49185	7.98868	6.26679	2.13	10.6	20.92	28.73	9.57	19.66	22.36	24.27	H	H	H	H	H	H	H	H	H	H	H	H	H	H	H	H	H	A	A
699 f5	12.2	33.2	48.9	60.3	67.5	69.2	70.5	71.7	168	171	123	221	285	297	288	7.39232	7.41785	6.94251	7.7879	8.15482	8.21432	8.16993	1.92	12.13	24.07	31.48	9.91	19.62	22.86	26.68	H	H	H	H	H	H	H	H	H	H	H	H	H	H	H	H	H	H	A
# unit Blood glucose: mg/dL
# unit Body weight, fat mass and leasn mass: grams
# unit Blood Glutamic acid: µmol/L
[truncated: 91 more columns]

## Sheet: N2(NZOx129P2) males
Maus ID	Blood glucose week 3	Blood glucose week 4	Blood glucose week 5	Blood glucose week 6	Blood glucose week 7	Blood glucose week 8	Blood glucose week 9	Blood glucose week 10	Blood glucose week 11	Blood glucose week 12	Blood glucose week 13	Blood glucose week 14	Blood glucose week 15	Blood glucose week 16	Blood glucose week 17	Blood glucose week 18	Fasting Blood glucose week 21	Blood glucose week 20	Fasting Blood glucose week 21	log2 Fasting Blood glucose week 3	log2 Blood glucose week 4	log2 Blood glucose week 5	log2 Blood glucose week 6	log2 Blood glucose week 7	log2 Blood glucose week 8	log2 Blood glucose week 9	log2 Blood glucose week 10	log2 Blood glucose week 11	log2 Blood glucose week 12	log2 Blood glucose week 13	log2 Blood glucose week 14	log2 Blood glucose week 15	log2 Blood glucose week 16	log2 Blood glucose week 17	log2 Blood glucose week 18	log2 Blood glucose week 19	log2 Blood glucose week 20	log2 Blood glucose week 21	Body weight week 3	Body weight week 4	Body weight week 5	Body weight week 6	Body weight week 7	Body weight week 8	Body weight week 9	Body weight week 10	Body weight week 11	Body weight week 12	Body weight week 13
206/1_m1	147	236	216	190	202	170	211	259	271	263	196	187	170	167	213	140	278	249	152	7.19967	7.88264	7.75489	7.56986	7.65821	7.40939	7.7211	8.01681	8.08215	8.03892	7.61471	7.54689	7.40939	7.3837	7.73471	7.12928	8.11894	7.96	7.24793	11.3	20.8	29.3	34.3	40.3	42.5	47.6	51.2	55.2	56.5	59.7
206/1_m4	150	223	212	197	160	194	195	148	188	246	190	188	140	196	208	160	144	161	139	7.22882	7.8009	7.72792	7.62205	7.32193	7.59991	7.60733	7.20945	7.55459	7.94251	7.56986	7.55459	7.12928	7.61471	7.70044	7.32193	7.16993	7.33092	7.11894	12.6	20.8	30.8	35.9	40.1	42.3	44	46.4	49.5	50.3	51.8
207/1A_m1	133	212	210	167	235	151	185	166	178	145	179	230	128	171	155	171	234	233	180	7.05528	7.72792	7.71425	7.3837	7.87652	7.2384	7.53138	7.37504	7.47573	7.17991	7.48382	7.84549	7	7.41785	7.27612	7.41785	7.87036	7.86419	7.49185	7.8	17.8	29.3	33.6	38.5	41.7	45	46.7	50	53.5	54.5
207/1A_m2	99	175	210	143	233	117	166	198	268	346	454	183	177	257	170	307	333	402	105	6.62936	7.45121	7.71425	7.15987	7.86419	6.87036	7.37504	7.62936	8.06609	8.43463	8.82655	7.5157	7.46761	8.00562	7.40939	8.26209	8.37938	8.65105	6.71425	9.5	21.9	33.8	38.8	43.8	45.7	49.5	53.1	55.6	59.6	62.8
207/1A_m3	151	185	184	137	227	151	173	161	135	171	194	155	144	150	128	191	205	189	176	7.2384	7.53138	7.52356	7.09803	7.82655	7.2384	7.43463	7.33092	7.07682	7.41785	7.59991	7.27612	7.16993	7.22882	7	7.57743	7.67948	7.56224	7.45943	10.4	21	30.3	34.7	38.6	39.4	42.3	46.7	50.3	53.8	55.9
207/1A_m4	141	197	207	151	175	148	156	146	149	119	209	153	151	124	154	131	139	146	184	7.13955	7.62205	7.69349	7.2384	7.45121	7.20945	7.2854	7.18982	7.21917	6.89482	7.70736	7.25739	7.2384	6.9542	7.26679	7.03342	7.11894	7.18982	7.52356	10.9	22.9	33	36.9	40.9	41.2	43.2	46.3	49	52.3	54.6
207/1B_m1	87	219	214	145	171	145	96	160	244	383	392	319	381	381	253	214	252	294	157	6.44294	7.77479	7.74147	7.17991	7.41785	7.17991	6.58496	7.32193	7.93074	8.5812	8.61471	8.31741	8.57365	8.57365	7.98299	7.74147	7.97728	8.19967	7.29462	10.6	21.2	31.1	36.6	33.7	40.4	43	46.6	50.1	55.3	58.1
207/1B_m2	118	193	156	160	241	197	118	191	178	324	199	231	119	224	101	144	196	146	132	6.88264	7.59246	7.2854	7.32193	7.91289	7.62205	6.88264	7.57743	7.47573	8.33985	7.63662	7.85175	6.89482	7.80735	6.65821	7.16993	7.61471	7.18982	7.04439	11.7	21.4	31.3	36	41.7	44.6	48.2	51.3	54.4	56.8	59.9
207/1B_m3	150	223	240	143	135	125	114	237	163	155	163	125	120	137	109	204	98	140	140	7.22882	7.8009	7.90689	7.15987	7.07682	6.96578	6.83289	7.88874	7.34873	7.27612	7.34873	6.96578	6.90689	7.09803	6.76818	7.67243	6.61471	7.12928	7.12928	10.5	20.9	31.3	37.3	40.7	42.3	43.8	47.8	50.9	53.4	55.7
208/1A_m1	156	190	183	136	184	151	147	154	117	168	174	153	108	156	132	126	122	173	142	7.2854	7.56986	7.5157	7.08746	7.52356	7.2384	7.19967	7.26679	6.87036	7.39232	7.44294	7.25739	6.75489	7.2854	7.04439	6.97728	6.93074	7.43463	7.14975	13	24.7	34.8	39	43.8	44.7	48.9	51.8	55.8	57.8	60
208/1A_m2	126	178	178	138	155	147	306	155	231	183	158	194	127	136	138	167	182	121	144	6.97728	7.47573	7.47573	7.10852	7.27612	7.19967	8.25739	7.27612	7.85175	7.5157	7.30378	7.59991	6.98868	7.08746	7.10852	7.3837	7.50779	6.91886	7.16993	9	20.3	30.6	34.8	40	42.7	47.1	51.2	53.9	57.5	59.5
208/1A_m3	145	196	204	161	186	178	282	172	198	421	259	223	221	281	290	191	253	233	176	7.17991	7.61471	7.67243	7.33092	7.53916	7.47573	8.13955	7.42626	7.62936	8.71768	8.01681	7.8009	7.7879	8.13443	8.17991	7.57743	7.98299	7.86419	7.45943	12.5	24.1	34.5	39.8	45	47.8	52.8	56.3	61	65.5	68.4
208/1A_m4	125	203	165	152	261	177	409	297	238	445	405	329	154	248	210	180	233	263	136	6.96578	7.66534	7.36632	7.24793	8.02791	7.46761	8.67596	8.21432	7.89482	8.79766	8.66178	8.36194	7.26679	7.9542	7.71425	7.49185	7.86419	8.03892	7.08746	12.5	24	33.2	37	43.7	45.5	51.1	55.1	57.8	62.5	65.5
208/1B_m1	118	238	189	160	331	250	234	177	497	493	435	364	292	244	302	322	382	300	215	6.88264	7.89482	7.56224	7.32193	8.37069	7.96578	7.87036	7.46761	8.9571	8.94544	8.76487	8.50779	8.18982	7.93074	8.2384	8.33092	8.57743	8.22882	7.74819	10.4	24.4	35.5	40.3	46.1	49.2	52.9	57.9	62.2	64.1	66.3
208/1B_m2	131	177	192	160	198	150	142	157	271	281	166	159	126	177	252	221	169	223	143	7.03342	7.46761	7.58496	7.32193	7.62936	7.22882	7.14975	7.29462	8.08215	8.13443	7.37504	7.31288	6.97728	7.46761	7.97728	7.7879	7.40088	7.8009	7.15987	11.3	21.6	31.9	36.5	42.3	45.7	48.8	52.8	56.9	59.1	61.1
208/1B_m3	141	221	191	168	421	396	326	203	417	487	398	301	248	414	453	368	504	422	190	7.13955	7.7879	7.57743	7.39232	8.71768	8.62936	8.34873	7.66534	8.7039	8.92778	8.63662	8.23362	7.9542	8.69349	8.82337	8.52356	8.97728	8.7211	7.56986	11	23.2	34.5	40.5	48.3	51.7	55.9	60.3	65	67	69.1
208/1B_m4	131	205	194	155	190	176	167	224	518	468	325	352	326	333	383	358	363	440	233	7.03342	7.67948	7.59991	7.27612	7.56986	7.45943	7.3837	7.80735	9.01681	8.87036	8.3443	8.45943	8.34873	8.37938	8.5812	8.48382	8.50383	8.78136	7.86419	10.3	21.1	32.4	37.4	43.4	46.6	50.3	55.3	59.2	62	63.8
213/1_m1	175	223	149	179	152	153	154	170	146	153	196	141	155	160	147	167	110	123	127	7.45121	7.8009	7.21917	7.48382	7.24793	7.25739	7.26679	7.40939	7.18982	7.25739	7.61471	7.13955	7.27612	7.32193	7.19967	7.3837	6.78136	6.94251	6.98868	13.9	28.1	34.9	39.8	42.8	44	45.5	48.6	51.5	53.3	56.2
213/1_m2	127	258	223	185	158	173	195	190	227	220	220	185	237	189	169	399	226	272	146	6.98868	8.01123	7.8009	7.53138	7.30378	7.43463	7.60733	7.56986	7.82655	7.78136	7.78136	7.53138	7.88874	7.56224	7.40088	8.64024	7.82018	8.08746	7.18982	12.3	24	35.2	40	42.6	43.7	49.5	53.9	55.9	58.6	63.6
213/1_m3	157	204	201	151	301	148	134	267	296	368	290	389	380	320	370	265	231	374	139	7.29462	7.67243	7.65105	7.2384	8.23362	7.20945	7.06609	8.0607	8.20945	8.52356	8.17991	8.60363	8.56986	8.32193	8.53138	8.04985	7.85175	8.54689	7.11894	12.5	27.4	38.1	42.9	48	49.6	54.5	60.4	64.7	67.1	69.5
209/1_m1	51	206	205	179	125	172	164	148	143	193	165	200	122	331	248	118	162	217	92	5.67243	7.6865	7.67948	7.48382	6.96578	7.42626	7.35755	7.20945	7.15987	7.59246	7.36632	7.64386	6.93074	8.37069	7.9542	6.88264	7.33985	7.76155	6.52356	6.2	14.9	22.9	29	33.8	36.1	39.9	43.7	46.1	48.5	50.6
209/1_m2	165	212	290	182	262	187	251	179	294	351	315	251	307	296	274	387	245	381	205	7.36632	7.72792	8.17991	7.50779	8.03342	7.54689	7.97154	7.48382	8.19967	8.45533	8.29921	7.97154	8.26209	8.20945	8.09803	8.59619	7.93664	8.57365	7.67948	11.1	23.6	28.3	33.6	40.1	41.7	45.3	47.6	50.5	51.8	54.2
209/1_m3	135	233	374	428	289	392	335	373	384	470	400	343	215	286	300	261	232	303	249	7.07682	7.86419	8.54689	8.74147	8.17493	8.61471	8.38802	8.54303	8.58496	8.87652	8.64386	8.42206	7.74819	8.15987	8.22882	8.02791	7.85798	8.24317	7.96	13	26.3	37.5	41.9	46.7	48.3	49.2	52.2	54.7	57.6	59.5
210/1A_m1	105	208	221	156	241	200	174	121	151	205	143	175	167	139	179	122	158	134	181	6.71425	7.70044	7.7879	7.2854	7.91289	7.64386	7.44294	6.91886	7.2384	7.67948	7.15987	7.45121	7.3837	7.11894	7.48382	6.93074	7.30378	7.06609	7.49985	6.7	15.5	24.7	31.5	35.9	39.4	42.8	45.8	45.6	48.4	50
210/1A_m2	190	214	204	325	311	390	242	380	239	492	283	251	323	308	205	176	179	225	120	7.56986	7.74147	7.67243	8.3443	8.28077	8.60733	7.91886	8.56986	7.90087	8.94251	8.14466	7.97154	8.33539	8.26679	7.67948	7.45943	7.48382	7.81378	6.90689	14.9	26.2	33.2	39.8	43.1	47	50.1	55.1	55	58.5	58.2
210/1A_m3	122	190	129	179	111	134	168	182	130	105	141	106	111	132	147	156	131	140	127	6.93074	7.56986	7.01123	7.48382	6.79442	7.06609	7.39232	7.50779	7.02237	6.71425	7.13955	6.72792	6.79442	7.04439	7.19967	7.2854	7.03342	7.12928	6.98868	8.1	17.6	26	33.7	37.5	39.7	42.8	44.7	44.5	46.6	46.9
210/1A_m4	100	185	209	162	189	155	154	164	176	156	213	201	214	263	292	137	191	169	125	6.64386	7.53138	7.70736	7.33985	7.56224	7.27612	7.26679	7.35755	7.45943	7.2854	7.73471	7.65105	7.74147	8.03892	8.18982	7.09803	7.57743	7.40088	6.96578	6.5	15.9	24.9	31.3	33.6	38.7	40.2	42.9	45.4	46.9	49.1
210/1A_m5	146	245	175	183	276	199	189	149	170	224	207	143	220	270	210	197	228	181	115	7.18982	7.93664	7.45121	7.5157	8.10852	7.63662	7.56224	7.21917	7.40939	7.80735	7.69349	7.15987	7.78136	8.07682	7.71425	7.62205	7.83289	7.49985	6.84549	14.6	26.7	34.5	41.7	45.2	50	52.6	57	58.8	62.6	64.9
210/1B_m1	88	201	174	202	226	135	154	149	175	175	174	183	150	169	160	152	131	150	159	6.45943	7.65105	7.44294	7.65821	7.82018	7.07682	7.26679	7.21917	7.45121	7.45121	7.44294	7.5157	7.22882	7.40088	7.32193	7.24793	7.03342	7.22882	7.31288	6	14.5	25.4	32	38.6	42.1	45.1	48.1	50.2	54.7	56.3
210/1B_m2	176	195	267	165	231	223	248	440	352	472	468	373	496	535	482	472	496	385	293	7.45943	7.60733	8.0607	7.36632	7.85175	7.8009	7.9542	8.78136	8.45943	8.88264	8.87036	8.54303	8.9542	9.0634	8.91289	8.88264	8.9542	8.58871	8.19476	14.6	27.2	34.9	39.4	44	48.1	49.7	55.4	57.3	61.3	63.6
210/1B_m4	92	178	168	222	123	112	123	94	111	118	149	150	122	152	148	125	169	164	191	6.52356	7.47573	7.39232	7.79442	6.94251	6.80735	6.94251	6.55459	6.79442	6.88264	7.21917	7.22882	6.93074	7.24793	7.20945	6.96578	7.40088	7.35755	7.57743	5.9	15.1	25.2	30.6	37	39.7	41.4	43.7	45.2	48.6	49.8
210/1B_m5	109	178	182	220	139	193	175	131	97	133	252	159	144	129	144	186	176	129	135	6.76818	7.47573	7.50779	7.78136	7.11894	7.59246	7.45121	7.03342	6.59991	7.05528	7.97728	7.31288	7.16993	7.01123	7.16993	7.53916	7.45943	7.01123	7.07682	6.9	15.6	25	30.1	35.4	39.2	42.1	46.2	49.3	52.9	55.7
214/1_m1	137	181	117	320	136	196	187	175	211	209	423	441	461	490	565	578	499	512	185	7.09803	7.49985	6.87036	8.32193	7.08746	7.61471	7.54689	7.45121	7.7211	7.70736	8.72451	8.78463	8.84862	8.93664	9.14211	9.17493	8.9629	9	7.53138	15	27.2	33.9	37.5	39.5	44.2	44.2		49.1	53.7	56.4
214/1_m2	130	214	185	292	147	154	166	165	177	110	135	137	124	139	162	137	168	144	153	7.02237	7.74147	7.53138	8.18982	7.19967	7.26679	7.37504	7.36632	7.46761	6.78136	7.07682	7.09803	6.9542	7.11894	7.33985	7.09803	7.39232	7.16993	7.25739	13.4	26.1	31.5	37	39.4	40.8	40.7	43.2	44.4	46.6	47.8
214/1_m3	151	289	149	194	119	167	176	135	155	119	194	152	174	211	324	296	277	299	157	7.2384	8.17493	7.21917	7.59991	6.89482	7.3837	7.45943	7.07682	7.27612	6.89482	7.59991	7.24793	7.44294	7.7211	8.33985	8.20945	8.11374	8.224	7.29462	12.8	26.4	32.2	36.5	37.4	41.3	41.8	45.7	47.2	50.4	53.2
214/1_m4	164	225	201	250	144	182	167	185	138	137	129	151	129	107	162	191	159	157	154	7.35755	7.81378	7.65105	7.96578	7.16993	7.50779	7.3837	7.53138	7.10852	7.09803	7.01123	7.2384	7.01123	6.74147	7.33985	7.57743	7.31288	7.29462	7.26679	14.9	26.5	32.8	39.1	42.9	47	49.7	52.9	55.4	58.1	60.4
215/1A_m1	151	242	152	367	253	151	221	306	308	336	271	256	282	237	222	397	410	300	162	7.2384	7.91886	7.24793	8.51964	7.98299	7.2384	7.7879	8.25739	8.26679	8.39232	8.08215	8	8.13955	7.88874	7.79442	8.633	8.67948	8.22882	7.33985	18.1	28.8	34.5	37.9	41.6	44.4	47.1	50.6	51.8	55.2	56.8
215/1A_m2	140	228	267	222	251	183	146	159	157	158	185	156	221	160	229	268	352	191	137	7.12928	7.83289	8.0607	7.79442	7.97154	7.5157	7.18982	7.31288	7.29462	7.30378	7.53138	7.2854	7.7879	7.32193	7.8392	8.06609	8.45943	7.57743	7.09803	11.7	22.8	31.8	35.4	38.5	42.5	43.3	47.7	50.8	54.4	57.5
215/1A_m3	157	234	130	189	351	524	265	308	398	230	359	185	448	203	258	276	284	179	119	7.29462	7.87036	7.02237	7.56224	8.45533	9.03342	8.04985	8.26679	8.63662	7.84549	8.48784	7.53138	8.80735	7.66534	8.01123	8.10852	8.14975	7.48382	6.89482	13.6	24.5	31.5	36.5	41.6	46.2	46.8	49.9	51.5	53.8	56.5
215/1A_m4	115	221	144	152	153	137	159	183	129	157	128	92	110	107	153	165	120	139	108	6.84549	7.7879	7.16993	7.24793	7.25739	7.09803	7.31288	7.5157	7.01123	7.29462	7	6.52356	6.78136	6.74147	7.25739	7.36632	6.90689	7.11894	6.75489	16.1	26.1	32	36.1	39.6	43.6	46	48.8	51.3	54.1	57.1
215/1B_m1	180	240	155	163	177	164	125	195	229	176	460	175	223	275	275	305	300	296	153	7.49185	7.90689	7.27612	7.34873	7.46761	7.35755	6.96578	7.60733	7.8392	7.45943	8.84549	7.45121	7.8009	8.10329	8.10329	8.25267	8.22882	8.20945	7.25739	16.1	26.6	31.8	36.7	39.7	43.6	45.3	47.7	50	52.1	54.6
215/1B_m2	127	275	179	231	404	280	244	431	380	461	323	281	106	135	145	113	117	128	140	6.98868	8.10329	7.48382	7.85175	8.65821	8.12928	7.93074	8.75154	8.56986	8.84862	8.33539	8.13443	6.72792	7.07682	7.17991	6.82018	6.87036	7	7.12928	11.8	22.1	31.7	38.1	43.4	46	47.6	52.8	55.9	59.7	61.3
205/1_m1	151	172	178	185	211	191	446	386	320	250	273	276	218	265	284	324	468	231	134	7.2384	7.42626	7.47573	7.53138	7.7211	7.57743	8.8009	8.59246	8.32193	7.96578	8.09276	8.10852	7.76818	8.04985	8.14975	8.33985	8.87036	7.85175	7.06609	16.1	27.3	33.2	33.9	45.3	47.1	52.5	55.5	56.7	57.9	59.5
211/1_m1	120	170	173	280	342	273	247	342	373	434	504	350	308	309	290	390	386	280	174	6.90689	7.40939	7.43463	8.12928	8.41785	8.09276	7.94837	8.41785	8.54303	8.76155	8.97728	8.45121	8.26679	8.27146	8.17991	8.60733	8.59246	8.12928	7.44294	11.3	22.2	33.5	42	48.7	51.4	56.3	60	63.3	66	68.5
211/1_m2	96	232	167	247	463	365	347	508	464	559	533	470	477	273	480	577	544	446	480	6.58496	7.85798	7.3837	7.94837	8.85487	8.51175	8.43879	8.98868	8.85798	9.1267	9.05799	8.87652	8.89785	8.09276	8.90689	9.17243	9.08746	8.8009	8.90689	10.3	22.4	30.7	38.9	45.8	48.6	53.8	58.7	61.8	65	68.2
211/1_m4	78	255	200	256	266	181	210	351	360	282	462	471	333	300	493	441	456	306	85	6.2854	7.99435	7.64386	8	8.05528	7.49985	7.71425	8.45533	8.49185	8.13955	8.85175	8.87958	8.37938	8.22882	8.94544	8.78463	8.83289	8.25739	6.40939	10.6	20	31.2	39	45.5	50.3	55.5	58.8	63.2	66.5	69.8
211/1_m5	139	211	257	300	253	187	167	290	173	308	192	292	163	454	419	437	411	191	193	7.11894	7.7211	8.00562	8.22882	7.98299	7.54689	7.3837	8.17991	7.43463	8.26679	7.58496	8.18982	7.34873	8.82655	8.71081	8.77149	8.68299	7.57743	7.59246	11.1	19.7	32.7	40.6	45.5	48.7	51.6	55.8	57.4	60.1	62.2
211/1_m6	151	191	180	288	183	126	219	301	384	406	284	412	401	307	378	452	78	98	114	7.2384	7.57743	7.49185	8.16993	7.5157	6.97728	7.77479	8.23362	8.58496	8.66534	8.14975	8.6865	8.64746	8.26209	8.56224	8.82018	6.2854	6.61471	6.83289	18.8	30.8	37.8	44.6	48	49.4	54.9	59.4	63.1	65.3	67.1
218/1_m2	171	223	273	228	148	502	175	389	430	589	434	525	478	255	194	330	465	469	282	7.41785	7.8009	8.09276	7.83289	7.20945	8.97154	7.45121	8.60363	8.74819	9.20212	8.76155	9.03617	8.90087	7.99435	7.59991	8.36632	8.86109	8.87344	8.13955	12.3	20.7	31.1	34.8	38.5	49.3	46.4	51	54.9	49.9	62.6
218/1_m3	114	209	238	195	380	156	250	336	293	201	403	481	351	293	160	238	343	208	151	6.83289	7.70736	7.89482	7.60733	8.56986	7.2854	7.96578	8.39232	8.19476	7.65105	8.65464	8.90989	8.45533	8.19476	7.32193	7.89482	8.42206	7.70044	7.2384	10.8	22.7	31.8	40.2	44.4	42.8	51.3	56.2	59.4	64	66.8
218/1_m4	125	182	215	192	173	196	192	278	298	229	350	364	318	234	195	286	120	175	144	6.96578	7.50779	7.74819	7.58496	7.43463	7.61471	7.58496	8.11894	8.21917	7.8392	8.45121	8.50779	8.31288	7.87036	7.60733	8.15987	6.90689	7.45121	7.16993	13.1	24.1	36.1	43.7	48.7	53.7	56.8	62.3	66.4	70.7	74.2
218/1_m5	128	193	202	239	191	231	187	228	259	339	471	453	471	415	498	342	481	322	281	7	7.59246	7.65821	7.90087	7.57743	7.85175	7.54689	7.83289	8.01681	8.40514	8.87958	8.82337	8.87958	8.69697	8.96	8.41785	8.90989	8.33092	8.13443	12	22.7	32.2	32.3	34.1	38.2	41	46.1	50.2	53.5	57.1
219/1_m1	106	193	249	240	193	160	190	169	236	222	220	260	216	235	267	197	260	133	89	6.72792	7.59246	7.96	7.90689	7.59246	7.32193	7.56986	7.40088	7.88264	7.79442	7.78136	8.02237	7.75489	7.87652	8.0607	7.62205	8.02237	7.05528	6.47573	9.7	19.4	28.6	35.3	39.7	44.8	46.1	49.9	52.1	55.8	56
219/1_m2	111	219	260	206	219	189	174	164	222	211	161	249	194	201	165	167	216	146	90	6.79442	7.77479	8.02237	7.6865	7.77479	7.56224	7.44294	7.35755	7.79442	7.7211	7.33092	7.96	7.59991	7.65105	7.36632	7.3837	7.75489	7.18982	6.49185	10.1	19.4	23.7	37	42.5	47.9	49.8	53.6	55.4	58.8	60.2
219/1_m3	127	190	240	157	189	163	154	180	200	161	118	131	142	238	137	126	128	117	58	6.98868	7.56986	7.90689	7.29462	7.56224	7.34873	7.26679	7.49185	7.64386	7.33092	6.88264	7.03342	7.14975	7.89482	7.09803	6.97728	7	6.87036	5.85798	10	20.3	30.8	37.4	43.1	46.7	49.1	53.5	54.3	55.2	53.9
219/1_m4	105	239	219	146	178	151	142	204	161	292	202	245	214	172	215	270	367	322	69	6.71425	7.90087	7.77479	7.18982	7.47573	7.2384	7.14975	7.67243	7.33092	8.18982	7.65821	7.93664	7.74147	7.42626	7.74819	8.07682	8.51964	8.33092	6.10852	10.7	20.4	28.8	33.3	37.5	42	45.1	49.8	52.4	55	55.8
221/1_m1	120	168	222	183	193	194	193	202	229	165	350	238	246	183	244	242	159	140	139	6.90689	7.39232	7.79442	7.5157	7.59246	7.59991	7.59246	7.65821	7.8392	7.36632	8.45121	7.89482	7.94251	7.5157	7.93074	7.91886	7.31288	7.12928	7.11894	11.1	20.6	29.4	35.2	41.1	44.8	48.6	52	54.8	56.9	59.3
221/1_m2	151	192	391	222	184	168	216	313	427	489	400	408	430	110	491	461	420	270	142	7.2384	7.58496	8.61102	7.79442	7.52356	7.39232	7.75489	8.29002	8.73809	8.93369	8.64386	8.67243	8.74819	6.78136	8.93958	8.84862	8.71425	8.07682	7.14975	13.4	22.6	31	36.6	41.9	45.9	48.3	53.1	55.5	59.8	62.9
221/1_m3	129	132	211	147	230	170	320	206	278	203	227	370	382	177	330	235	305	211	126	7.01123	7.04439	7.7211	7.19967	7.84549	7.40939	8.32193	7.6865	8.11894	7.66534	7.82655	8.53138	8.57743	7.46761	8.36632	7.87652	8.25267	7.7211	6.97728	12.8	23.8	33	39.2	43.7	47	50	53.7	53.6	55.9	59.3
221/1_m4	133	250	219	154	228	230	457	446	253	257	420	139	192	281	289	156	185	122	111	7.05528	7.96578	7.77479	7.26679	7.83289	7.84549	8.83605	8.8009	7.98299	8.00562	8.71425	7.11894	7.58496	8.13443	8.17493	7.2854	7.53138	6.93074	6.79442	13.9	26.2	34.5	41.6	48.4	53.3	57.5	64.1	65.1	69.2	71.1
221/1_m5	140	161	246	142	175	203	227	244	311	412	249	432	368	359	219	113	177	146	173	7.12928	7.33092	7.94251	7.14975	7.45121	7.66534	7.82655	7.93074	8.28077	8.6865	7.96	8.75489	8.52356	8.48784	7.77479	6.82018	7.46761	7.18982	7.43463	12	23.4	32.6	38	44.9	49.1	51.7	56.4	59.6	62.7	64.6
222/1_m1	120	194	230	192	278	249	186	378	298	253	255	424	274	452	432	193	449	306	162	6.90689	7.59991	7.84549	7.58496	8.11894	7.96	7.53916	8.56224	8.21917	7.98299	7.99435	8.72792	8.09803	8.82018	8.75489	7.59246	8.81057	8.25739	7.33985	12.8	23.5	35.1	41.8	48.3	53.7	54.1	58.7	61.2	64.4	66.3
222/1_m2	80	165	231	223	163	191	156	177	190	185	193	192	236	161	299	180	205	170	150	6.32193	7.36632	7.85175	7.8009	7.34873	7.57743	7.2854	7.46761	7.56986	7.53138	7.59246	7.58496	7.88264	7.33092	8.224	7.49185	7.67948	7.40939	7.22882	10.2	21.8	32	37	40.9	44.7	46.2	49.6	52.4	53.1	55.3
216/1_m1	131	232	179	156	294	223	366	370	448	358	462	524	331	459	390	346	239	244	172	7.03342	7.85798	7.48382	7.2854	8.19967	7.8009	8.5157	8.53138	8.80735	8.48382	8.85175	9.03342	8.37069	8.84235	8.60733	8.43463	7.90087	7.93074	7.42626	12.5	25.3	34.6	37.7	48.6	50.3	54.7	59.1	62	63.6	65.8
216/1_m2	155	225	199	183	262	223	338	207	310	448	424	300	462	423	474	433	420	382	254	7.27612	7.81378	7.63662	7.5157	8.03342	7.8009	8.40088	7.69349	8.27612	8.80735	8.72792	8.22882	8.85175	8.72451	8.88874	8.75822	8.71425	8.57743	7.98868	12.3	23.1	32.4	40.6	46.7	48.2	52.8	56.7	58.4	61.2	63.7
216/1_m3	111	214	192	187	180	217	171	208	212	244	236	202	267	358	410	310	230	274	144	6.79442	7.74147	7.58496	7.54689	7.49185	7.76155	7.41785	7.70044	7.72792	7.93074	7.88264	7.65821	8.0607	8.48382	8.67948	8.27612	7.84549	8.09803	7.16993	13.3	24.2	31.9	41.9	43	45.4	49.3	53.5	54.6	56.5	60.5
220/1_A_m1	140	176	169	141	171	342	190	104	162	206	170	374	328	341	330	265	153	150	190	7.12928	7.45943	7.40088	7.13955	7.41785	8.41785	7.56986	6.70044	7.33985	7.6865	7.40939	8.54689	8.35755	8.41363	8.36632	8.04985	7.25739	7.22882	7.56986	11.6	23.2	33.9	39	42.5	43.1	41.5	45.1	50.1	55.4	59
220/1_A_m2	119	154	181	162	114	135	144	180	129	272	157	256	435	405	359	294	362	357	150	6.89482	7.26679	7.49985	7.33985	6.83289	7.07682	7.16993	7.49185	7.01123	8.08746	7.29462	8	8.76487	8.66178	8.48784	8.19967	8.49985	8.47978	7.22882	9	19.7	29	33.8	38	39	42	45.7	48.1	49.9	51.9
220/1_A_m3	125	155	270	160	139	170	125	205	231	244	185	385	388	388	348	259	330	353	130	6.96578	7.27612	8.07682	7.32193	7.11894	7.40939	6.96578	7.67948	7.85175	7.93074	7.53138	8.58871	8.59991	8.59991	8.44294	8.01681	8.36632	8.46352	7.02237	8.9	18.1	28.8	35.1	40.2	41.9	45.2	47.9	51.8	54.5	56
220/1_A_m4	104	149	210	155	187	196	151	164	223	152	173	187	190	147	204	131	170	228	155	6.70044	7.21917	7.71425	7.27612	7.54689	7.61471	7.2384	7.35755	7.8009	7.24793	7.43463	7.54689	7.56986	7.19967	7.67243	7.03342	7.40939	7.83289	7.27612	8.7	17.8	27.3	33.6	39.7	40.5	44.3	47.9	51.5	53.5	55.8
220/1_A_m5	113	124	218	208	144	175	284	314	272	404	145	196	231	216	276	306	361	278	132	6.82018	6.9542	7.76818	7.70044	7.16993	7.45121	8.14975	8.29462	8.08746	8.65821	7.17991	7.61471	7.85175	7.75489	8.10852	8.25739	8.49586	8.11894	7.04439	8.7	17.8	28.4	34.4	39.5	40.6	45.1	48.9	51.1	53.38	53.5
220/1_B_m1	119	167	271	187	202	198	266	249	446	258	325	552	396	407	392	260	425	384	101	6.89482	7.3837	8.08215	7.54689	7.65821	7.62936	8.05528	7.96	8.8009	8.01123	8.3443	9.10852	8.62936	8.66888	8.61471	8.02237	8.73132	8.58496	6.65821	10.2	20.2	30.4	39.6	45	46.3	49.7	53.4	55.6	57.4	59.1
220/1_B_m2	167	176	264	112	177	198	218	407	362	312	373	420	494	465	531	502	486	512	503	7.3837	7.45943	8.04439	6.80735	7.46761	7.62936	7.76818	8.66888	8.49985	8.2854	8.54303	8.71425	8.94837	8.86109	9.05257	8.97154	8.92481	9	8.97441	11.1	21.2	28.9	33.1	37.5	40.9	45.1	48.6	51.5	53.7	56.7
220/1_B_m3	117	155	226	162	190	193	121	196	108	388	339	585	395	348	415	304	331	329	171	6.87036	7.27612	7.82018	7.33985	7.56986	7.59246	6.91886	7.61471	6.75489	8.59991	8.40514	9.19229	8.62571	8.44294	8.69697	8.24793	8.37069	8.36194	7.41785	10.1	19.1	26.1	29.7	34.8	36.5	41.4	44.2	46.1	49.8	51.3
220/1_B_m4	135	147	247	152	189	196	203	214	435	228	349	388	547	515	592	585	569	563	567	7.07682	7.19967	7.94837	7.24793	7.56224	7.61471	7.66534	7.74147	8.76487	7.83289	8.44708	8.59991	9.0954	9.00843	9.20945	9.19229	9.15228	9.13699	9.1472	11.5	22.2	32	38.3	43.8	46.4	50.8	54.4	56.5	59.3	62.9
220/1_B_m5	126	167	197	174	157	208	135	208	196	191	309	252	226	204	269	283	177	289	109	6.97728	7.3837	7.62205	7.44294	7.29462	7.70044	7.07682	7.70044	7.61471	7.57743	8.27146	7.97728	7.82018	7.67243	8.07146	8.14466	7.46761	8.17493	6.76818	11.1	20.5	28.5	33.5	37.7	41.6	44	49.1	52.2	54.5	57.4
216/2_m1	107	181	357	152	156	189	120	236	367	152	362	403	446	441	412	402	450	450	191	6.74147	7.49985	8.47978	7.24793	7.2854	7.56224	6.90689	7.88264	8.51964	7.24793	8.49985	8.65464	8.8009	8.78463	8.6865	8.65105	8.81378	8.81378	7.57743	11	18.6	27.7	32.8	37.7	41.8	44.8	49.4	53.7	54.1	57.1
216/2_m2	103	178	250	181	242	181	226	255	244	162	288	445	464	377	325	406	378	288	176	6.6865	7.47573	7.96578	7.49985	7.91886	7.49985	7.82018	7.99435	7.93074	7.33985	8.16993	8.79766	8.85798	8.55842	8.3443	8.66534	8.56224	8.16993	7.45943	11.1	20.9	31.1	35	40.3	44.7	49.1	52.1	55.3	56.8	59.8
219/2_m1	108	167	214	183	274	252	152	196	228	149	227	194	142	153	146	176	149	144	172	6.75489	7.3837	7.74147	7.5157	8.09803	7.97728	7.24793	7.61471	7.83289	7.21917	7.82655	7.59991	7.14975	7.25739	7.18982	7.45943	7.21917	7.16993	7.42626	10.1	20.3	31.1	37	41.6	42.5	46.3	48.4	49.9	51.1	50.3
219/2_m2	127	151	230	127	132	237	121	221	177	183	179	168	137	219	126	122	147	136	139	6.98868	7.2384	7.84549	6.98868	7.04439	7.88874	6.91886	7.7879	7.46761	7.5157	7.48382	7.39232	7.09803	7.77479	6.97728	6.93074	7.19967	7.08746	7.11894	9.9	18	27.6	31.9	37.3	38.6	41.6	45.2	45.8	46.6	46.1
221/2_m1	131	179	195	183	182	229	161	149	121	127	177	300	400	309	328	209	334	299	175	7.03342	7.48382	7.60733	7.5157	7.50779	7.8392	7.33092	7.21917	6.91886	6.98868	7.46761	8.22882	8.64386	8.27146	8.35755	7.70736	8.3837	8.224	7.45121	11.4	20.5	28.5	32.8	36.2	38.4	41.1	43.2	46.4	48.4	51.4
221/2_m2	111	178	275	140	170	180	137	219	141	289	299	547	391	328	185	239	321	290	128	6.79442	7.47573	8.10329	7.12928	7.40939	7.49185	7.09803	7.77479	7.13955	8.17493	8.224	9.0954	8.61102	8.35755	7.53138	7.90087	8.32643	8.17991	7	11.5	18.8	27.7	31.9	35.1	38.3	39.2	42.8	46.6	50.7	54.2
221/2_m3	113	185	214	132	157	187	147	160	163	155	151	366	294	185	188	139	279	192	97	6.82018	7.53138	7.74147	7.04439	7.29462	7.54689	7.19967	7.32193	7.34873	7.27612	7.2384	8.5157	8.19967	7.53138	7.55459	7.11894	8.12412	7.58496	6.59991	11.8	21.5	31	35.9	39.5	41	43	45.8	49.1	52.4	55.5
221/2_m4	141	182	276	156	196	193	167	279	135	215	428	395	174	145	132	143	172	143	218	7.13955	7.50779	8.10852	7.2854	7.61471	7.59246	7.3837	8.12412	7.07682	7.74819	8.74147	8.62571	7.44294	7.17991	7.04439	7.15987	7.42626	7.15987	7.76818	12.5	22.9	33	39.1	44.6	48.2	50.4	54.9	57.3	60.9	63.4
222/2_m3	132	188	178	186	205	197	105	200	171	159	153	241	245	306	249	229	207	219	161	7.04439	7.55459	7.47573	7.53916	7.67948	7.62205	6.71425	7.64386	7.41785	7.31288	7.25739	7.91289	7.93664	8.25739	7.96	7.8392	7.69349	7.77479	7.33092	11.8	20.6	28.8	33.6	37.8	42.9	43.5	47.7	49.9	51.1	54
222/2_m4	142	253	216	185	153	178	259	143	168	219	133	141	225	198	200	234	174	178	127	7.14975	7.98299	7.75489	7.53138	7.25739	7.47573	8.01681	7.15987	7.39232	7.77479	7.05528	7.13955	7.81378	7.62936	7.64386	7.87036	7.44294	7.47573	6.98868	14.4	26.5	36	42.2	44.8	50.4	53	55.9	57.8	58.9	61
226/1_m1	119	214	275	199	191	208	199	195	134	177	218	130	164	136	226	136	147	164	130	6.89482	7.74147	8.10329	7.63662	7.57743	7.70044	7.63662	7.60733	7.06609	7.46761	7.76818	7.02237	7.35755	7.08746	7.82018	7.08746	7.19967	7.35755	7.02237	10.4	24.6	29.7	36.5	39	40.1	43	45.5	44.9	47.3	49.3
226/1_m2	101	216	220	163	214	224	171	286	264	288	425	405	369	442	377	251	264	286	236	6.65821	7.75489	7.78136	7.34873	7.74147	7.80735	7.41785	8.15987	8.04439	8.16993	8.73132	8.66178	8.52748	8.7879	8.55842	7.97154	8.04439	8.15987	7.88264	9.2	24.1	29.5	37.2	40.6	42.8	47.7	51.8	54.6	57.7	60.6
226/1_m3	131	123	414	136	67	229	216	227	188	211	198	344	318	336	293	155	278	250	119	7.03342	6.94251	8.69349	7.08746	6.06609	7.8392	7.75489	7.82655	7.55459	7.7211	7.62936	8.42626	8.31288	8.39232	8.19476	7.27612	8.11894	7.96578	6.89482	10.5	25.6	32.2	39.2	42.7	46.2	50.5	54.5	65.4	59.6	62.3
226/1_m4	121	180	180	147	172	192	162	148	131	192	145	138	202	134	131	103	130	117	117	6.91886	7.49185	7.49185	7.19967	7.42626	7.58496	7.33985	7.20945	7.03342	7.58496	7.17991	7.10852	7.65821	7.06609	7.03342	6.6865	7.02237	6.87036	6.87036	9.2	24.3	29.7	37.9	42.5	44.3	48.4	51.6	52.1	55.9	58.8
226/1_m5	137	172	283	218	217	146	203	149	149	200	170	118	135	126	124	116	134	120	135	7.09803	7.42626	8.14466	7.76818	7.76155	7.18982	7.66534	7.21917	7.21917	7.64386	7.40939	6.88264	7.07682	6.97728	6.9542	6.85798	7.06609	6.90689	7.07682	9	23.2	28.8	35.7	38.6	41.7	44.5	47.6	48.7	50.6	53.6
226/1_m7	159	153	264	299	167	167	397	457	517	498	529	587	589	600	576	530	523	600	506	7.31288	7.25739	8.04439	8.224	7.3837	7.3837	8.633	8.83605	9.01402	8.96	9.04712	9.19722	9.20212	9.22882	9.16993	9.04985	9.03067	9.22882	8.98299	13	27	31.4	37.9	41.4	43.9	48.8	51.7	55.1	58.6	61.1
226/1_m8	148	187	236	480	178	271	452	506	497	467	598	477	527	426	551	490	447	424	203	7.20945	7.54689	7.88264	8.90689	7.47573	8.08215	8.82018	8.98299	8.9571	8.86728	9.224	8.89785	9.04166	8.73471	9.10591	8.93664	8.80413	8.72792	7.66534	12.9	28.5	32.2	39.6	42.6	46.5	51.4	54.9	58.2	60.8	64.6
205/2_m1	156	229	244	236	276	327	313	328	266	183	231	183	283	316	265	235	192	206	143	7.2854	7.8392	7.93074	7.88264	8.10852	8.35315	8.29002	8.35755	8.05528	7.5157	7.85175	7.5157	8.14466	8.30378	8.04985	7.87652	7.58496	7.6865	7.15987	11.6	21.5	33.7	40.3	48.3	53.1	56	61.2	61.5	65.6	67.4
205/2_m2	171	219	398	332	310	348	400	298	533	429	515	475	504	325	324	328	348	351	237	7.41785	7.77479	8.63662	8.37504	8.27612	8.44294	8.64386	8.21917	9.05799	8.74483	9.00843	8.89178	8.97728	8.3443	8.33985	8.35755	8.44294	8.45533	7.88874	13.8	21.5	35.3	41.5	46.7	51.7	55.2	59.7	62.2	66.5	71.4
205/2_m3	158	235	191	143	195	239	163	147	211	138	189	131	157	146	137	114	122	157	125	7.30378	7.87652	7.57743	7.15987	7.60733	7.90087	7.34873	7.19967	7.7211	7.10852	7.56224	7.03342	7.29462	7.18982	7.09803	6.83289	6.93074	7.29462	6.96578	12.1	20.2	31.4	37.4	44.6	47.7	50.6	54.5	56.3	59.3	61
205/2_m4	144	168	157	237	101	166	137	189	371	370	371	425	475	460	378	325	385	437	271	7.16993	7.39232	7.29462	7.88874	6.65821	7.37504	7.09803	7.56224	8.53528	8.53138	8.53528	8.73132	8.89178	8.84549	8.56224	8.3443	8.58871	8.77149	8.08215	11.6	18.2	28.8	34.4	39.4	43.7	47	50.7	53.1	57.1	61.4
223/1_m1	169	226	248	218	134	205	205	188	194	170	269	184	322	318	265	178	187	216	122	7.40088	7.82018	7.9542	7.76818	7.06609	7.67948	7.67948	7.55459	7.59991	7.40939	8.07146	7.52356	8.33092	8.31288	8.04985	7.47573	7.54689	7.75489	6.93074	12.3	21.1	29	36	40	44.4	48	51.8	53.1	55.5	58.9
223/1_m2	200	215	256	178	162	263	160	188	225	140	258	178	297	322	298	274	292	187	177	7.64386	7.74819	8	7.47573	7.33985	8.03892	7.32193	7.55459	7.81378	7.12928	8.01123	7.47573	8.21432	8.33092	8.21917	8.09803	8.18982	7.54689	7.46761	13.3	21.5	29.9	35.4	38.3	41.4	43.3	47.6	49.8	53.9	58
223/1_m3	151	210	213	274	137	155	271	174	232	147	183	344	300	264	294	294	226	210	129	7.2384	7.71425	7.73471	8.09803	7.09803	7.27612	8.08215	7.44294	7.85798	7.19967	7.5157	8.42626	8.22882	8.04439	8.19967	8.19967	7.82018	7.71425	7.01123	12.7	20.1	27.5	31.4	35.7	39.1	39.7	43.3	45.1	48.4	52.8
223/1_m4	144	163	309	158	195	217	161	254	239	157	139	146	147	121	151	175	149	177	131	7.16993	7.34873	8.27146	7.30378	7.60733	7.76155	7.33092	7.98868	7.90087	7.29462	7.11894	7.18982	7.19967	6.91886	7.2384	7.45121	7.21917	7.46761	7.03342	14.2	23.2	30.3	33.9	38	42.3	42.7	45	47.3	52.1	55.1
223/2_m1	145	201	260	299	167	191	161	204	171	168	173	170	253	213	178	145	323	153	148	7.17991	7.65105	8.02237	8.224	7.3837	7.57743	7.33092	7.67243	7.41785	7.39232	7.43463	7.40939	7.98299	7.73471	7.47573	7.17991	8.33539	7.25739	7.20945	12.9	23.1	33.6	39.2	42.8	47.5	49.2	52.5	53.9	57.1	60.9
223/2_m3	129	171	223	225	208	179	166	149	137	208	229	336	287	435	344	305	414	292	104	7.01123	7.41785	7.8009	7.81378	7.70044	7.48382	7.37504	7.21917	7.09803	7.70044	7.8392	8.39232	8.16491	8.76487	8.42626	8.25267	8.69349	8.18982	6.70044	13.2	22.2	31	37.9	40.4	45	45.8	49.9	53.4	58.1	62.3
223/2_m4	135	220	260	212	146	213	141	182	235	153	301	279	384	310	406	293	256	185	95	7.07682	7.78136	8.02237	7.72792	7.18982	7.73471	7.13955	7.50779	7.87652	7.25739	8.23362	8.12412	8.58496	8.27612	8.66534	8.19476	8	7.53138	6.56986	10.6	18.3	27.4	31.5	35.8	39.9	41.1	44.8	46.7	50.9	54.3
224/1_m1	153	189	210	155	173	162	220	236	190	338	245	196	271	242	171	147	159	132	105	7.25739	7.56224	7.71425	7.27612	7.43463	7.33985	7.78136	7.88264	7.56986	8.40088	7.93664	7.61471	8.08215	7.91886	7.41785	7.19967	7.31288	7.04439	6.71425	17.4	26.2	31.5	36.6	42.3	45.7	47.3	50.5	51.6	54.4	57.5
224/1_m2	140	189	205	198	221	369	237	205	394	385	286	258	224	129	110	154	125	171	112	7.12928	7.56224	7.67948	7.62936	7.7879	8.52748	7.88874	7.67948	8.62205	8.58871	8.15987	8.01123	7.80735	7.01123	6.78136	7.26679	6.96578	7.41785	6.80735	15.5	26.2	34.7	37.5	42.6	46.7	48.4	51.4	52.6	54.4	56.5
224/1_m3	123	207	206	161	208	135	138	181	178	147	207	196	222	177	158	129	225	234	152	6.94251	7.69349	7.6865	7.33092	7.70044	7.07682	7.10852	7.49985	7.47573	7.19967	7.69349	7.61471	7.79442	7.46761	7.30378	7.01123	7.81378	7.87036	7.24793	13.8	24.4	31.6	37	39.4	43.2	45.8	49.4	50.9	54.5	57.1
224/1_m4	175	207	262	290	427	470	342	414	441	573	501	553	600	493	571	600	600	600	599	7.45121	7.69349	8.03342	8.17991	8.73809	8.87652	8.41785	8.69349	8.78463	9.16239	8.96867	9.11114	9.22882	8.94544	9.15735	9.22882	9.22882	9.22882	9.22641	16.2	26.5	34.9	41.2	44.3	47.6	48.6	51.6	53	55.5	57.9
225/A1_m1	141	200	202	162	155	146	170	146	141	129	168	215	217	168	294	167	208	159	112	7.13955	7.64386	7.65821	7.33985	7.27612	7.18982	7.40939	7.18982	7.13955	7.01123	7.39232	7.74819	7.76155	7.39232	8.19967	7.3837	7.70044	7.31288	6.80735	15.8	25.6	32.2	36.8	40.2	45.6	47.5	52.1	52.9	56.7	60.2
225/A1_m2	127	172	175	257	162	312	161	170	153	161	143	229	327	175	264	180	150	186	128	6.98868	7.42626	7.45121	8.00562	7.33985	8.2854	7.33092	7.40939	7.25739	7.33092	7.15987	7.8392	8.35315	7.45121	8.04439	7.49185	7.22882	7.53916	7	15.5	24.8	31.5	38	42.5	47.9	50.2	53.6	54.4	57.2	59.7
225/A1_m3	123	184	212	197	205	279	139	156	171	144	154	173	194	159	137	184	165	168	183	6.94251	7.52356	7.72792	7.62205	7.67948	8.12412	7.11894	7.2854	7.41785	7.16993	7.26679	7.43463	7.59991	7.31288	7.09803	7.52356	7.36632	7.39232	7.5157	16.5	27.7	34	39.6	45.2	49.1	49.6	52	53.4	54.6	57.1
225/A1_m4	150	294	245	177	222	308	354	244	245	266	289	217	296	317	319	227	181	170	96	7.22882	8.19967	7.93664	7.46761	7.79442	8.26679	8.46761	7.93074	7.93664	8.05528	8.17493	7.76155	8.20945	8.30834	8.31741	7.82655	7.49985	7.40939	6.58496	15.1	25.1	32.8	38.7	41.5	47	50	52.8	54.3	56.9	59.6
225/B1_m1	146	161	227	246	180	178	197	163	220	255	476	388	386	402	294	209	159	199	132	7.18982	7.33092	7.82655	7.94251	7.49185	7.47573	7.62205	7.34873	7.78136	7.99435	8.89482	8.59991	8.59246	8.65105	8.19967	7.70736	7.31288	7.63662	7.04439	13.9	23.3	29.1	33.3	36	41.6	43	46.5	49.1	52.2	55.4
225/B1_m2	123	174	195	167	260	206	159	167	127	116	359	187	139	113	137	102	115	115	122	6.94251	7.44294	7.60733	7.3837	8.02237	7.6865	7.31288	7.3837	6.98868	6.85798	8.48784	7.54689	7.11894	6.82018	7.09803	6.67243	6.84549	6.84549	6.93074	16.1	25.7	31.8	35	37.5	41.4	41.7	45.4	45.1	48.8	51.6
225/B1_m3	142	149	249	152	139	159	150	127	147	129	122	132	118	131	116	82	104	126	196	7.14975	7.21917	7.96	7.24793	7.11894	7.31288	7.22882	6.98868	7.19967	7.01123	6.93074	7.04439	6.88264	7.03342	6.85798	6.35755	6.70044	6.97728	7.61471	16.4	26.4	34	37.7	40	43.3	45.4	46.8	47.9	50.8	52.7
225/B1_m4	149	141	171	159	192	282	307	398	235	321	449	529	468	491	475	280	188	151	133	7.21917	7.13955	7.41785	7.31288	7.58496	8.13955	8.26209	8.63662	7.87652	8.32643	8.81057	9.04712	8.87036	8.93958	8.89178	8.12928	7.55459	7.2384	7.05528	13.5	22.5	29.6	34.4	38.1	43	45.9	49.1	50.7	54	56.7
227/1_m1	135	153	248	237	174	195	141	174	270	253	328	176	217	158	242	219	232	256	301	7.07682	7.25739	7.9542	7.88874	7.44294	7.60733	7.13955	7.44294	8.07682	7.98299	8.35755	7.45943	7.76155	7.30378	7.91886	7.77479	7.85798	8	8.23362	9.4	18.7	25.7	29.5	33.1	36.3	40	42.8	45.6	47.8	51.1
227/1_m3	119	145	212	197	179	200	159	196	148	154	190	185	147	135	166	130	151	131	133	6.89482	7.17991	7.72792	7.62205	7.48382	7.64386	7.31288	7.61471	7.20945	7.26679	7.56986	7.53138	7.19967	7.07682	7.37504	7.02237	7.2384	7.03342	7.05528	9.6	20.5	29.9	35.7	39.2	40.6	43.6	46.6	48.3	50.9	53.4
227/1_m4	101	198	214	200	196	128	193	152	225	296	169	136	213	172	144	125	180	304	127	6.65821	7.62936	7.74147	7.64386	7.61471	7	7.59246	7.24793	7.81378	8.20945	7.40088	7.08746	7.73471	7.42626	7.16993	6.96578	7.49185	8.24793	6.98868	10.1	21.4	31.1	37.5	42.1	45.4	49.8	53.6	56.1	59.3	62.9
227/1_m5	141	180	178	164	164	181	189	178	194	185	179	179	205	151	136	122	151	125	205	7.13955	7.49185	7.47573	7.35755	7.35755	7.49985	7.56224	7.47573	7.59991	7.53138	7.48382	7.48382	7.67948	7.2384	7.08746	6.93074	7.2384	6.96578	7.67948	11.1	21.1	29.3	34.8	38.4	40.5	44.1	48.6	51.9	56.1	60.1
228/2_m1	143	178	171	164	155	164	180	151	137	206	170	191	165	135	165	166		133	136	7.15987	7.47573	7.41785	7.35755	7.27612	7.35755	7.49185	7.2384	7.09803	7.6865	7.40939	7.57743	7.36632	7.07682	7.36632	7.37504		7.05528	7.08746	11.4	21.4	31.3	37.1	41.8	44.2	47.2	50.5	52.6	55.8	58.9
228/2_m2	96	156	212	208	126	189	181	183	174	187	214	225	506	242	335	388	203	415	211	6.58496	7.2854	7.72792	7.70044	6.97728	7.56224	7.49985	7.5157	7.44294	7.54689	7.74147	7.81378	8.98299	7.91886	8.38802	8.59991	7.66534	8.69697	7.7211	9.7	18.6	27.4	30	33.3	36.3	37.4	39.8	43.3	46.9	49.8
228/2_m3	96	144	208	146	238	261	165	161	165	280	257	295	259	228	266	345	372	282	200	6.58496	7.16993	7.70044	7.18982	7.89482	8.02791	7.36632	7.33092	7.36632	8.12928	8.00562	8.20457	8.01681	7.83289	8.05528	8.43045	8.53916	8.13955	7.64386	10.1	19.8	29.1	34.7	39.6	42.2	45.5	49.3	51.8	55.5	58.7
228/2_m4	116	151	186	184	245	209	225	229	148	229	273	173	328	297	220	335	478	533	396	6.85798	7.2384	7.53916	7.52356	7.93664	7.70736	7.81378	7.8392	7.20945	7.8392	8.09276	7.43463	8.35755	8.21432	7.78136	8.38802	8.90087	9.05799	8.62936	10.6	21.1	32.1	38.1	43.7	45.4	48.2	52	54	57.3	60.6
228/2_m5	121	219	250	344	146	145	199	212	196	282	370	405	244	474	336	286	328	408	355	6.91886	7.77479	7.96578	8.42626	7.18982	7.17991	7.63662	7.72792	7.61471	8.13955	8.53138	8.66178	7.93074	8.88874	8.39232	8.15987	8.35755	8.67243	8.47168	10.1	20.7	31.3	36.5	41.1	44	46.5	49.6	52.4	56.6	60.3
229/A1_m1	119	174	260	158	152	237	226	155	221	210	192	325	282	244	253	187	204	148	123	6.89482	7.44294	8.02237	7.30378	7.24793	7.88874	7.82018	7.27612	7.7879	7.71425	7.58496	8.3443	8.13955	7.93074	7.98299	7.54689	7.67243	7.20945	6.94251	11	21.9	30.5	35.4	39.7	43.7	47.7	51.2	52.5	54.6	57
229/A1_m2	107	152	257	184	250	162	244	174	191	252	262	388	344	312	273	225	381	268	211	6.74147	7.24793	8.00562	7.52356	7.96578	7.33985	7.93074	7.44294	7.57743	7.97728	8.03342	8.59991	8.42626	8.2854	8.09276	7.81378	8.57365	8.06609	7.7211	10.9	22.2	32.3	38.4	43.8	46.1	48.9	53.2	54.9	57.6	59.8
229/A1_m3	96	149	219	166	182	153	168	148	135	143	128	192	217	203	236	176	294	228	129	6.58496	7.21917	7.77479	7.37504	7.50779	7.25739	7.39232	7.20945	7.07682	7.15987	7	7.58496	7.76155	7.66534	7.88264	7.45943	8.19967	7.83289	7.01123	9.8	20.6	29.5	34.9	39.1	40	44	47.3	48.4	51.5	54.7
229/A1_m4	105	147	273	114	204	140	170	192	152	142	180	172	197	182	145	123	171	157	174	6.71425	7.19967	8.09276	6.83289	7.67243	7.12928	7.40939	7.58496	7.24793	7.14975	7.49185	7.42626	7.62205	7.50779	7.17991	6.94251	7.41785	7.29462	7.44294	10.4	21.3	32.5	36.6	39.3	41.6	43.9	48.5	49.7	52.4	54.1
229/B1_m1	116	160	198	163	211	265	218	123	164	235	258	269	312	262	384	218	247	201	135	6.85798	7.32193	7.62936	7.34873	7.7211	8.04985	7.76818	6.94251	7.35755	7.87652	8.01123	8.07146	8.2854	8.03342	8.58496	7.76818	7.94837	7.65105	7.07682	9.9	20.5	29.9	35.5	40.3	42.3	44.3	47.9	50.3	53.8	56
229/B1_m2	121	133	238	172	174	158	191	188	134	147	166	143	174	154	155	131	147	139	183	6.91886	7.05528	7.89482	7.42626	7.44294	7.30378	7.57743	7.55459	7.06609	7.19967	7.37504	7.15987	7.44294	7.26679	7.27612	7.03342	7.19967	7.11894	7.5157	9.3	19.1	28	32	36.3	37.7	40.5	43	43.9	47.4	48.9
229/B1_m3	144	154	205	171	142	275	222	161	245	196	315	410	452	363	443	398	372	262	207	7.16993	7.26679	7.67948	7.41785	7.14975	8.10329	7.79442	7.33092	7.93664	7.61471	8.29921	8.67948	8.82018	8.50383	8.79116	8.63662	8.53916	8.03342	7.69349	10.7	20.9	30.7	37.1	41.4	43.3	43.8	48.6	52.3	57.5	60.1
227/2_m1	85	168	203	291	183	251	215	173	178	241	263		311	397	338	217	278	265	226	6.40939	7.39232	7.66534	8.18488	7.5157	7.97154	7.74819	7.43463	7.47573	7.91289	8.03892		8.28077	8.633	8.40088	7.76155	8.11894	8.04985	7.82018	11.4	23.1	34.6	41.4	44.7	47.9	52.3	54.9	57.4	60.4	64.3
227/2_m2	104	181	267	235	164	210	170	147	212	167	144		169	173	145	146	165	134	160	6.70044	7.49985	8.0607	7.87652	7.35755	7.71425	7.40939	7.19967	7.72792	7.3837	7.16993		7.40088	7.43463	7.17991	7.18982	7.36632	7.06609	7.32193	12.2	26.5	35	37.6	41.5	44.7	47	48.4	49.9	52.2	55.7
227/2_m3	127	219	211	211	195	254	256	206	79	263	259		417	464	416	286	490	341	600	6.98868	7.77479	7.7211	7.7211	7.60733	7.98868	8	7.6865	6.30378	8.03892	8.01681		8.7039	8.85798	8.70044	8.15987	8.93664	8.41363	9.22882	11	22	30.5	34.7	39.4	42.9	47.4	51.1	54.5	56	60
221/3A_m1	206	198	245	166	150	175	143	148	150	183	186	202	182	258	202	192	172	304	112	7.6865	7.62936	7.93664	7.37504	7.22882	7.45121	7.15987	7.20945	7.22882	7.5157	7.53916	7.65821	7.50779	8.01123	7.65821	7.58496	7.42626	8.24793	6.80735	20.2	30.3	37.1	42.3	43.1	45.9	48.1	49.7	51.7	54.7	57.3
221/3A_m2	193	216	206	160	164	158	111	187	192	131	158	207	161	162	139	145	146	148	97	7.59246	7.75489	7.6865	7.32193	7.35755	7.30378	6.79442	7.54689	7.58496	7.03342	7.30378	7.69349	7.33092	7.33985	7.11894	7.17991	7.18982	7.20945	6.59991	17.3	27.9	35.2	38.8	39.7	42.3	43.6	45.9	49.1	50.6	53
221/3A_m3	176	205	397	175	140	210	153	201	205	332	367	267	244	325	251	298	310	425	175	7.45943	7.67948	8.633	7.45121	7.12928	7.71425	7.25739	7.65105	7.67948	8.37504	8.51964	8.0607	7.93074	8.3443	7.97154	8.21917	8.27612	8.73132	7.45121	17.8	29	36.6	42.7	44.9	44.8	50.3	51.4	54	56.1	59.6
221/3A_m4	178	162	426	154	137	190	159	134	201	274	484	498	512	485	461	480	506	551	404	7.47573	7.33985	8.73471	7.26679	7.09803	7.56986	7.31288	7.06609	7.65105	8.09803	8.91886	8.96	9	8.92184	8.84862	8.90689	8.98299	9.10591	8.65821	18.3	28.3	34.1	39.8	41.9	44.3	48.3	51.1	54	56.8	62.3
221/3_B_m1	169	224	228	193	157	167	139	176	168	177	191	207	262	162	175	173	223	203	150	7.40088	7.80735	7.83289	7.59246	7.29462	7.3837	7.11894	7.45943	7.39232	7.46761	7.57743	7.69349	8.03342	7.33985	7.45121	7.43463	7.8009	7.66534	7.22882	15.1	25	32.4	37.3	39.3	43.5	44.2	47.8	48.5	52.4	54.7
221/3_B_m2	195	249	317	282	175	161	171	163	151	228	148	169	123	124	154	205	160	141	139	7.60733	7.96	8.30834	8.13955	7.45121	7.33092	7.41785	7.34873	7.2384	7.83289	7.20945	7.40088	6.94251	6.9542	7.26679	7.67948	7.32193	7.13955	7.11894	15	24.3	30.6	35.1	37	39.7	36.4	38.5	39.5	40.1	43.7
221/3_B_m3	211	231	234	245	135	153	185	165	195	204	216	198	429	276	178	289	274	247	175	7.7211	7.85175	7.87036	7.93664	7.07682	7.25739	7.53138	7.36632	7.60733	7.67243	7.75489	7.62936	8.74483	8.10852	7.47573	8.17493	8.09803	7.94837	7.45121	14.8	24.4	32	36.9	38.7	42.6	40.2	46.1	47.4	51.4	43.5
223/3_m1	196	187	365	224	454	336	415	432	257	399	271	332	268	224	202	302	238	363	182	7.61471	7.54689	8.51175	7.80735	8.82655	8.39232	8.69697	8.75489	8.00562	8.64024	8.08215	8.37504	8.06609	7.80735	7.65821	8.2384	7.89482	8.50383	7.50779	19.5	32.7	41.1	44.2	49.2	51.5	53.2	55.5	57.6	61.2	65.2
223/3_m2	211	219	240	253	244	262	184	302	250	370	383	307	466	363	388	350	356	331	144	7.7211	7.77479	7.90689	7.98299	7.93074	8.03342	7.52356	8.2384	7.96578	8.53138	8.5812	8.26209	8.86419	8.50383	8.59991	8.45121	8.47573	8.37069	7.16993	19.4	30.2	38.7	43.4	48.1	51.7	54.4	57.8	59.3	63	66.5
223/3_m3	179	209	173	177	209	165	199	170	170	225	156	226	163	203	190	171	207	149	143	7.48382	7.70736	7.43463	7.46761	7.70736	7.36632	7.63662	7.40939	7.40939	7.81378	7.2854	7.82018	7.34873	7.66534	7.56986	7.41785	7.69349	7.21917	7.15987	17	27	33.1	36.4	41.3	44	44.6	47.9	50.1	53.5	56.9
227/3_m1	207	231	275	247	188	233	248	232	178	224	218	211	249	197	257	358	301	241	105	7.69349	7.85175	8.10329	7.94837	7.55459	7.86419	7.9542	7.85798	7.47573	7.80735	7.76818	7.7211	7.96	7.62205	8.00562	8.48382	8.23362	7.91289	6.71425	17.8	29.4	37.2	43.5	47.7	51.8	55.2	58.9	57.2	59.1	62.1
227/3_m2	156	212	217	275	197	201	190	169	131	166	178	168	212	265	236	223	225	207	134	7.2854	7.72792	7.76155	8.10329	7.62205	7.65105	7.56986	7.40088	7.03342	7.37504	7.47573	7.39232	7.72792	8.04985	7.88264	7.8009	7.81378	7.69349	7.06609	17.2	28.4	37.3	44.1	49.6	54.3	57.4	60.7	63.2	65.4	67.5
227/3_m3	193	313	355	256	326	208	275	437	320	504	565	494	498	486	483	554	473	417	187	7.59246	8.29002	8.47168	8	8.34873	7.70044	8.10329	8.77149	8.32193	8.97728	9.14211	8.94837	8.96	8.92481	8.91588	9.11374	8.8857	8.7039	7.54689	20.8	29.2	33.7	40.3	44.6	47.6	49.3	53.3	53.6	56.1	58.8
215/3_m1	107	147	185	197	153	145	158	174	147	194	229	153	222	214	295	256	434	417	175	6.74147	7.19967	7.53138	7.62205	7.25739	7.17991	7.30378	7.44294	7.19967	7.59991	7.8392	7.25739	7.79442	7.74147	8.20457	8	8.76155	8.7039	7.45121	12	21.9	29.4	32.7	33.9	35.9	35.2	38.1	40.5	44.7	49.9
215/3_m2	192	180	223	273	225	142	134	225	196	275	365	186	206	325	351	336	410	312	168	7.58496	7.49185	7.8009	8.09276	7.81378	7.14975	7.06609	7.81378	7.61471	8.10329	8.51175	7.53916	7.6865	8.3443	8.45533	8.39232	8.67948	8.2854	7.39232	10.3	19.3	29.2	35.6	36.9	39.7	37.8	41.3	44	47	50.5
207/2_m1	134	235	213	335	119	187	163	158	172	171	208	163	212	336	179	258	233	164	113	7.06609	7.87652	7.73471	8.38802	6.89482	7.54689	7.34873	7.30378	7.42626	7.41785	7.70044	7.34873	7.72792	8.39232	7.48382	8.01123	7.86419	7.35755	6.82018	14.1	24.1	33.4	37.1	41.7	44.8	48	52.5	56.3	59.8	62.1
207/2_m2	96	181	192	151	101	147	222	258	279	274	276	452	448	375	362	371	258	296	171	6.58496	7.49985	7.58496	7.2384	6.65821	7.19967	7.79442	8.01123	8.12412	8.09803	8.10852	8.82018	8.80735	8.55075	8.49985	8.53528	8.01123	8.20945	7.41785	11	20.7	32.2	37.3	41.7	45.6	49.5	54	58.2	61.9	64.9
207/2_m3	102	187	195	257	165	178	185	313	297	220	196	141	233	304	163	214	209	227	200	6.67243	7.54689	7.60733	8.00562	7.36632	7.47573	7.53138	8.29002	8.21432	7.78136	7.61471	7.13955	7.86419	8.24793	7.34873	7.74147	7.70736	7.82655	7.64386	8.1	16.8	27.4	36.9	43.4	47.1	50.4	54.7	59.5	62.7	65.4
207/2_m4	115	189	191	301	128	136	115	129	345	171	199	144	203	219	154	263	130	159	207	6.84549	7.56224	7.57743	8.23362	7	7.08746	6.84549	7.01123	8.43045	7.41785	7.63662	7.16993	7.66534	7.77479	7.26679	8.03892	7.02237	7.31288	7.69349	11.7	20.4	30.3	35.5	38.6	38.5	40.6	46.3	50.4	50.9	53.6
207/2_m5	101	224	183	223	114	174	207	137	209	176	218	230	209	226	167	241	176	149	142	6.65821	7.80735	7.5157	7.8009	6.83289	7.44294	7.69349	7.09803	7.70736	7.45943	7.76818	7.84549	7.70736	7.82018	7.3837	7.91289	7.45943	7.21917	7.14975	14.3	24.8	33.3	37.3	39.8	42.1	46	52.5	57.2	61.7	65.2
209/2A_m1	135	206	212	214	242	223	209	140	169	145	152	189	170	173	168	148	201	141	145	7.07682	7.6865	7.72792	7.74147	7.91886	7.8009	7.70736	7.12928	7.40088	7.17991	7.24793	7.56224	7.40939	7.43463	7.39232	7.20945	7.65105	7.13955	7.17991	8.4	16.9	27	31.7	37.4	41.5	42.4	44.3	46	46.8	49.1
209/2A_m4	132	193	279	200	195	164	136	137	149	162	164	260	239	353	369	209	253	226	120	7.04439	7.59246	8.12412	7.64386	7.60733	7.35755	7.08746	7.09803	7.21917	7.33985	7.35755	8.02237	7.90087	8.46352	8.52748	7.70736	7.98299	7.82018	6.90689	12.1	21.9	31	34.7	38.4	41.1	41.2	45.3	47	50	52.1
209/2_B_m1	154	193	200	263	288	469	409	366	408	272	348	198	283	357	371	443	312	407	269	7.26679	7.59246	7.64386	8.03892	8.16993	8.87344	8.67596	8.5157	8.67243	8.08746	8.44294	7.62936	8.14466	8.47978	8.53528	8.79116	8.2854	8.66888	8.07146	8.7	18.9	23.3	36.4	42.3	47	50	52.7	56	58.7	61
209/2_B_m2	85	245	207	233	284	205	192	228	344	198	232	177	231	423	274	282	173	388	224	6.40939	7.93664	7.69349	7.86419	8.14975	7.67948	7.58496	7.83289	8.42626	7.62936	7.85798	7.46761	7.85175	8.72451	8.09803	8.13955	7.43463	8.59991	7.80735	7.2	16.9	29	38.2	44.4	47.5	49.5	54.3	57.4	60.3	63.4
209/2_B_m3	159	253	232	227	164	210	154	199	192	146	232	145	182	232	194	263	163	180	112	7.31288	7.98299	7.85798	7.82655	7.35755	7.71425	7.26679	7.63662	7.58496	7.18982	7.85798	7.17991	7.50779	7.85798	7.59991	8.03892	7.34873	7.49185	6.80735	12.7	24.4	33	37.8	43.5	47.2	49	52.6	54.9	57.6	60.3
209/2_B_m4	124	218	241	241	193	185	141	133	172	227	246	217	237	327	228	338	233	329	130	6.9542	7.76818	7.91289	7.91289	7.59246	7.53138	7.13955	7.05528	7.42626	7.82655	7.94251	7.76155	7.88874	8.35315	7.83289	8.40088	7.86419	8.36194	7.02237	9.1	18.3	28	33.6	37.8	41.9	42.5	46.6	51	54.6	57.4
210/2_m1	133	200	192	211		282	246	276	417	247	411	394	457	475	381	484	376	370	242	7.05528	7.64386	7.58496	7.7211		8.13955	7.94251	8.10852	8.7039	7.94837	8.68299	8.62205	8.83605	8.89178	8.57365	8.91886	8.55459	8.53138	7.91886	12.5	23.5	34.3	40.2		48.5	51.1	56.1	60.1	61.5	63.9
210/2_m2	129	208	180	247		162	156	126	164	153	200	166	130	176	129	190	119	132	103	7.01123	7.70044	7.49185	7.94837		7.33985	7.2854	6.97728	7.35755	7.25739	7.64386	7.37504	7.02237	7.45943	7.01123	7.56986	6.89482	7.04439	6.6865	12.6	23.1	33.2	37		43.2	44.8	47.9	50	52.1	53.1
210/2_m3	139	185	175	181		140	164	113	137	149	151	157	170	215	161	120	144	148	181	7.11894	7.53138	7.45121	7.49985		7.12928	7.35755	6.82018	7.09803	7.21917	7.2384	7.29462	7.40939	7.74819	7.33092	6.90689	7.16993	7.20945	7.49985	12.8	23.1	30.1	32.5		38.4	39.1	42.5	43.2	43.9	46
208/2A_m1	148	209	182	220	173	185	185	175	151	131	139	147	151	156	139	143	135	133	111	7.20945	7.70736	7.50779	7.78136	7.43463	7.53138	7.53138	7.45121	7.2384	7.03342	7.11894	7.19967	7.2384	7.2854	7.11894	7.15987	7.07682	7.05528	6.79442	18	29.2	34.9	41.2	41.9	43.5	44.3	43.3	46.6	46	49.1
208/2A_m2	219	242	176	247	134	335	222	200	238	214	333	227	190	193	220	148	212	223	136	7.77479	7.91886	7.45943	7.94837	7.06609	8.38802	7.79442	7.64386	7.89482	7.74147	8.37938	7.82655	7.56986	7.59246	7.78136	7.20945	7.72792	7.8009	7.08746	17.6	29.7	36.1	43	46.6	51.4	51.1	51.8	56.1	57.4	60.5
208/2A_m3	165	215	188	201	132	188	177	186	118	173	277	131	275	374	233	318	267	313	154	7.36632	7.74819	7.55459	7.65105	7.04439	7.55459	7.46761	7.53916	6.88264	7.43463	8.11374	7.03342	8.10329	8.54689	7.86419	8.31288	8.0607	8.29002	7.26679	15.7	26.4	33.9	40.1	42.8	46.4	46.8	49.5	50.8	52.7	55.5
208/2A_m4	170	336	227	277	167	176	305	284	220	169	284	198	149	237	295	269	198	188	148	7.40939	8.39232	7.82655	8.11374	7.3837	7.45943	8.25267	8.14975	7.78136	7.40088	8.14975	7.62936	7.21917	7.88874	8.20457	8.07146	7.62936	7.55459	7.20945	15.5	25.4	32.5	38	41.1	45	46.7	49.7	53.1	55.6	58.9
208/2_B_m2	152	213	193	190	144	152	139	159	153	124	109	98	93		86	81	92	96	67	7.24793	7.73471	7.59246	7.56986	7.16993	7.24793	7.11894	7.31288	7.25739	6.9542	6.76818	6.61471	6.53916		6.42626	6.33985	6.52356	6.58496	6.06609	17.2	28.6	37.8	42	43.9	47.4	47.5	48.9	51.2	50.5	49.1
226/2_m1	125	243	223	265	230	203	229	252	208	191	238	211	307	288	301	170	330	185	142	6.96578	7.92481	7.8009	8.04985	7.84549	7.66534	7.8392	7.97728	7.70044	7.57743	7.89482	7.7211	8.26209	8.16993	8.23362	7.40939	8.36632	7.53138	7.14975	11.2	22.5	32.7	39.4	43.5	47.7	51.4	56.6	57.4	60.8	64.1
226/2_m2	144	245	218	280	316	221	262	201	234	191	270	177	277	206	189	232	253	160	172	7.16993	7.93664	7.76818	8.12928	8.30378	7.7879	8.03342	7.65105	7.87036	7.57743	8.07682	7.46761	8.11374	7.6865	7.56224	7.85798	7.98299	7.32193	7.42626	10.9	21.2	31.4	35.7	38.3	40.8	41.1	46.1	46.4	49	50.9
226/2_m4	137	201	177	273	238	218	320	328	154	306	303	380	159	282	91	238	147	183	181	7.09803	7.65105	7.46761	8.09276	7.89482	7.76818	8.32193	8.35755	7.26679	8.25739	8.24317	8.56986	7.31288	8.13955	6.50779	7.89482	7.19967	7.5157	7.49985	11	22	33	37.5	38.1	41.2	45.7	51.1	51	54.8	57.2
223/4_m4	171	229	378	166	276	295	383	299	273	188	236	280	160	270	258	263	274	192	188	7.41785	7.8392	8.56224	7.37504	8.10852	8.20457	8.5812	8.224	8.09276	7.55459	7.88264	8.12928	7.32193	8.07682	8.01123	8.03892	8.09803	7.58496	7.55459	13.1	25.3	35.4	41.5	45.8	50.2	53.2	56.3	59	61.5	64.6
229/2_m1	180	232	206	240	124	277	229	253	428	291	565	431	331	481	397	426	523	403	253	7.49185	7.85798	7.6865	7.90689	6.9542	8.11374	7.8392	7.98299	8.74147	8.18488	9.14211	8.75154	8.37069	8.90989	8.633	8.73471	9.03067	8.65464	7.98299	11.1	20.2	31.6	37.5	40	45.3	48.3	51.6	54.5	56.9	59.8
229/2_m4	200	236	174	213	114	144	173	176	287	186	281	418	507	404	251	366	355	287	217	7.64386	7.88264	7.44294	7.73471	6.83289	7.16993	7.43463	7.45943	8.16491	7.53916	8.13443	8.70736	8.98584	8.65821	7.97154	8.5157	8.47168	8.16491	7.76155	12	22.2	29.3	37.2	38.4	44.1	44.1	50	54	56.4	59.9
229/2_m5	177	202	199	172	168	148	234	182	199	216	203	233	242	186	200	247	247	162	209	7.46761	7.65821	7.63662	7.42626	7.39232	7.20945	7.87036	7.50779	7.63662	7.75489	7.66534	7.86419	7.91886	7.53916	7.64386	7.94837	7.94837	7.33985	7.70736	9.9	19.9	30.2	36.5	39.2	45.2	46.8	50	53.3	54.9	54.1
229/2_m6	230	225	165	172	137	170	146	158	152	136	194	146	190	208	153	233	327	136	131	7.84549	7.81378	7.36632	7.42626	7.09803	7.40939	7.18982	7.30378	7.24793	7.08746	7.59991	7.18982	7.56986	7.70044	7.25739	7.86419	8.35315	7.08746	7.03342	11.1	21.1	29.1	32	32.3	36.8	37.8	42.1	45.6	47.7	51.3
214/2_m1	160		214	176	230	216	180	290	149	165	172	268	200	194	332	216	167	181	138	7.32193		7.74147	7.45943	7.84549	7.75489	7.49185	8.17991	7.21917	7.36632	7.42626	8.06609	7.64386	7.59991	8.37504	7.75489	7.3837	7.49985	7.10852	13.8		36.4	40.5	43.6	48.1	51.2	54.2	55.9	58.3	61.3
214/2_m2	159		230	242	186	232	205	174	139	167	245	480	329	225	230	200	220	326	84	7.31288		7.84549	7.91886	7.53916	7.85798	7.67948	7.44294	7.11894	7.3837	7.93664	8.90689	8.36194	7.81378	7.84549	7.64386	7.78136	8.34873	6.39232	12.4		36.7	42.6	46.1	49.1	51.6	53.8	57.1	59.3	64.6
225/2_m1	160		163	152	162	155	130	218	304	348	296	434	336	315	255	238	187	201	249	7.32193		7.34873	7.24793	7.33985	7.27612	7.02237	7.76818	8.24793	8.44294	8.20945	8.76155	8.39232	8.29921	7.99435	7.89482	7.54689	7.65105	7.96	11.6		32.6	31.9	39.2	44.6	46.7	50.4	52.7	56.4	59.4
225/2_m2	162		175	158	202	322	210	228	429	495	424	429	423	478	318	347	328	224	272	7.33985		7.45121	7.30378	7.65821	8.33092	7.71425	7.83289	8.74483	8.95128	8.72792	8.74483	8.72451	8.90087	8.31288	8.43879	8.35755	7.80735	8.08746	13.1		35.3	38.7	42.9	47.2	50.5	54.8	57.2	60.8	63.5
225/2_m3	155		225	180	262	305	146	155	173	296	294	345	319	279	262	260	196	236	297	7.27612		7.81378	7.49185	8.03342	8.25267	7.18982	7.27612	7.43463	8.20945	8.19967	8.43045	8.31741	8.12412	8.03342	8.02237	7.61471	7.88264	8.21432	11.5		33.1	39.1	43.4	47.8	49.6	52.6	54.1	56.7	59.9
225/2_m4	159		132	175	250	182	134	173	258	356	369	365	390	395	327	339	196	176	217	7.31288		7.04439	7.45121	7.96578	7.50779	7.06609	7.43463	8.01123	8.47573	8.52748	8.51175	8.60733	8.62571	8.35315	8.40514	7.61471	7.45943	7.76155	11.3		29.9	31.9	37.3	41.9	45.9	50.7	53.2	56.1	59.7
226/3_m1	155	192	205	220	179	209	148	153	138	247	139	207	227	212	247	347	240		165	7.27612	7.58496	7.67948	7.78136	7.48382	7.70736	7.20945	7.25739	7.10852	7.94837	7.11894	7.69349	7.82655	7.72792	7.94837	8.43879	7.90689		7.36632	11.8	24	29.1	33.8	37	41.8	44.5	48.4	49.3	51.5	54.2
226/3_m2	149	200	212	306	252	175	163	166	167	146	148	200	137	209	140	120	144		134	7.21917	7.64386	7.72792	8.25739	7.97728	7.45121	7.34873	7.37504	7.3837	7.18982	7.20945	7.64386	7.09803	7.70736	7.12928	6.90689	7.16993		7.06609	12.7	24	29.5	35.4	37.8	41.1	42.8	44.5	45.4	46.3	47.4
226/3_m3	119	224	292	364	208	216	168	144	377	248	278	452	431	427	418	465	411		355	6.89482	7.80735	8.18982	8.50779	7.70044	7.75489	7.39232	7.16993	8.55842	7.9542	8.11894	8.82018	8.75154	8.73809	8.70736	8.86109	8.68299		8.47168	11.2	24.1	29.6	33.5	37.3	43.3	44.2	47.5	50.6	51.8	54
229/3_m1	165	193	214	387	184	184	167	185	202	205	247	287	224	286	335	333	326	307	386	7.36632	7.59246	7.74147	8.59619	7.52356	7.52356	7.3837	7.53138	7.65821	7.67948	7.94837	8.16491	7.80735	8.15987	8.38802	8.37938	8.34873	8.26209	8.59246	15.8	26.7	36.1	40.4	44.7	46.5	49.6	54.5	58.5	62.6	65.1
229/3_m2	162	211	291	544	183	159	128	302	289	173	405	228	202	267	310	281	227	191	84	7.33985	7.7211	8.18488	9.08746	7.5157	7.31288	7	8.2384	8.17493	7.43463	8.66178	7.83289	7.65821	8.0607	8.27612	8.13443	7.82655	7.57743	6.39232	13.5	23.8	32.3	36.3	40.1	41.5	44.9	48.5	52.5	55.7	58.3
229/3_m3	167	186	175	205	185	156	148	273	349	268	383	360	240	304	247	264	213	211	165	7.3837	7.53916	7.45121	7.67948	7.53138	7.2854	7.20945	8.09276	8.44708	8.06609	8.5812	8.49185	7.90689	8.24793	7.94837	8.04439	7.73471	7.7211	7.36632	14.4	26.5	34.9	40.5	44.9	45.8	49.3	53.7	58.3	62.7	65.3
229/3_m4	190	213	194	317	168	154	128	218	208	189	329	326	283	261	261	228	263	245	243	7.56986	7.73471	7.59991	8.30834	7.39232	7.26679	7	7.76818	7.70044	7.56224	8.36194	8.34873	8.14466	8.02791	8.02791	7.83289	8.03892	7.93664	7.92481	16.2	27.7	36	38.7	41.1	41.2	44.2	49.1	53.5	57	60
229/3_m5	148	186	203	225	131	125	145	202	199	189	270	320	235	253	363	309	239	255	338	7.20945	7.53916	7.66534	7.81378	7.03342	6.96578	7.17991	7.65821	7.63662	7.56224	8.07682	8.32193	7.87652	7.98299	8.50383	8.27146	7.90087	7.99435	8.40088	15	27.5	37.7	42.8	44.7	44.9	48.8	51.2	54.7	59.2	61.5
225/3_m2	170	233	210	181	258	226	252	247	270	431	361	460	286	337	445	419	249	255	257	7.40939	7.86419	7.71425	7.49985	8.01123	7.82018	7.97728	7.94837	8.07682	8.75154	8.49586	8.84549	8.15987	8.3966	8.79766	8.71081	7.96	7.99435	8.00562	15.3	26.8	33.8	39	42.1	47.5	49.3	53.9	56.1	60.1	63.7
225/3_m3	164	215	316	242	245	348	285	180	271	215	159	164	184	221	183	154	130	221	132	7.35755	7.74819	8.30378	7.91886	7.93664	8.44294	8.15482	7.49185	8.08215	7.74819	7.31288	7.35755	7.52356	7.7879	7.5157	7.26679	7.02237	7.7879	7.04439	14.7	25.3	32.8	38.5	41.2	44.3	44.5	48.6	50.4	53.3	54.8
225/3_m4	160	274	234	315	245	211	306	298	219	388	411	477	347	365	328	528	301	233	320	7.32193	8.09803	7.87036	8.29921	7.93664	7.7211	8.25739	8.21917	7.77479	8.59991	8.68299	8.89785	8.43879	8.51175	8.35755	9.04439	8.23362	7.86419	8.32193	10.3	22.7	30.8	35.9	40.1	44.3	45.2	49.9	52.2	57	60.8
225/3_m5	164	248	236	178	148	262	218	347	264	169	294	303	272	247	272	351	218	345	264	7.35755	7.9542	7.88264	7.47573	7.20945	8.03342	7.76818	8.43879	8.04439	7.40088	8.19967	8.24317	8.08746	7.94837	8.08746	8.45533	7.76818	8.43045	8.04439	13.8	25.7	34.6	38.7	41.8	44.6	46.1	49.7	50.7	52.8	56.6
214/3_m2	176	225	201	174	187	179	271	141	185	197	208	144	208	178	198	217	155	160	139	7.45943	7.81378	7.65105	7.44294	7.54689	7.48382	8.08215	7.13955	7.53138	7.62205	7.70044	7.16993	7.70044	7.47573	7.62936	7.76155	7.27612	7.32193	7.11894	14.7	26.4	30.8	34.4	36	38.1	38.1	39.2	40.9	45.8	47.6
214/3_m3	240	209	273	218	185	195	299	189	217	248	318	459	375	438	592	539	454	285	136	7.90689	7.70736	8.09276	7.76818	7.53138	7.60733	8.224	7.56224	7.76155	7.9542	8.31288	8.84235	8.55075	8.77479	9.20945	9.07414	8.82655	8.15482	7.08746	14.1	27.1	36.2	40.8	44.2	46	46.2	48.8	49.8	54.7	57.2
206/2_m1	117	210	205	210	238	180	188	178	190	263	253	138	211	397	275	364	442	175	133	6.87036	7.71425	7.67948	7.71425	7.89482	7.49185	7.55459	7.47573	7.56986	8.03892	7.98299	7.10852	7.7211	8.633	8.10329	8.50779	8.7879	7.45121	7.05528	12.8	23.5	35.4	42.4	44.8	47.7	51.6	57.4	60.2	62.5	65.4
206/2_m2	150	188	234	337	203	248	166	174	191	220	206	168	176	185	184	194	164	164	185	7.22882	7.55459	7.87036	8.3966	7.66534	7.9542	7.37504	7.44294	7.57743	7.78136	7.6865	7.39232	7.45943	7.53138	7.52356	7.59991	7.35755	7.35755	7.53138	11.4	19.9	30.7	36.8	39.2	43	46.1	51.3	53	55.5	57.5
206/2_m3	111	167	168	230	205	212	198	201	217	267	249	160	279	280	268	253	209	270	153	6.79442	7.3837	7.39232	7.84549	7.67948	7.72792	7.62936	7.65105	7.76155	8.0607	7.96	7.32193	8.12412	8.12928	8.06609	7.98299	7.70736	8.07682	7.25739	12.2	21.7	32.5	39.8	44.1	46.5	51	55.4	57.8	61	63.1
213/2_m1	160	238	331	294	183	193	176	228	332	158	160	180	248	172	229	219	212	206	201	7.32193	7.89482	8.37069	8.19967	7.5157	7.59246	7.45943	7.83289	8.37504	7.30378	7.32193	7.49185	7.9542	7.42626	7.8392	7.77479	7.72792	7.6865	7.65105	9.5	17.8	27.3	32.7	36.1	38.1	42.8	45.6	49.3	51.4	52.8
213/2_m2	194	239	204	230	186	187	170	180	172	207	210	181	169	139	213	155	138	278	131	7.59991	7.90087	7.67243	7.84549	7.53916	7.54689	7.40939	7.49185	7.42626	7.69349	7.71425	7.49985	7.40088	7.11894	7.73471	7.27612	7.10852	8.11894	7.03342	9	17.3	27.2	33.2	37.5	41.4	45.8	48.7	50.9	53.4	55.1
213/2_m3	132	189	162	202	195	191	166	160	208	182	196	167	180	162	129	136	148	206	146	7.04439	7.56224	7.33985	7.65821	7.60733	7.57743	7.37504	7.32193	7.70044	7.50779	7.61471	7.3837	7.49185	7.33985	7.01123	7.08746	7.20945	7.6865	7.18982	9.7	18.2	28	33.1	36.6	38.8	42	43.9	48.4	48.7	49.5
213/2_m4	170	236	216	221	173	191	166	153	172	171	151	159	152	133	190	124	172	148	138	7.40939	7.88264	7.75489	7.7879	7.43463	7.57743	7.37504	7.25739	7.42626	7.41785	7.2384	7.31288	7.24793	7.05528	7.56986	6.9542	7.42626	7.20945	7.10852	7.8	16.7	26.2	33.9	38.3	40.6	44	46.9	49.3	51.6	53.6
213/2_m5	150	170	237	197	155	195	163	164	191	231	149	167	149	137	151	162	208	209	143	7.22882	7.40939	7.88874	7.62205	7.27612	7.60733	7.34873	7.35755	7.57743	7.85175	7.21917	7.3837	7.21917	7.09803	7.2384	7.33985	7.70044	7.70736	7.15987	9.3	18.5	28.8	35.5	39.9	41.2	45.2	47.2	50.5	52.9	54.4
213/2_m6	123	260	197	177	182	158	204	259	238	215	193	156	139	126	117	138	99	117	136	6.94251	8.02237	7.62205	7.46761	7.50779	7.30378	7.67243	8.01681	7.89482	7.74819	7.59246	7.2854	7.11894	6.97728	6.87036	7.10852	6.62936	6.87036	7.08746	8.9	18.5	30.1	35.3	38.3	40.6	44.3	46.9	49.1	51.8	52.4
211/2_m1	136	198	220	253	190	199	235	239	406	321	192	380	292	337	288	244	350	436	170	7.08746	7.62936	7.78136	7.98299	7.56986	7.63662	7.87652	7.90087	8.66534	8.32643	7.58496	8.56986	8.18982	8.3966	8.16993	7.93074	8.45121	8.76818	7.40939	9.2	18.8	28.3	35.4	42	44.2	49.5	54	57.8	62.3	63.5
211/2_m2	148	201	271	181	148	165	248	232	201	222	170	268	199	231	215	205	200	285	185	7.20945	7.65105	8.08215	7.49985	7.20945	7.36632	7.9542	7.85798	7.65105	7.79442	7.40939	8.06609	7.63662	7.85175	7.74819	7.67948	7.64386	8.15482	7.53138	10.8	21.1	31	35.9	39.7	41.5	46.9	52.4	55.3	58.9	60.9
211/2_m3	130	192	294	207	194	181	170	197	263	299	289	386	389		160	136	94	170	137	7.02237	7.58496	8.19967	7.69349	7.59991	7.49985	7.40939	7.62205	8.03892	8.224	8.17493	8.59246	8.60363		7.32193	7.08746	6.55459	7.40939	7.09803	10.2	20	30.6	37.2	41.8	43.9	49.3	52.9	56.2	60.3	63
211/2_m4	115	217	367	216	289	211	192	200	300	264	241	275	226	250	191	284	165	82	134	6.84549	7.76155	8.51964	7.75489	8.17493	7.7211	7.58496	7.64386	8.22882	8.04439	7.91289	8.10329	7.82018	7.96578	7.57743	8.14975	7.36632	6.35755	7.06609	10	19.2	29	34.2	37	39	45.4	49.3	52.2	55.8	59.1
213/3_m1	157	195	304	254	213	321	174	307	178	257	339	284	269	158	229	252	185	344	110	7.29462	7.60733	8.24793	7.98868	7.73471	8.32643	7.44294	8.26209	7.47573	8.00562	8.40514	8.14975	8.07146	7.30378	7.8392	7.97728	7.53138	8.42626	6.78136	11.6	19.2	30.8	39.7	44.1	47.9	49.1	52.6	55	57.2	61.8
213/3_m2	104	231	222	236	103	163	188	169	153	205	226	234	196	159	164	198	238	352	139	6.70044	7.85175	7.79442	7.88264	6.6865	7.34873	7.55459	7.40088	7.25739	7.67948	7.82018	7.87036	7.61471	7.31288	7.35755	7.62936	7.89482	8.45943	7.11894	11.9	22.3	32.6	35.8	36.1	38.4	42.9	47.3	51.4	54.2	56.7
213/3_m3	160	199	255	184	191	174	224	155	148	148	157	169	154	130	147	170	175	189	138	7.32193	7.63662	7.99435	7.52356	7.57743	7.44294	7.80735	7.27612	7.20945	7.20945	7.29462	7.40088	7.26679	7.02237	7.19967	7.40939	7.45121	7.56224	7.10852	12.6	23.1	34	38.9	40.5	43.9	43.7	44.8	48.6	49.8	55.3
211/3_m1	117	216	239	267	232	197	240	276	228	178	201	172	212	202	162	161	173	391	198	6.87036	7.75489	7.90087	8.0607	7.85798	7.62205	7.90689	8.10852	7.83289	7.47573	7.65105	7.42626	7.72792	7.65821	7.33985	7.33092	7.43463	8.61102	7.62936	10	20.4	30.2	35.8	38.8	40.3	44.1	47	48.2	49.8	51.9
220/2_m2	137	206	200	202	173	128	145	198	149	181	138	128	132	127	117	129	150	132	108	7.09803	7.6865	7.64386	7.65821	7.43463	7	7.17991	7.62936	7.21917	7.49985	7.10852	7	7.04439	6.98868	6.87036	7.01123	7.22882	7.04439	6.75489	17.5	27.4	35.3	38.4	41.8	44.4	46.4	48.6	49.7	51.4	51.5
219/3_m1	115	214	240	253	178	166	156	153	148	162	181	172	150	152	133	204	173	140	157	6.84549	7.74147	7.90689	7.98299	7.47573	7.37504	7.2854	7.25739	7.20945	7.33985	7.49985	7.42626	7.22882	7.24793	7.05528	7.67243	7.43463	7.12928	7.29462	11.7	21.2	31.3	34.2	36.7	38.2	38	40.7	43.6	47.1	49.2
219/3_m2	126	221	224	268	230	195	181	198	139	146	170	152	139	147	176	146	165	148	92	6.97728	7.7879	7.80735	8.06609	7.84549	7.60733	7.49985	7.62936	7.11894	7.18982	7.40939	7.24793	7.11894	7.19967	7.45943	7.18982	7.36632	7.20945	6.52356	10.5	18.9	30.1	35.1	38.3	43.1	46.9	49.3	50.5	51	52.5
219/3_m3	108	270	332	368	235	300	125	159	243	182	367	398	533	537	487	598	470	392	295	6.75489	8.07682	8.37504	8.52356	7.87652	8.22882	6.96578	7.31288	7.92481	7.50779	8.51964	8.63662	9.05799	9.06878	8.92778	9.224	8.87652	8.61471	8.20457	11	20.8	32.3	34.6	38.3	42.4	41.5	45.3	47.9	50.8	55.7
218/2_m1	124	250	266	258	163	189	189	215	197	255	360	373	392	427	453	407	376	284	184	6.9542	7.96578	8.05528	8.01123	7.34873	7.56224	7.56224	7.74819	7.62205	7.99435	8.49185	8.54303	8.61471	8.73809	8.82337	8.66888	8.55459	8.14975	7.52356	10.5	20.2	31.6	33.5	36.7	40.4	43.3	47.1	50.5	54.2	57.2
218/2_m2	98	232	276	309	187	163	138	187	142	198	160	137	187	203	126	214	145	149	302	6.61471	7.85798	8.10852	8.27146	7.54689	7.34873	7.10852	7.54689	7.14975	7.62936	7.32193	7.09803	7.54689	7.66534	6.97728	7.74147	7.17991	7.21917	8.2384	9.4	18.3	30.5	33.3	36.6	40.7	41.3	43.5	46.4	51.4	54.7
218/2_m3	108	230	229	230	186	169	170	231	209	288	373	281	308	371	429	362	305	349	214	6.75489	7.84549	7.8392	7.84549	7.53916	7.40088	7.40939	7.85175	7.70736	8.16993	8.54303	8.13443	8.26679	8.53528	8.74483	8.49985	8.25267	8.44708	7.74147	10.8	19.6	30.9	33.4	38.6	42.9	46.1	50.8	54.6	58.4	61.3
218/2_m4	120	217	233	469	300	449	461	556	531	560	508	496	509	571	591	585	480	498	599	6.90689	7.76155	7.86419	8.87344	8.22882	8.81057	8.84862	9.11894	9.05257	9.12928	8.98868	8.9542	8.99152	9.15735	9.20701	9.19229	8.90689	8.96	9.22641	10.3	18.5	30.9	37.4	43.7	49	51.5	56.3	59.4	62.4	66.1
216/3_m1	134	233	223	286	192	169	186	210	233	160	187	155	238	281	275	365	440	290	108	7.06609	7.86419	7.8009	8.15987	7.58496	7.40088	7.53916	7.71425	7.86419	7.32193	7.54689	7.27612	7.89482	8.13443	8.10329	8.51175	8.78136	8.17991	6.75489	13	19.6	29.1	32.7	37.7	40.4	42.3	44.7	46.3	49.3	51.8
216/3_m2	130	235	271	259	153	185	159	189	126	176	195	138	133	126	125	154	195	235	232	7.02237	7.87652	8.08215	8.01681	7.25739	7.53138	7.31288	7.56224	6.97728	7.45943	7.60733	7.10852	7.05528	6.97728	6.96578	7.26679	7.60733	7.87652	7.85798	11.7	19.4	30	34.9	40.3	43.7	44.4	46.9	49.5	51.6	53.1
219/4_m1	146	214	248	323	174	225	193	282	274	206	294	162	119	188	224	179	203	265	119	7.18982	7.74147	7.9542	8.33539	7.44294	7.81378	7.59246	8.13955	8.09803	7.6865	8.19967	7.33985	6.89482	7.55459	7.80735	7.48382	7.66534	8.04985	6.89482	11.5	21.4	31.6	39.4	44.3	48.5	52.2	55.6	59.1	63.4	67.1
219/4_m2	175	220	279	250	232	276	221	330	396	456	486	487	507	600	600	548	600	586	585	7.45121	7.78136	8.12412	7.96578	7.85798	8.10852	7.7879	8.36632	8.62936	8.83289	8.92481	8.92778	8.98584	9.22882	9.22882	9.09803	9.22882	9.19476	9.19229	12.5	23.1	31.1	37.2	40.7	45.9	49.6	54.1	58.7	62.3	65.6
219/4_m3	156	282	298	255	412	326	371	508	519	520	467	387	494	600	554	535	551	480	557	7.2854	8.13955	8.21917	7.99435	8.6865	8.34873	8.53528	8.98868	9.01959	9.02237	8.86728	8.59619	8.94837	9.22882	9.11374	9.0634	9.10591	8.90689	9.12153	14.4	26.6	34.8	40.7	45.7	50.5	55.3	60.1	63.3	66.6	71.3
219/4_m4	150	200	231	232	187	178	154	152	191	164	175	385	150	377	386	326	438	401	215	7.22882	7.64386	7.85175	7.85798	7.54689	7.47573	7.26679	7.24793	7.57743	7.35755	7.45121	8.58871	7.22882	8.55842	8.59246	8.34873	8.77479	8.64746	7.74819	13.7	25	33.6	40.2	42.5	46.7	46.7	48.3	50.2	53.4	57.9
219/4_m5	140	225	345	177	153	195	228	325	247	353	226	195	111	418	211	176	234	270	145	7.12928	7.81378	8.43045	7.46761	7.25739	7.60733	7.83289	8.3443	7.94837	8.46352	7.82018	7.60733	6.79442	8.70736	7.7211	7.45943	7.87036	8.07682	7.17991	19.6	31.7	36.1	42.7	46.9	50.5	54.1	57.1	59.5	62.8	65.3
219/4_m6	141	195	193	148	131	178	157	206	307	280	204	337	135	349	319	220	312	441	146	7.13955	7.60733	7.59246	7.20945	7.03342	7.47573	7.29462	7.6865	8.26209	8.12928	7.67243	8.3966	7.07682	8.44708	8.31741	7.78136	8.2854	8.78463	7.18982	19.6	29.9	32.4	37.8	40.6	45	46.5	47.7	51.2	52	53.8
224/2_m1	163	221	179	157	116	150	239	147	285	143	200	291	286	169	258	302	365	189	142	7.34873	7.7879	7.48382	7.29462	6.85798	7.22882	7.90087	7.19967	8.15482	7.15987	7.64386	8.18488	8.15987	7.40088	8.01123	8.2384	8.51175	7.56224	7.14975	15.7	27.8	35.9	39.9	45.6	44	48.7	50.2	56.4	58.9	60.3
224/2_m2	148	275	205	206	158	170	331	398	442	448	477	545	540	424	500	600	597	600	504	7.20945	8.10329	7.67948	7.6865	7.30378	7.40939	8.37069	8.63662	8.7879	8.80735	8.89785	9.09011	9.07682	8.72792	8.96578	9.22882	9.22159	9.22882	8.97728	16.6	27.9	35.6	40	45	47	51	53.7	59	62	63.6
224/2_m3	151	283	177	198	134	160	339	403	600	371	425	549	207	134	402	482	542	587	512	7.2384	8.14466	7.46761	7.62936	7.06609	7.32193	8.40514	8.65464	9.22882	8.53528	8.73132	9.10066	7.69349	7.06609	8.65105	8.91289	9.08215	9.19722	9	14.7	25.5	33.6	38	42.8	45.3	49.9	52.3	56.6	56.6	57.3
224/2_m4	172	210	197	216	201	170	233	194	155	165	239	237	196	262	191	276	159	171	149	7.42626	7.71425	7.62205	7.75489	7.65105	7.40939	7.86419	7.59991	7.27612	7.36632	7.90087	7.88874	7.61471	8.03342	7.57743	8.10852	7.31288	7.41785	7.21917	16	26.8	36.6	41.7	46.5	48.9	52.9	54.9	59.2	62.9	65
208/3_m1	121	217	187	359	419	434	384	600	547	455	406	426	436	475	553	451	390	371	297	6.91886	7.76155	7.54689	8.48784	8.71081	8.76155	8.58496	9.22882	9.0954	8.82972	8.66534	8.73471	8.76818	8.89178	9.11114	8.81698	8.60733	8.53528	8.21432	13.2	27.4	39.7	47.8	54.1	60.8	63	69.1	74	79.3	82
208/3_m2	134	185	248	273	223	142	183	201	306	246	168	182	162	216	381	148	316	203	113	7.06609	7.53138	7.9542	8.09276	7.8009	7.14975	7.5157	7.65105	8.25739	7.94251	7.39232	7.50779	7.33985	7.75489	8.57365	7.20945	8.30378	7.66534	6.82018	16.6	28.5	37	42.7	47.8	52.1	54	57.6	60.5	64.9	66.6
208/3_m3	145	175	336	232	171	237	205	257	226	370	435	372	301	394	368	235	288	321	256	7.17991	7.45121	8.39232	7.85798	7.41785	7.88874	7.67948	8.00562	7.82018	8.53138	8.76487	8.53916	8.23362	8.62205	8.52356	7.87652	8.16993	8.32643	8	14.8	27.4	37.2	43.5	47.9	53.6	54.6	58.7	61.2	65.7	67.2
226/4_m1	109	200	209	184	221	155	179	133	189	162	169	132	135	208	238	166	254	166	139	6.76818	7.64386	7.70736	7.52356	7.7879	7.27612	7.48382	7.05528	7.56224	7.33985	7.40088	7.04439	7.07682	7.70044	7.89482	7.37504	7.98868	7.37504	7.11894	16	27.6	36	41.5	46.2	51.1	52.3	55	57.1	62.5	62.4
226/4_m2	100	171	188	209	167	258	239	248	435	330	205	233	233	275	321	166	370	200	116	6.64386	7.41785	7.55459	7.70736	7.3837	8.01123	7.90087	7.9542	8.76487	8.36632	7.67948	7.86419	7.86419	8.10329	8.32643	7.37504	8.53138	7.64386	6.85798	13.7	25.8	34.2	40.1	44.7	49.7	51.9	55.6	59	64	65.1
226/4_m3	106	201	219	293	352	429	540	403	335	466	583	479	565	600	550	540	498	600	600	6.72792	7.65105	7.77479	8.19476	8.45943	8.74483	9.07682	8.65464	8.38802	8.86419	9.18735	8.90388	9.14211	9.22882	9.10329	9.07682	8.96	9.22882	9.22882	14.4	24.2	34.3	40.4	46	50.1	51.1	54.3	55.2	60.8	59.9
225/4_m1	164	300	228	182	175	177	184	215	160	158	216	185	207	104	202	178	146	135	109	7.35755	8.22882	7.83289	7.50779	7.45121	7.46761	7.52356	7.74819	7.32193	7.30378	7.75489	7.53138	7.69349	6.70044	7.65821	7.47573	7.18982	7.07682	6.76818	14.6	25.7	35.3	40.4	44.6	48.4	50.8	55.3	57.5	59.7	61
225/4_m2	180	293	240	375	197	257	372	163	217	169	151	179	189	371	110	192	101	145	152	7.49185	8.19476	7.90689	8.55075	7.62205	8.00562	8.53916	7.34873	7.76155	7.40088	7.2384	7.48382	7.56224	8.53528	6.78136	7.58496	6.65821	7.17991	7.24793	13.5	24.5	36.7	44.1	47.3	51.2	53.9	57	59.9	60.6	61.7
225/4_m3	175	261	210	245	206	269	178	251	227	209	195	224	220	302	232	290	258	262	169	7.45121	8.02791	7.71425	7.93664	7.6865	8.07146	7.47573	7.97154	7.82655	7.70736	7.60733	7.80735	7.78136	8.2384	7.85798	8.17991	8.01123	8.03342	7.40088	14.5	25.4	33.7	39.2	44.1	47.9	50.2	52.9	54.4	56.4	58.9
228/3_m1	144	173	212	217	168	298	326	209	466	262	420	394	411	453	487	411	382	344	264	7.16993	7.43463	7.72792	7.76155	7.39232	8.21917	8.34873	7.70736	8.86419	8.03342	8.71425	8.62205	8.68299	8.82337	8.92778	8.68299	8.57743	8.42626	8.04439	14.6	25.6	34.8	40.8	44	46.9	48.8	49.9	54.6	56.3	60.7
228/3_m2	147	243	328	183	194	234	201	150	174	140	159	185	143	227	261	260	247	192	200	7.19967	7.92481	8.35755	7.5157	7.59991	7.87036	7.65105	7.22882	7.44294	7.12928	7.31288	7.53138	7.15987	7.82655	8.02791	8.02237	7.94837	7.58496	7.64386	16.2	27.5	37.2	43.5	46.2	48.9	50.9	50	53.6	57.4	60.4
228/3_m3	189	234	275	158	161	147	202	135	399	415	340	407	355	418	268	369	265	231	276	7.56224	7.87036	8.10329	7.30378	7.33092	7.19967	7.65821	7.07682	8.64024	8.69697	8.40939	8.66888	8.47168	8.70736	8.06609	8.52748	8.04985	7.85175	8.10852	16.8	27.5	34.9	39.5	43.7	46.9	49.2	51.1	58.3	60.8	63.8
226/5_m1	182	286	229	232	157	180	174	156	141	157	171	134	152	159	147	172	151	168	149	7.50779	8.15987	7.8392	7.85798	7.29462	7.49185	7.44294	7.2854	7.13955	7.29462	7.41785	7.06609	7.24793	7.31288	7.19967	7.42626	7.2384	7.39232	7.21917	16.6	28.3	36.1	41.4	42.4	45.8	48.7	54	53.2	56.4	57.5
226/5_m2	198	228	244	202	142	188	183	172	184	189	170	158	207	169	140	186	159	160	110	7.62936	7.83289	7.93074	7.65821	7.14975	7.55459	7.5157	7.42626	7.52356	7.56224	7.40939	7.30378	7.69349	7.40088	7.12928	7.53916	7.31288	7.32193	6.78136	16.7	27.3	34.3	39.1	44.5	46.5	48.3	52.2	52.7	54.9	56.9
226/5_m3	154	212	302	244	286	245	239	209	145	175	205	308	329	168	184	127	145	176	121	7.26679	7.72792	8.2384	7.93074	8.15987	7.93664	7.90087	7.70736	7.17991	7.45121	7.67948	8.26679	8.36194	7.39232	7.52356	6.98868	7.17991	7.45943	6.91886	15	27.1	37.1	42.7	47.2	50.3	53.8	55.6	55.9	57.8	60.6
226/5_m4	149	262	221	219	189	196	165	230	211	163	147	125	206	285	165	185	215	227	145	7.21917	8.03342	7.7879	7.77479	7.56224	7.61471	7.36632	7.84549	7.7211	7.34873	7.19967	6.96578	7.6865	8.15482	7.36632	7.53138	7.74819	7.82655	7.17991	15.5	27.1	34.9	40.5	39.6	48.2	48.4	50	50.5	53.6	57.6
208/4_m1	164	211	230	148	159	159	161	192	314	211	143	152	143	164	146	184	89		101	7.35755	7.7211	7.84549	7.20945	7.31288	7.31288	7.33092	7.58496	8.29462	7.7211	7.15987	7.24793	7.15987	7.35755	7.18982	7.52356	6.47573		6.65821	12.5	22.1	29.8	34.4	40.8	45.1	47.3	49.6	52.8	54	55.8
208/4_m2	168	176	282	184	205	178	187	195	120	148	138	175	170	149	158	132	126		155	7.39232	7.45943	8.13955	7.52356	7.67948	7.47573	7.54689	7.60733	6.90689	7.20945	7.10852	7.45121	7.40939	7.21917	7.30378	7.04439	6.97728		7.27612	12.8	21.7	28.2	31.6	34.6	38.1	39.1	40.7	40.8	40.1	41.6
229/4_m1	145	278	173	166	175	220	186	116	198	163	154	117	130	110	166	168	141	225	149	7.17991	8.11894	7.43463	7.37504	7.45121	7.78136	7.53916	6.85798	7.62936	7.34873	7.26679	6.87036	7.02237	6.78136	7.37504	7.39232	7.13955	7.81378	7.21917	15.1	25.5	36.4	42.6	45.7	49.9	52.8	55.2	57.3	60	62.8
229/4_m2	129	195	278	208	207	214	191	170	148	191	208	169	292	188	194	190	153	227	169	7.01123	7.60733	8.11894	7.70044	7.69349	7.74147	7.57743	7.40939	7.20945	7.57743	7.70044	7.40088	8.18982	7.55459	7.59991	7.56986	7.25739	7.82655	7.40088	14.4	23.1	32.8	39.6	43.1	46.5	50.4	54.3	56.9	61.3	64.3
229/4_m3	137	208	243	191	151	172	173	165	160	184	152	115	133	152	172	139	145	94	154	7.09803	7.70044	7.92481	7.57743	7.2384	7.42626	7.43463	7.36632	7.32193	7.52356	7.24793	6.84549	7.05528	7.24793	7.42626	7.11894	7.17991	6.55459	7.26679	14.4	23.3	32.3	36.6	40.5	43.8	46.6	50	52.8	57.1	60.6
220/3_m1	110	291	302	278	198	167	193	136	150	162	166	208	210	158	262	219	228	177	175	6.78136	8.18488	8.2384	8.11894	7.62936	7.3837	7.59246	7.08746	7.22882	7.33985	7.37504	7.70044	7.71425	7.30378	8.03342	7.77479	7.83289	7.46761	7.45121	11.5	22.9	35.1	38.8	41.5	46.5	47.6	51.2	53.1	55.6	57.3
220/3_m2	110	196	204	180	296	237	241	303	288	325	372	339	313	400	368	340	440	341	139	6.78136	7.61471	7.67243	7.49185	8.20945	7.88874	7.91289	8.24317	8.16993	8.3443	8.53916	8.40514	8.29002	8.64386	8.52356	8.40939	8.78136	8.41363	7.11894	11.4	21.6	32.6	39.7	46.1	51.3	53.8	57	59.9	63.2	66.6
220/3_m3	136	205	210	188	171	161	184	152	194	134	187	160	209	209	238	157	216	199	172	7.08746	7.67948	7.71425	7.55459	7.41785	7.33092	7.52356	7.24793	7.59991	7.06609	7.54689	7.32193	7.70736	7.70736	7.89482	7.29462	7.75489	7.63662	7.42626	12.2	23.2	35.4	40.7	42.2	47.6	50.1	53.5	56.8	60.6	63
225/5_m1	148	219	214	210	169	157	196	266	402	397	544	540	522	413	271	361	320	220	291	7.20945	7.77479	7.74147	7.71425	7.40088	7.29462	7.61471	8.05528	8.65105	8.633	9.08746	9.07682	9.02791	8.69	8.08215	8.49586	8.32193	7.78136	8.18488	16.9	30.6	42.5	47.4	48.1	53.1	59.6	63.5	66.9	76.8	81.6
225/5_m2	118	226	169	241	157	194	257	147	473	336	500	467	435	412	334	295	296	288	174	6.88264	7.82018	7.40088	7.91289	7.29462	7.59991	8.00562	7.19967	8.8857	8.39232	8.96578	8.86728	8.76487	8.6865	8.3837	8.20457	8.20945	8.16993	7.44294	14.5	26.4	37.8	44.5	46.4	51.1	56.4	59.5	65.4	71.5	75
225/5_m3	139	202	226	263	146	129	135	143	404	156	512	353	488	322	249	191	210	189	241	7.11894	7.65821	7.82018	8.03892	7.18982	7.01123	7.07682	7.15987	8.65821	7.2854	9	8.46352	8.93074	8.33092	7.96	7.57743	7.71425	7.56224	7.91289	14.8	25.3	33.9	39	38.9	41.8	46.3	50	54.7	57.5	59.7
210/3_m1	129	240	193	358	362	324	326	395	384	564	480	459	509	450	480	404	363	353	367	7.01123	7.90689	7.59246	8.48382	8.49985	8.33985	8.34873	8.62571	8.58496	9.13955	8.90689	8.84235	8.99152	8.81378	8.90689	8.65821	8.50383	8.46352	8.51964	14.6	24.9	34.6	38.9	42.7	45	49.7	51.3	56	58.9	59.6
210/3_m2	141	146	169	218	217	124	197	168	257	307	268	351	397	337	366	369	374	389	205	7.13955	7.18982	7.40088	7.76818	7.76155	6.9542	7.62205	7.39232	8.00562	8.26209	8.06609	8.45533	8.633	8.3966	8.5157	8.52748	8.54689	8.60363	7.67948	17.3	26.4	30.4	34.9	38.1	38.7	41.8	45.8	50.3	53.8	56.8
210/3_m3	106	209	177	205	167	117	354	316	315	432	331	260	321	189	148	190	189	187	187	6.72792	7.70736	7.46761	7.67948	7.3837	6.87036	8.46761	8.30378	8.29921	8.75489	8.37069	8.02237	8.32643	7.56224	7.20945	7.56986	7.56224	7.54689	7.54689	15.6	27.9	36.8	40.5	43.3	46.4	51.9	54.5	58.1	63.5	64.1
210/3_m4	141	170	213	253	195	195	158	228	377	380	318	390	377	271	219	118	301	220	269	7.13955	7.40939	7.73471	7.98299	7.60733	7.60733	7.30378	7.83289	8.55842	8.56986	8.31288	8.60733	8.55842	8.08215	7.77479	6.88264	8.23362	7.78136	8.07146	14.8	25.4	32.3	37.7	41.4	43	47.1	51.5	55.6	59.4	60.7
209/3_m1	127	241	267	196	151	190	182	259	285	385	415	406	366	419	387	285	286	431	310	6.98868	7.91289	8.0607	7.61471	7.2384	7.56986	7.50779	8.01681	8.15482	8.58871	8.69697	8.66534	8.5157	8.71081	8.59619	8.15482	8.15987	8.75154	8.27612	16.1	26.3	35.9	40	41.4	44.5	48.8	51.4	52.9	55.9	58.5
209/3_m2	106	214	275	212	238	177	200	201	239	353	284	461	196	384	374	347	292	79	169	6.72792	7.74147	8.10329	7.72792	7.89482	7.46761	7.64386	7.65105	7.90087	8.46352	8.14975	8.84862	7.61471	8.58496	8.54689	8.43879	8.18982	6.30378	7.40088	11.8	22	35.4	40.7	44.6	46.7	51	53.3	56.7	62.6	65.6
209/3_m3	167	223	269	183	173	196	207	216	200	271	317	407	384	232	248	278	230	206	225	7.3837	7.8009	8.07146	7.5157	7.43463	7.61471	7.69349	7.75489	7.64386	8.08215	8.30834	8.66888	8.58496	7.85798	7.9542	8.11894	7.84549	7.6865	7.81378	13	24.2	38.6	44.5	47.3	51.8	57.5	60.7	64.1	68.2	73.1
229/5_m1	146	205	333	238	281	170	196	164	129	195	194	297	290	226	253	408	367	318	181	7.18982	7.67948	8.37938	7.89482	8.13443	7.40939	7.61471	7.35755	7.01123	7.60733	7.59991	8.21432	8.17991	7.82018	7.98299	8.67243	8.51964	8.31288	7.49985	11.4	21.9	32.9	36.3	38.1	42.9	44.2	45.7	48.5	51.1	55.6
229/5_m2	123	171	175	206	181	162	177	167	192	181	188	224	158	170	203	161	160	148	183	6.94251	7.41785	7.45121	7.6865	7.49985	7.33985	7.46761	7.3837	7.58496	7.49985	7.55459	7.80735	7.30378	7.40939	7.66534	7.33092	7.32193	7.20945	7.5157	10.4	20.3	30.9	34.6	38.1	42	43.9	45.5	48.6	54	56.6
229/5_m3	123	191	187	153	154	135	141	149	135	166	135	157	152	167	170	127	135	133	138	6.94251	7.57743	7.54689	7.25739	7.26679	7.07682	7.13955	7.21917	7.07682	7.37504	7.07682	7.29462	7.24793	7.3837	7.40939	6.98868	7.07682	7.05528	7.10852	9.7	19.3	29.5	32.3	33.8	36.7	38.7	39.3	41.1	43.9	46.1
229/5_m4	132	193	185	264	198	187	185	339	180	347	260	231	268	420	429	398	362	507	370	7.04439	7.59246	7.53138	8.04439	7.62936	7.54689	7.53138	8.40514	7.49185	8.43879	8.02237	7.85175	8.06609	8.71425	8.74483	8.63662	8.49985	8.98584	8.53138	11.5	21.8	32.6	35.8	39.4	43	45.7	47.7	49.6	54.7	56.7
217/2_m1	150	201	165	222	227	133	127	140	220	241	392	358	418	335	390	488	348	470	179	7.22882	7.65105	7.36632	7.79442	7.82655	7.05528	6.98868	7.12928	7.78136	7.91289	8.61471	8.48382	8.70736	8.38802	8.60733	8.93074	8.44294	8.87652	7.48382	11.6	20.4	28.5	32.4	35.7	39.6	42.7	46.9	49.3	50.8	53.4
217/2_m2	130	207	277	313	229	165	154	150	165	183	256	199	163	195	178	192	140	168	211	7.02237	7.69349	8.11374	8.29002	7.8392	7.36632	7.26679	7.22882	7.36632	7.5157	8	7.63662	7.34873	7.60733	7.47573	7.58496	7.12928	7.39232	7.7211	10.2	20.4	30.8	33.8	36.3	40.7	42.7	45	46	49.2	52.3
217/2_m4	145	246	256	289	262	183	213	162	169	179	324	169	224	168	171	177	124	210	187	7.17991	7.94251	8	8.17493	8.03342	7.5157	7.73471	7.33985	7.40088	7.48382	8.33985	7.40088	7.80735	7.39232	7.41785	7.46761	6.9542	7.71425	7.54689	10	19.9	30.4	35.7	38.3	45	47	49.5	51.2	54.2	57.3
311_m1	164	174	257	217	174	162	151	190	276	305	381	196	245	258	279	293	268	357	193	7.35755	7.44294	8.00562	7.76155	7.44294	7.33985	7.2384	7.56986	8.10852	8.25267	8.57365	7.61471	7.93664	8.01123	8.12412	8.19476	8.06609	8.47978	7.59246	11.7	23.1	33.3	40.3	43.6	45.4	49.6	52.7	56.9	61.7	63.5
312_m2	139	251	211	228	143	230	156	219	400	352	302	446	360	434	464	446	339	249	130	7.11894	7.97154	7.7211	7.83289	7.15987	7.84549	7.2854	7.77479	8.64386	8.45943	8.2384	8.8009	8.49185	8.76155	8.85798	8.8009	8.40514	7.96	7.02237	10.1	19.5	29.3	39.2	42.7	45.4	48.7	52.4	56	59.1	60.4
313_m3	145	197	260	375	423	574	270	413	562	444	413	523	524	569	430	467	380	349	323	7.17991	7.62205	8.02237	8.55075	8.72451	9.16491	8.07682	8.69	9.13443	8.79442	8.69	9.03067	9.03342	9.15228	8.74819	8.86728	8.56986	8.44708	8.33539	10.6	19.6	30.5	40.1	45.4	48.1	49.7	54.8	57.5	60.7	62.9
314_m4	156	211	273	224	140	190	159	159	178	145	147	152	147	172	151	199	146	210	230	7.2854	7.7211	8.09276	7.80735	7.12928	7.56986	7.31288	7.31288	7.47573	7.17991	7.19967	7.24793	7.19967	7.42626	7.2384	7.63662	7.18982	7.71425	7.84549	13.9	24.3	35.5	46.2	50.6	54.1	59	60.2	62.3	66.1	68.2
308_m1	168	238	262	237	196	186	235	335	431	468	600	588	505	507	363	549	230	89	118	7.39232	7.89482	8.03342	7.88874	7.61471	7.53916	7.87652	8.38802	8.75154	8.87036	9.22882	9.19967	8.98014	8.98584	8.50383	9.10066	7.84549	6.47573	6.88264	12.7	23.1	33	42.2	47	49.1	51.3	56.9	60.1	64.3	67
309_m2	179	221	260	238	247	186	326	193	263	299	485	173	515	449	339	429	420	254	194	7.48382	7.7879	8.02237	7.89482	7.94837	7.53916	8.34873	7.59246	8.03892	8.224	8.92184	7.43463	9.00843	8.81057	8.40514	8.74483	8.71425	7.98868	7.59991	13	22.5	32.2	40	43.3	45.4	47.2	49.8	51.6	55	57.8
310_m3	167	253	246	243	155	189	221	198	163	160	188	474	318	183	236	215	141	107	99	7.3837	7.98299	7.94251	7.92481	7.27612	7.56224	7.7879	7.62936	7.34873	7.32193	7.55459	8.88874	8.31288	7.5157	7.88264	7.74819	7.13955	6.74147	6.62936	12.3	21.8	30.9	38	42.3	43.7	45.6	47	49.2	52	53.5
315_m1	154	181	226	214	170	171	180	170	227	186	135	206	127	152	70	125	146	121	199	7.26679	7.49985	7.82018	7.74147	7.40939	7.41785	7.49185	7.40939	7.82655	7.53916	7.07682	7.6865	6.98868	7.24793	6.12928	6.96578	7.18982	6.91886	7.63662	9.3	14	26.2	31.5	35.7	39.1	42.3	44.7	47.6	51.8	52.8
316_m2	111	167	254	229	196	184	150	218	207	152	136	150	181	146	159	175	172	193	180	6.79442	7.3837	7.98868	7.8392	7.61471	7.52356	7.22882	7.76818	7.69349	7.24793	7.08746	7.22882	7.49985	7.18982	7.31288	7.45121	7.42626	7.59246	7.49185	8.3	12.9	24.7	31.4	35.2	39	45	46	49.5	51.1	52.9
317_m1	118	194	239	196	165	191	235	189	310	206	243	302	239	252	265	184	332	248	185	6.88264	7.59991	7.90087	7.61471	7.36632	7.57743	7.87652	7.56224	8.27612	7.6865	7.92481	8.2384	7.90087	7.97728	8.04985	7.52356	8.37504	7.9542	7.53138	11.1	17.3	30.7	39.4	42.8	47.5	51.6	54.5	57.4	60.4	63.5
318_m2	137	174	191	194	160	242	166	191	385	210	464	431	510	600	517	600	575	541	586	7.09803	7.44294	7.57743	7.59991	7.32193	7.91886	7.37504	7.57743	8.58871	7.71425	8.85798	8.75154	8.99435	9.22882	9.01402	9.22882	9.16742	9.07948	9.19476	11	16.3	30.7	37.7	40.7	45.8	48.9	52.4	56.5	58.1	62.8
319_m1	169	204	336	157	161	373	235	529	268	362	567	459	442	411	515	403	413	401	292	7.40088	7.67243	8.39232	7.29462	7.33092	8.54303	7.87652	9.04712	8.06609	8.49985	9.1472	8.84235	8.7879	8.68299	9.00843	8.65464	8.69	8.64746	8.18982	14.1	25	34.7	40.6	42.7	49.1	48.5	52.6	53.9	57.1	73
320_m2	142	199	301	116	453	519	308	579	459	465	208	520	488	482	465	424	534	449	468	7.14975	7.63662	8.23362	6.85798	8.82337	9.01959	8.26679	9.17742	8.84235	8.86109	7.70044	9.02237	8.93074	8.91289	8.86109	8.72792	9.0607	8.81057	8.87036	15.2	26.1	35.4	41.9	46.9	53.7	54.6	59.1	63.8	70.7	67.9
321_m3	117	212	160	215	195	142	204	256	176	346	189	239	168	180	135	131	134	154	148	6.87036	7.72792	7.32193	7.74819	7.60733	7.14975	7.67243	8	7.45943	8.43463	7.56224	7.90087	7.39232	7.49185	7.07682	7.03342	7.06609	7.26679	7.20945	13.9	25.4	33.9	40.9	44.9	51.1	53.4	57.6	60.9	66.6	67.9
322_m4	128	254	362	293	300	256	243	334	207	373	200	299	476	273	269	210	250	229	57	7	7.98868	8.49985	8.19476	8.22882	8	7.92481	8.3837	7.69349	8.54303	7.64386	8.224	8.89482	8.09276	8.07146	7.71425	7.96578	7.8392	5.83289	11.4	20.5	28.8	35.2	39.8	44.8	45.7	49.3	52.5	57.7	59.5
# unit Blood glucose: mg/dL
# unit Body weight, fat mass and lean mass: grams
# unit Plasma insulin: µg/L
# unit liver weight: mg
[truncated: 136 more columns]
