# Supplementary material
Source: publisher figshare collection journal article supplement (https://gsajournals.figshare.com/articles/dataset/_/7066604)
Supplement: Supplementary file 2 [file 1]

## Supplementary materials

### **Two novel candidate genes for insulin secretion identified by comparative genomics of multiple backcross mouse populations**

Tanja Schallschmidt<sup>1,2\*</sup>, Sandra Lebek<sup>1,2\*</sup>, Delsi Altenhofen<sup>1,2</sup>, Mareike Damen<sup>1,2</sup>, Yvonne Schulte<sup>1,2</sup>, Birgit Knebel<sup>1,2</sup>, Ralf Herwig<sup>4</sup>, Axel Rasche<sup>4</sup>, Torben Stermann<sup>1,2</sup>, Anne Kamitz<sup>2,3</sup>, Nicole Hallahan<sup>2,3</sup>, Markus Jähnert<sup>2,3</sup>, Heike Vogel<sup>2,3</sup>, Annette Schürmann<sup>2,3</sup>, Alexandra Chadt<sup>1,2†</sup> and Hadi Al-Hasani<sup>1,2§</sup>

<sup>1</sup>Institute for Clinical Biochemistry and Pathobiochemistry, German Diabetes Center (DDZ), Heinrich Heine University, Medical Faculty, Duesseldorf, D-40225, Germany

<sup>2</sup>German Center for Diabetes Research (DZD), München-Neuherberg, D-85764, Germany

<sup>3</sup>Department of Experimental Diabetology, German Institute of Human Nutrition Potsdam-Rehbruecke, Nuthetal, D-14558, Germany

<sup>4</sup>Department of Computational Molecular Biology, Max Planck Institute for Molecular Genetics, Berlin, D-14195, Germany

\*Equal contribution

§Corresponding author

†Co-corresponding author

**Primers used for quantitative real-time PCR.** Primer sequences were synthesized by Eurogentec (Seraing, Belgium). Primers were dissolved in nuclease free water to reach a final concentration of 10 nM. Fwd, Forward; Rev, Reverse.

| Target         | Sequence 5'→3'                                            |
|----------------|-----------------------------------------------------------|
| <i>Actb</i>    | Fwd: CCACCATGTACCCAGGCATT<br>Rev: AGGGTGTA AACGCAGCTCA    |
| <i>Atp4a</i>   | Fwd: GGTTAATAGGAAGGATGCCCCG<br>Rev: CAGTCGCTGACA ACTCTCCA |
| <i>Dbp</i>     | Fwd: AAAGGAGCGCAAGGCAACTC<br>Rev: AAAGGCAAAGTGCGTTCCCA    |
| <i>Hspb6</i>   | Fwd: CTCTTTGACCAGCGTTTCGG<br>Rev: CATCCAGCAGCACGGAAAAA    |
| <i>Pop4</i>    | Fwd: CGATGTGCAGGAGCTGGGAA<br>Rev: TGTC AAAGAGCCGCATGTCT   |
| <i>Rras</i>    | Fwd: CAAGTGACGAAACAGCCTCG<br>Rev: CAAAGTAGGACTGCTCCTGGC   |
| <i>Tbp</i>     | Fwd: GCGGCACTGCCCATTTATTT<br>Rev: GGCGGAATGTATCTGGCACA    |
| <i>Tmem147</i> | Fwd: TGTCATGGAGACCTTCGTCC<br>Rev: GGTTCCGCAACACCTGAGAT    |

**TaqMan probes used for quantitative real-time PCR.** TaqMan probes were purchased from Thermo Fisher Scientific (Darmstadt, Germany)

| Target        | Assay ID      |
|---------------|---------------|
| <i>Ffar2</i>  | Mm02620654_s1 |
| <i>Ffar3</i>  | Mm02621638_s1 |
| <i>Zfp719</i> | Mm01197328_m1 |

**KASP SNP primer on chromosome 7 used for genotyping of RCS.NZO.C3H-Nbg7 mice.** All primers were purchased from LGC (LGC group, Teddington, United Kingdom). A, Adenine; G, Guanine; C, Cytosine; T, Thymine.

| JAX Stock #    | Mb-Position | RS_ID     | C3HeB/FeJ | NZO/Hi |
|----------------|-------------|-----------|-----------|--------|
| 07-011167675-M | 16.6        | rs3675839 | T         | C      |
| 07-016778161-M | 25.3        | rs3701807 | A         | G      |
| 07-022058953-N | 30.6        | rs4226520 | G         | A      |
| 07-026985215-M | 37.3        | rs3724525 | G         | T      |
| 07-028240185-M | 38.5        | rs3696033 | A         | C      |
| 07-029991530-M | 47.6        | rs3675009 | T         | C      |
| 07-034063244-M | 51.8        | rs3710949 | A         | G      |
| 07-039020313-M | 56.7        | rs3680765 | G         | T      |
| 07-048028246-M | 65.6        | rs3679388 | T         | G      |
| 07-058987832-M | 76.7        | rs3693876 | A         | G      |
| 07-072051696-M | 89.5        | rs3701187 | T         | C      |
| 07-093235239-M | 110.6       | rs3706526 | C         | A      |
| 07-109117173-M | 126.6       | rs3670069 | C         | A      |
| 07-129989877-M | 147.0       | rs3700241 | G         | A      |

**siRNA oligonucleotides used for transfection of MIN6 cells.**

| Target               | Sequence 5' → 3'                                                                                      | Supplier, ordering number, product name                                                               |
|----------------------|-------------------------------------------------------------------------------------------------------|-------------------------------------------------------------------------------------------------------|
| <i>Atp4a</i>         | #1 CCUGCGUGAUC A AUGGUAU<br>#2 CUAACAUCUUAACUUCAU<br>#3 GUCUCAUCUAUGGUUUGAC<br>#4 CCAUGAACUUUCCGAGUAG | Dharmacon (Lafayette, CO, USA), #E-046922-00-0005, Accell Mouse <i>Atp4a</i> (11944) siRNA SMART pool |
| <i>Pop4</i>          | #1 GCCGUGAUCUUGGAAUAUU<br>#2 CCAUAGAAAUAUGACUU<br>#3 GGAUUAACCUUGGGUCAUC<br>#4 CUAUUAUUUCAGUCACGAA    | Dharmacon (Lafayette, CO, USA), #E-062084-00-0005, Accell Mouse <i>Pop4</i> (66161) siRNA SMART pool  |
| Control (Non-target) | Confidential                                                                                          | Qiagen (Hilden, Germany), #1022076, Negative Control siRNA                                            |
